# Supplementary material for: Integration of metabolism and regulation reveals rapid adaptability to growth on non-native substrates
Source: Research Square preprint supplement (doi:10.21203/rs.3.rs-1739374/v1), 2022-07-05
Supplement: Supplementary file 1 [file 31aef19f2c23176729e65560.xlsx]

## Sheet: yeastract2019-flat-file
YKL112W	ABF1	snR44	SNR44	27016735	2016 Jul 27	Unstressed log-phase growth (control)	Positive	Direct	RT-PCR - wt vs TFBS mutant					ABF1	ABF1
YKL112W	ABF1	YAL003W	EFB1	20385592	2010 Aug	Unstressed log-phase growth (control)	Positive	Indirect	Microarray analysis - wt vs TF mutant					ACA1	ACA1
YKL112W	ABF1	YAL003W	EFB1	28158860	2017 May 5	Unstressed log-phase growth (control)	N/A	Direct	ChIP-seq					ACE2	ACE2
YKL112W	ABF1	YAL007C	ERP2	20385592	2010 Aug	Unstressed log-phase growth (control)	Positive	Indirect	Microarray analysis - wt vs TF mutant					ADR1	ADR1
YKL112W	ABF1	YAL008W	FUN14	20385592	2010 Aug	Unstressed log-phase growth (control)	Positive	Indirect	Microarray analysis - wt vs TF mutant					AFT1	AFT1
YKL112W	ABF1	YAL012W	CYS3	20385592	2010 Aug	Unstressed log-phase growth (control)	Positive	Indirect	Microarray analysis - wt vs TF mutant					AFT2	AFT2
YKL112W	ABF1	YAL017W	PSK1	20385592	2010 Aug	Unstressed log-phase growth (control)	Positive	Indirect	Microarray analysis - wt vs TF mutant					ARG80	ARG80
YKL112W	ABF1	YAL020C	ATS1	20385592	2010 Aug	Unstressed log-phase growth (control)	Positive	Indirect	Microarray analysis - wt vs TF mutant					ARG81	ARG81
YKL112W	ABF1	YAL023C	PMT2	15343339	2004 Sep 2	N/A	N/A	Direct	Chip-on-chip					ARO80	ARO80
YKL112W	ABF1	YAL025C	MAK16	20385592	2010 Aug	Unstressed log-phase growth (control)	Negative	Indirect	Microarray analysis - wt vs TF mutant					ARR1	ARR1
YKL112W	ABF1	YAL027W	SAW1	20385592	2010 Aug	Unstressed log-phase growth (control)	Positive	Indirect	Microarray analysis - wt vs TF mutant					ASG1	ASG1
YKL112W	ABF1	YAL034W-A	MTW1	20385592	2010 Aug	Unstressed log-phase growth (control)	Negative	Indirect	Microarray analysis - wt vs TF mutant					ASH1	ASH1
YKL112W	ABF1	YAL036C	RBG1	20385592	2010 Aug	Unstressed log-phase growth (control)	Positive	Indirect	Microarray analysis - wt vs TF mutant					AZF1	AZF1
YKL112W	ABF1	YAL041W	CDC24	15343339	2004 Sep 2	N/A	N/A	Direct	Chip-on-chip					BAS1	BAS1
YKL112W	ABF1	YAL041W	CDC24	16709784	2006 May 19	N/A	N/A	Direct	Chip-on-chip					CAD1	CAD1
YKL112W	ABF1	YAL041W	CDC24	16880382	2006 Aug 8	Carbon source quality/availability	Positive	Indirect	Microarray analysis (WT vs TF overexpression)					CAT8	CAT8
YKL112W	ABF1	YAL042W	ERV46	15343339	2004 Sep 2	N/A	N/A	Direct	Chip-on-chip					CBF1	CBF1
YKL112W	ABF1	YAL042W	ERV46	16709784	2006 May 19	N/A	N/A	Direct	Chip-on-chip					CHA4	CHA4
YKL112W	ABF1	YAL042W	ERV46	20385592	2010 Aug	Unstressed log-phase growth (control)	Positive	Indirect	Microarray analysis - wt vs TF mutant					CIN5	CIN5
YKL112W	ABF1	YAL043C	PTA1	15343339	2004 Sep 2	N/A	N/A	Direct	Chip-on-chip					COM2	COM2
YKL112W	ABF1	YAL043C	PTA1	16709784	2006 May 19	N/A	N/A	Direct	Chip-on-chip					CRZ1	CRZ1
YKL112W	ABF1	YAL044C	GCV3	20385592	2010 Aug	Unstressed log-phase growth (control)	Positive	Indirect	Microarray analysis - wt vs TF mutant					CST6	CST6
YKL112W	ABF1	YAL049C	AIM2	20385592	2010 Aug	Unstressed log-phase growth (control)	Positive	Indirect	Microarray analysis - wt vs TF mutant					CUP2	CUP2
YKL112W	ABF1	YAL053W	FLC2	15343339	2004 Sep 2	N/A	N/A	Direct	Chip-on-chip					CUP9	CUP9
YKL112W	ABF1	YAL053W	FLC2	16709784	2006 May 19	N/A	N/A	Direct	Chip-on-chip					CYC8	CYC8
YKL112W	ABF1	YAL054C	ACS1	9427394	1997 Nov	Unstressed log-phase growth (control)	Positive	Indirect	lacZ - wt vs. Mutant promoter region					DAL80	DAL80
YKL112W	ABF1	YAL054C	ACS1	15343339	2004 Sep 2	N/A	N/A	Direct	Chip-on-chip					DAL81	DAL81
YKL112W	ABF1	YAL054C	ACS1	16709784	2006 May 19	N/A	N/A	Direct	Chip-on-chip					DAL82	DAL82
YKL112W	ABF1	YAL054C	ACS1	16880382	2006 Aug 8	Carbon source quality/availability	Negative	Indirect	Microarray analysis (WT vs TF overexpression)					DIG1	DIG1
YKL112W	ABF1	YAL060W	BDH1	20385592	2010 Aug	Unstressed log-phase growth (control)	Positive	Indirect	Microarray analysis - wt vs TF mutant					DIG2	DIG2
YKL112W	ABF1	YAL061W	BDH2	20385592	2010 Aug	Unstressed log-phase growth (control)	Positive	Indirect	Microarray analysis - wt vs TF mutant					DOT6	DOT6
YKL112W	ABF1	YAR009C	YAR009C	20385592	2010 Aug	Unstressed log-phase growth (control)	Positive	Indirect	Microarray analysis - wt vs TF mutant					ECM22	ECM22
YKL112W	ABF1	YAR015W	ADE1	20385592	2010 Aug	Unstressed log-phase growth (control)	Positive	Indirect	Microarray analysis - wt vs TF mutant					EDS1	EDS1
YKL112W	ABF1	YAR027W	UIP3	20385592	2010 Aug	Unstressed log-phase growth (control)	Positive	Indirect	Microarray analysis - wt vs TF mutant					ERT1	ERT1
YKL112W	ABF1	YAR028W	YAR028W	20385592	2010 Aug	Unstressed log-phase growth (control)	Positive	Indirect	Microarray analysis - wt vs TF mutant					FHL1	FHL1
YKL112W	ABF1	YAR033W	MST28	16880382	2006 Aug 8	Carbon source quality/availability	Positive	Indirect	Microarray analysis (WT vs TF overexpression)					FKH1	FKH1
YKL112W	ABF1	YAR033W	MST28	20385592	2010 Aug	Unstressed log-phase growth (control)	Positive	Indirect	Microarray analysis - wt vs TF mutant					FKH2	FKH2
YKL112W	ABF1	YAR071W	PHO11	20385592	2010 Aug	Unstressed log-phase growth (control)	Positive	Indirect	Microarray analysis - wt vs TF mutant					FLO8	FLO8
YKL112W	ABF1	YAR073W	IMD1	15192094	2004 Aug 13	Unstressed log-phase growth (control)	Negative	Indirect	Northern Blotting - wt vs TF mutant					FYV5	FYV5
YKL112W	ABF1	YAR073W	IMD1	20385592	2010 Aug	Unstressed log-phase growth (control)	Positive	Indirect	Microarray analysis - wt vs TF mutant					FZF1	FZF1
YKL112W	ABF1	YBL001C	ECM15	20385592	2010 Aug	Unstressed log-phase growth (control)	Negative	Indirect	Microarray analysis - wt vs TF mutant					GAL3	GAL3
YKL112W	ABF1	YBL006C	LDB7	20385592	2010 Aug	Unstressed log-phase growth (control)	Negative	Indirect	Microarray analysis - wt vs TF mutant					GAL4	GAL4
YKL112W	ABF1	YBL007C	SLA1	15343339	2004 Sep 2	N/A	N/A	Direct	Chip-on-chip					GAL80	GAL80
YKL112W	ABF1	YBL007C	SLA1	16709784	2006 May 19	N/A	N/A	Direct	Chip-on-chip					GAT1	GAT1
YKL112W	ABF1	YBL007C	SLA1	20385592	2010 Aug	Unstressed log-phase growth (control)	Negative	Indirect	Microarray analysis - wt vs TF mutant					GAT3	GAT3
YKL112W	ABF1	YBL009W	ALK2	20385592	2010 Aug	Unstressed log-phase growth (control)	Negative	Indirect	Microarray analysis - wt vs TF mutant					GCN4	GCN4
YKL112W	ABF1	YBL010C	YBL010C	20385592	2010 Aug	Unstressed log-phase growth (control)	Negative	Indirect	Microarray analysis - wt vs TF mutant					GCR1	GCR1
YKL112W	ABF1	YBL011W	SCT1	20385592	2010 Aug	Unstressed log-phase growth (control)	Negative	Indirect	Microarray analysis - wt vs TF mutant					GCR2	GCR2
YKL112W	ABF1	YBL016W	FUS3	20385592	2010 Aug	Unstressed log-phase growth (control)	Positive	Indirect	Microarray analysis - wt vs TF mutant					GIS1	GIS1
YKL112W	ABF1	YBL018C	POP8	15192094	2004 Aug 13	Unstressed log-phase growth (control)	Positive	Indirect	Microarray analysis - wt vs TF mutant					GLN3	GLN3
YKL112W	ABF1	YBL018C	POP8	17158163	2007	Stress	Positive	Indirect	Microarray analysis (WT vs TF mutant)					GSM1	GSM1
YKL112W	ABF1	YBL023C	MCM2	20385592	2010 Aug	Unstressed log-phase growth (control)	Positive	Indirect	Microarray analysis - wt vs TF mutant					GZF3	GZF3
YKL112W	ABF1	YBL024W	NCL1	20385592	2010 Aug	Unstressed log-phase growth (control)	Negative	Indirect	Microarray analysis - wt vs TF mutant					HAA1	HAA1
YKL112W	ABF1	YBL026W	LSM2	20385592	2010 Aug	Unstressed log-phase growth (control)	Negative	Indirect	Microarray analysis - wt vs TF mutant					HAC1	HAC1
YKL112W	ABF1	YBL027W	RPL19B	20385592	2010 Aug	Unstressed log-phase growth (control)	Negative	Indirect	Microarray analysis - wt vs TF mutant					HAL9	HAL9
YKL112W	ABF1	YBL030C	PET9	7758459	1995 May 1	Stress	Positive	Indirect	lacZ - wt vs. Mutant promoter region					HAP1	HAP1
YKL112W	ABF1	YBL032W	HEK2	20385592	2010 Aug	Unstressed log-phase growth (control)	Negative	Indirect	Microarray analysis - wt vs TF mutant					HAP2	HAP2
YKL112W	ABF1	YBL036C	YBL036C	20385592	2010 Aug	Unstressed log-phase growth (control)	Negative	Indirect	Microarray analysis - wt vs TF mutant					HAP3	HAP3
YKL112W	ABF1	YBL038W	MRPL16	15343339	2004 Sep 2	N/A	N/A	Direct	Chip-on-chip					HAP4	HAP4
YKL112W	ABF1	YBL038W	MRPL16	16880382	2006 Aug 8	Carbon source quality/availability	Negative	Indirect	Microarray analysis (WT vs TF overexpression)					HAP5	HAP5
YKL112W	ABF1	YBL039C	URA7	15343339	2004 Sep 2	N/A	N/A	Direct	Chip-on-chip					HCM1	HCM1
YKL112W	ABF1	YBL039C	URA7	16880382	2006 Aug 8	Carbon source quality/availability	Positive	Indirect	Microarray analysis (WT vs TF overexpression)					HMO1	HMO1
YKL112W	ABF1	YBL039C	URA7	28158860	2017 May 5	Unstressed log-phase growth (control)	N/A	Direct	ChIP-seq					HMS1	HMS1
YKL112W	ABF1	YBL040C	ERD2	20385592	2010 Aug	Unstressed log-phase growth (control)	Negative	Indirect	Microarray analysis - wt vs TF mutant					HMS2	HMS2
YKL112W	ABF1	YBL041W	PRE7	20385592	2010 Aug	Unstressed log-phase growth (control)	Negative	Indirect	Microarray analysis - wt vs TF mutant					HOG1	HOG1
YKL112W	ABF1	YBL042C	FUI1	28158860	2017 May 5	Unstressed log-phase growth (control)	N/A	Direct	ChIP-seq					HOT1	HOT1
YKL112W	ABF1	YBL058W	SHP1	20385592	2010 Aug	Unstressed log-phase growth (control)	Negative	Indirect	Microarray analysis - wt vs TF mutant					HSF1	HSF1
YKL112W	ABF1	YBL069W	AST1	20385592	2010 Aug	Unstressed log-phase growth (control)	Negative	Indirect	Microarray analysis - wt vs TF mutant					IFH1	IFH1
YKL112W	ABF1	YBL070C	Uncharacterized	20385592	2010 Aug	Unstressed log-phase growth (control)	Negative	Indirect	Microarray analysis - wt vs TF mutant					IME1	IME1
YKL112W	ABF1	YBL072C	RPS8A	20385592	2010 Aug	Unstressed log-phase growth (control)	Negative	Indirect	Microarray analysis - wt vs TF mutant					IMP2'	IMP2'
YKL112W	ABF1	YBL078C	ATG8	20385592	2010 Aug	Unstressed log-phase growth (control)	Positive	Indirect	Microarray analysis - wt vs TF mutant					INO2	INO2
YKL112W	ABF1	YBL079W	NUP170	15343339	2004 Sep 2	N/A	N/A	Direct	Chip-on-chip					INO4	INO4
YKL112W	ABF1	YBL079W	NUP170	16709784	2006 May 19	N/A	N/A	Direct	Chip-on-chip					IXR1	IXR1
YKL112W	ABF1	YBL080C	PET112	15343339	2004 Sep 2	N/A	N/A	Direct	Chip-on-chip					KAR4	KAR4
YKL112W	ABF1	YBL080C	PET112	16709784	2006 May 19	N/A	N/A	Direct	Chip-on-chip					LEU3	LEU3
YKL112W	ABF1	YBL090W	MRP21	16880382	2006 Aug 8	Carbon source quality/availability	Negative	Indirect	Microarray analysis (WT vs TF overexpression)					LYS14	LYS14
YKL112W	ABF1	YBL090W	MRP21	20385592	2010 Aug	Unstressed log-phase growth (control)	Negative	Indirect	Microarray analysis - wt vs TF mutant					MAC1	MAC1
YKL112W	ABF1	YBL091C	MAP2	20385592	2010 Aug	Unstressed log-phase growth (control)	Negative	Indirect	Microarray analysis - wt vs TF mutant					MAL13	MAL13
YKL112W	ABF1	YBL092W	RPL32	20385592	2010 Aug	Unstressed log-phase growth (control)	Negative	Indirect	Microarray analysis - wt vs TF mutant					MAL33	MAL33
YKL112W	ABF1	YBL096C	Uncharacterized	20385592	2010 Aug	Unstressed log-phase growth (control)	Positive	Indirect	Microarray analysis - wt vs TF mutant					MAL63	MAL63
YKL112W	ABF1	YBL098W	BNA4	15192094	2004 Aug 13	Unstressed log-phase growth (control)	Negative	Indirect	Microarray analysis - wt vs TF mutant					MBP1	MBP1
YKL112W	ABF1	YBL098W	BNA4	16880382	2006 Aug 8	Carbon source quality/availability	Positive	Indirect	Microarray analysis (WT vs TF overexpression)					MCM1	MCM1
YKL112W	ABF1	YBL098W	BNA4	17158163	2007	Stress	Negative	Indirect	Microarray analysis (WT vs TF mutant)					MET28	MET28
YKL112W	ABF1	YBL103C	RTG3	20385592	2010 Aug	Unstressed log-phase growth (control)	Negative	Indirect	Microarray analysis - wt vs TF mutant					MET31	MET31
YKL112W	ABF1	YBL107C	MIX23	20385592	2010 Aug	Unstressed log-phase growth (control)	Negative	Indirect	Microarray analysis - wt vs TF mutant					MET32	MET32
YKL112W	ABF1	YBL107W-A	Uncharacterized	20385592	2010 Aug	Unstressed log-phase growth (control)	Positive	Indirect	Microarray analysis - wt vs TF mutant					MET4	MET4
YKL112W	ABF1	YBL112C	YBL112C	20385592	2010 Aug	Unstressed log-phase growth (control)	Negative	Indirect	Microarray analysis - wt vs TF mutant					MFG1	MFG1
YKL112W	ABF1	YBR002C	RER2	20385592	2010 Aug	Unstressed log-phase growth (control)	Negative	Indirect	Microarray analysis - wt vs TF mutant					MGA1	MGA1
YKL112W	ABF1	YBR003W	COQ1	20385592	2010 Aug	Unstressed log-phase growth (control)	Negative	Indirect	Microarray analysis - wt vs TF mutant					MGA2	MGA2
YKL112W	ABF1	YBR011C	IPP1	15192094	2004 Aug 13	Unstressed log-phase growth (control)	N/A	Direct	ChIP					MIG1	MIG1
YKL112W	ABF1	YBR011C	IPP1	15343339	2004 Sep 2	N/A	N/A	Direct	Chip-on-chip					MIG2	MIG2
YKL112W	ABF1	YBR011C	IPP1	17158163	2007	Stress	Positive	Indirect	Microarray analysis (WT vs TF mutant)					MIG3	MIG3
YKL112W	ABF1	YBR011C	IPP1	25748434	2015 Mar 5	Stress	N/A	Direct	ChIP					MIT1	MIT1
YKL112W	ABF1	YBR012C	Uncharacterized	20385592	2010 Aug	Unstressed log-phase growth (control)	Positive	Indirect	Microarray analysis - wt vs TF mutant					MOT2	MOT2
YKL112W	ABF1	YBR012W-B	YBR012W-B	20385592	2010 Aug	Unstressed log-phase growth (control)	Positive	Indirect	Microarray analysis - wt vs TF mutant					MOT3	MOT3
YKL112W	ABF1	YBR029C	CDS1	15343339	2004 Sep 2	N/A	N/A	Direct	Chip-on-chip					MSA1	MSA1
YKL112W	ABF1	YBR029C	CDS1	16709784	2006 May 19	N/A	N/A	Direct	Chip-on-chip					MSA2	MSA2
YKL112W	ABF1	YBR030W	RKM3	15343339	2004 Sep 2	N/A	N/A	Direct	Chip-on-chip					MSN1	MSN1
YKL112W	ABF1	YBR030W	RKM3	16709784	2006 May 19	N/A	N/A	Direct	Chip-on-chip					MSN2	MSN2
YKL112W	ABF1	YBR031W	RPL4A	16709784	2006 May 19	N/A	N/A	Direct	Chip-on-chip					MSN4	MSN4
YKL112W	ABF1	YBR031W	RPL4A	20385592	2010 Aug	Unstressed log-phase growth (control)	Positive	Indirect	Microarray analysis - wt vs TF mutant					MSS11	MSS11
YKL112W	ABF1	YBR032W	YBR032W	20385592	2010 Aug	Unstressed log-phase growth (control)	Positive	Indirect	Microarray analysis - wt vs TF mutant					MSS1	MSS1
YKL112W	ABF1	YBR034C	HMT1	20385592	2010 Aug	Unstressed log-phase growth (control)	Negative	Indirect	Microarray analysis - wt vs TF mutant					MTH1	MTH1
YKL112W	ABF1	YBR035C	PDX3	20385592	2010 Aug	Unstressed log-phase growth (control)	Negative	Indirect	Microarray analysis - wt vs TF mutant					NDD1	NDD1
YKL112W	ABF1	YBR036C	CSG2	20385592	2010 Aug	Unstressed log-phase growth (control)	Negative	Indirect	Microarray analysis - wt vs TF mutant					NDT80	NDT80
YKL112W	ABF1	YBR039W	ATP3	20385592	2010 Aug	Unstressed log-phase growth (control)	Negative	Indirect	Microarray analysis - wt vs TF mutant					NGG1	NGG1
YKL112W	ABF1	YBR046C	ZTA1	20385592	2010 Aug	Unstressed log-phase growth (control)	Positive	Indirect	Microarray analysis - wt vs TF mutant					NRG1	NRG1
YKL112W	ABF1	YBR052C	RFS1	20385592	2010 Aug	Unstressed log-phase growth (control)	Negative	Indirect	Microarray analysis - wt vs TF mutant					NRG2	NRG2
YKL112W	ABF1	YBR055C	PRP6	20385592	2010 Aug	Unstressed log-phase growth (control)	Negative	Indirect	Microarray analysis - wt vs TF mutant					OAF1	OAF1
YKL112W	ABF1	YBR057C	MUM2	20385592	2010 Aug	Unstressed log-phase growth (control)	Negative	Indirect	Microarray analysis - wt vs TF mutant					OAF3	OAF3
YKL112W	ABF1	YBR060C	ORC2	20385592	2010 Aug	Unstressed log-phase growth (control)	Negative	Indirect	Microarray analysis - wt vs TF mutant					OPI1	OPI1
YKL112W	ABF1	YBR061C	TRM7	20385592	2010 Aug	Unstressed log-phase growth (control)	Negative	Indirect	Microarray analysis - wt vs TF mutant					PDC2	PDC2
YKL112W	ABF1	YBR062C	YBR062C	20385592	2010 Aug	Unstressed log-phase growth (control)	Negative	Indirect	Microarray analysis - wt vs TF mutant					PDR1	PDR1
YKL112W	ABF1	YBR065C	ECM2	20385592	2010 Aug	Unstressed log-phase growth (control)	Negative	Indirect	Microarray analysis - wt vs TF mutant					PDR3	PDR3
YKL112W	ABF1	YBR067C	TIP1	16880382	2006 Aug 8	Carbon source quality/availability	Positive	Indirect	Microarray analysis (WT vs TF overexpression)					PDR8	PDR8
YKL112W	ABF1	YBR067C	TIP1	20385592	2010 Aug	Unstressed log-phase growth (control)	Positive	Indirect	Microarray analysis - wt vs TF mutant					PHD1	PHD1
YKL112W	ABF1	YBR069C	TAT1	20385592	2010 Aug	Unstressed log-phase growth (control)	Negative	Indirect	Microarray analysis - wt vs TF mutant					PHO23	PHO23
YKL112W	ABF1	YBR072W	HSP26	15192094	2004 Aug 13	Unstressed log-phase growth (control)	Negative	Indirect	Northern Blotting - wt vs TF mutant					PHO2	PHO2
YKL112W	ABF1	YBR072W	HSP26	16880382	2006 Aug 8	Carbon source quality/availability	Positive	Indirect	Microarray analysis (WT vs TF overexpression)					PHO4	PHO4
YKL112W	ABF1	YBR072W	HSP26	18305101	2008 May	Stress	Positive	Indirect	microarray					PIP2	PIP2
YKL112W	ABF1	YBR077C	SLM4	15343339	2004 Sep 2	N/A	N/A	Direct	Chip-on-chip					PLM2	PLM2
YKL112W	ABF1	YBR078W	ECM33	15343339	2004 Sep 2	N/A	N/A	Direct	Chip-on-chip					PPR1	PPR1
YKL112W	ABF1	YBR080C	SEC18	15343339	2004 Sep 2	N/A	N/A	Direct	Chip-on-chip					PUT3	PUT3
YKL112W	ABF1	YBR092C	PHO3	20385592	2010 Aug	Unstressed log-phase growth (control)	Positive	Indirect	Microarray analysis - wt vs TF mutant					RAP1	RAP1
YKL112W	ABF1	YBR095C	RXT2	20385592	2010 Aug	Unstressed log-phase growth (control)	Negative	Indirect	Microarray analysis - wt vs TF mutant					RDR1	RDR1
YKL112W	ABF1	YBR096W	YBR096W	20385592	2010 Aug	Unstressed log-phase growth (control)	Negative	Indirect	Microarray analysis - wt vs TF mutant					RDS1	RDS1
YKL112W	ABF1	YBR097W	VPS15	20385592	2010 Aug	Unstressed log-phase growth (control)	Positive	Indirect	Microarray analysis - wt vs TF mutant					RDS2	RDS2
YKL112W	ABF1	YBR098W	MMS4	20385592	2010 Aug	Unstressed log-phase growth (control)	Positive	Indirect	Microarray analysis - wt vs TF mutant					REB1	REB1
YKL112W	ABF1	YBR101C	FES1	15343339	2004 Sep 2	N/A	N/A	Direct	Chip-on-chip					RFX1	RFX1
YKL112W	ABF1	YBR101C	FES1	16709784	2006 May 19	N/A	N/A	Direct	Chip-on-chip					RGM1	RGM1
YKL112W	ABF1	YBR103W	SIF2	20385592	2010 Aug	Unstressed log-phase growth (control)	Negative	Indirect	Microarray analysis - wt vs TF mutant					RGT1	RGT1
YKL112W	ABF1	YBR104W	YMC2	20385592	2010 Aug	Unstressed log-phase growth (control)	Negative	Indirect	Microarray analysis - wt vs TF mutant					RIM101	RIM101
YKL112W	ABF1	YBR109C	CMD1	15343339	2004 Sep 2	N/A	N/A	Direct	Chip-on-chip					RLM1	RLM1
YKL112W	ABF1	YBR110W	ALG1	15343339	2004 Sep 2	N/A	N/A	Direct	Chip-on-chip					RME1	RME1
YKL112W	ABF1	YBR121C	GRS1	15192094	2004 Aug 13	Unstressed log-phase growth (control)	Positive	Indirect	Microarray analysis - wt vs TF mutant					ROX1	ROX1
YKL112W	ABF1	YBR125C	PTC4	20385592	2010 Aug	Unstressed log-phase growth (control)	Negative	Indirect	Microarray analysis - wt vs TF mutant					RPH1	RPH1
YKL112W	ABF1	YBR127C	VMA2	20385592	2010 Aug	Unstressed log-phase growth (control)	Negative	Indirect	Microarray analysis - wt vs TF mutant					RPI1	RPI1
YKL112W	ABF1	YBR129C	OPY1	15343339	2004 Sep 2	N/A	N/A	Direct	Chip-on-chip					RPN4	RPN4
YKL112W	ABF1	YBR129C	OPY1	16709784	2006 May 19	N/A	N/A	Direct	Chip-on-chip					RSF2	RSF2
YKL112W	ABF1	YBR130C	SHE3	20385592	2010 Aug	Unstressed log-phase growth (control)	Negative	Indirect	Microarray analysis - wt vs TF mutant					RTG1	RTG1
YKL112W	ABF1	YBR131W	CCZ1	20385592	2010 Aug	Unstressed log-phase growth (control)	Positive	Indirect	Microarray analysis - wt vs TF mutant					RTG3	RTG3
YKL112W	ABF1	YBR135W	CKS1	20385592	2010 Aug	Unstressed log-phase growth (control)	Negative	Indirect	Microarray analysis - wt vs TF mutant					SEF1	SEF1
YKL112W	ABF1	YBR141C	BMT2	20385592	2010 Aug	Unstressed log-phase growth (control)	Negative	Indirect	Microarray analysis - wt vs TF mutant					SFL1	SFL1
YKL112W	ABF1	YBR142W	MAK5	20385592	2010 Aug	Unstressed log-phase growth (control)	Negative	Indirect	Microarray analysis - wt vs TF mutant					SFP1	SFP1
YKL112W	ABF1	YBR143C	SUP45	9364750	1997 Oct	Unstressed log-phase growth (control)	Positive	Indirect	Northern - wt vs. Mutant promoter region					SIP4	SIP4
YKL112W	ABF1	YBR143C	SUP45	20385592	2010 Aug	Unstressed log-phase growth (control)	Negative	Indirect	Microarray analysis - wt vs TF mutant					SKN7	SKN7
YKL112W	ABF1	YBR145W	ADH5	20385592	2010 Aug	Unstressed log-phase growth (control)	Positive	Indirect	Microarray analysis - wt vs TF mutant					SKO1	SKO1
YKL112W	ABF1	YBR146W	MRPS9	15343339	2004 Sep 2	N/A	N/A	Direct	Chip-on-chip					SMP1	SMP1
YKL112W	ABF1	YBR146W	MRPS9	16709784	2006 May 19	N/A	N/A	Direct	Chip-on-chip					SOK2	SOK2
YKL112W	ABF1	YBR155W	CNS1	20385592	2010 Aug	Unstressed log-phase growth (control)	Negative	Indirect	Microarray analysis - wt vs TF mutant					SPT10	SPT10
YKL112W	ABF1	YBR158W	AMN1	20385592	2010 Aug	Unstressed log-phase growth (control)	Negative	Indirect	Microarray analysis - wt vs TF mutant					SPT23	SPT23
YKL112W	ABF1	YBR159W	IFA38	20385592	2010 Aug	Unstressed log-phase growth (control)	Negative	Indirect	Microarray analysis - wt vs TF mutant					SRD1	SRD1
YKL112W	ABF1	YBR160W	CDC28	20385592	2010 Aug	Unstressed log-phase growth (control)	Negative	Indirect	Microarray analysis - wt vs TF mutant					STB3	STB3
YKL112W	ABF1	YBR161W	CSH1	20385592	2010 Aug	Unstressed log-phase growth (control)	Negative	Indirect	Microarray analysis - wt vs TF mutant					STB4	STB4
YKL112W	ABF1	YBR162C	TOS1	20385592	2010 Aug	Unstressed log-phase growth (control)	Negative	Indirect	Microarray analysis - wt vs TF mutant					STB5	STB5
YKL112W	ABF1	YBR162W-A	YSY6	20385592	2010 Aug	Unstressed log-phase growth (control)	Negative	Indirect	Microarray analysis - wt vs TF mutant					STE12	STE12
YKL112W	ABF1	YBR163W	EXO5	20385592	2010 Aug	Unstressed log-phase growth (control)	Negative	Indirect	Microarray analysis - wt vs TF mutant					STP1	STP1
YKL112W	ABF1	YBR164C	ARL1	20385592	2010 Aug	Unstressed log-phase growth (control)	Negative	Indirect	Microarray analysis - wt vs TF mutant					STP2	STP2
YKL112W	ABF1	YBR166C	TYR1	20385592	2010 Aug	Unstressed log-phase growth (control)	Negative	Indirect	Microarray analysis - wt vs TF mutant					STP4	STP4
YKL112W	ABF1	YBR170C	NPL4	20385592	2010 Aug	Unstressed log-phase growth (control)	Negative	Indirect	Microarray analysis - wt vs TF mutant					SUM1	SUM1
YKL112W	ABF1	YBR191W	RPL21A	20385592	2010 Aug	Unstressed log-phase growth (control)	Negative	Indirect	Microarray analysis - wt vs TF mutant					SUT1	SUT1
YKL112W	ABF1	YBR193C	MED8	20385592	2010 Aug	Unstressed log-phase growth (control)	Negative	Indirect	Microarray analysis - wt vs TF mutant					SUT2	SUT2
YKL112W	ABF1	YBR197C	YBR197C	20385592	2010 Aug	Unstressed log-phase growth (control)	Positive	Indirect	Microarray analysis - wt vs TF mutant					SWI4	SWI4
YKL112W	ABF1	YBR199W	KTR4	20385592	2010 Aug	Unstressed log-phase growth (control)	Negative	Indirect	Microarray analysis - wt vs TF mutant					SWI5	SWI5
YKL112W	ABF1	YBR200W	BEM1	20385592	2010 Aug	Unstressed log-phase growth (control)	Negative	Indirect	Microarray analysis - wt vs TF mutant					SWI6	SWI6
YKL112W	ABF1	YBR210W	ERV15	20385592	2010 Aug	Unstressed log-phase growth (control)	Negative	Indirect	Microarray analysis - wt vs TF mutant					TBF1	TBF1
YKL112W	ABF1	YBR211C	AME1	15343339	2004 Sep 2	N/A	N/A	Direct	Chip-on-chip					TBS1	TBS1
YKL112W	ABF1	YBR211C	AME1	16709784	2006 May 19	N/A	N/A	Direct	Chip-on-chip					TDA9	TDA9
YKL112W	ABF1	YBR212W	NGR1	15343339	2004 Sep 2	N/A	N/A	Direct	Chip-on-chip					TEC1	TEC1
YKL112W	ABF1	YBR212W	NGR1	16709784	2006 May 19	N/A	N/A	Direct	Chip-on-chip					THI2	THI2
YKL112W	ABF1	YBR212W	NGR1	20385592	2010 Aug	Unstressed log-phase growth (control)	Negative	Indirect	Microarray analysis - wt vs TF mutant					TOD6	TOD6
YKL112W	ABF1	YBR215W	HPC2	20385592	2010 Aug	Unstressed log-phase growth (control)	Negative	Indirect	Microarray analysis - wt vs TF mutant					TOS4	TOS4
YKL112W	ABF1	YBR216C	YBP1	20385592	2010 Aug	Unstressed log-phase growth (control)	Negative	Indirect	Microarray analysis - wt vs TF mutant					TOS8	TOS8
YKL112W	ABF1	YBR232C	Uncharacterized	20385592	2010 Aug	Unstressed log-phase growth (control)	Negative	Indirect	Microarray analysis - wt vs TF mutant					TUP1	TUP1
YKL112W	ABF1	YBR233W	PBP2	20385592	2010 Aug	Unstressed log-phase growth (control)	Negative	Indirect	Microarray analysis - wt vs TF mutant					TYE7	TYE7
YKL112W	ABF1	YBR238C	YBR238C	20385592	2010 Aug	Unstressed log-phase growth (control)	Negative	Indirect	Microarray analysis - wt vs TF mutant					UGA3	UGA3
YKL112W	ABF1	YBR239C	ERT1	20385592	2010 Aug	Unstressed log-phase growth (control)	Negative	Indirect	Microarray analysis - wt vs TF mutant					UME1	UME1
YKL112W	ABF1	YBR242W	YBR242W	20385592	2010 Aug	Unstressed log-phase growth (control)	Negative	Indirect	Microarray analysis - wt vs TF mutant					UME6	UME6
YKL112W	ABF1	YBR244W	GPX2	20385592	2010 Aug	Unstressed log-phase growth (control)	Negative	Indirect	Microarray analysis - wt vs TF mutant					UPC2	UPC2
YKL112W	ABF1	YBR246W	RRT2	20385592	2010 Aug	Unstressed log-phase growth (control)	Negative	Indirect	Microarray analysis - wt vs TF mutant					URC2	URC2
YKL112W	ABF1	YBR247C	ENP1	20385592	2010 Aug	Unstressed log-phase growth (control)	Negative	Indirect	Microarray analysis - wt vs TF mutant					URE2	URE2
YKL112W	ABF1	YBR248C	HIS7	9349705	1997 Sep	In vitro	N/A	Direct	EMSA					USV1	USV1
YKL112W	ABF1	YBR248C	HIS7	11937506	2002 Jun 14	Unstressed log-phase growth (control)	Positive	Indirect	Northern - wt vs. Mutant promoter region					WAR1	WAR1
YKL112W	ABF1	YBR248C	HIS7	15456886	2004 Oct	N/A	N/A	Direct	alfa-gal - wt vs. target promoter mutant					WTM1	WTM1
YKL112W	ABF1	YBR248C	HIS7	20385592	2010 Aug	Unstressed log-phase growth (control)	Negative	Indirect	Microarray analysis - wt vs TF mutant					WTM2	WTM2
YKL112W	ABF1	YBR252W	DUT1	20385592	2010 Aug	Unstressed log-phase growth (control)	Negative	Indirect	Microarray analysis - wt vs TF mutant					XBP1	XBP1
YKL112W	ABF1	YBR254C	TRS20	20385592	2010 Aug	Unstressed log-phase growth (control)	Negative	Indirect	Microarray analysis - wt vs TF mutant					YAP1	YAP1
YKL112W	ABF1	YBR256C	RIB5	20385592	2010 Aug	Unstressed log-phase growth (control)	Negative	Indirect	Microarray analysis - wt vs TF mutant					YAP3	YAP3
YKL112W	ABF1	YBR258C	SHG1	20385592	2010 Aug	Unstressed log-phase growth (control)	Negative	Indirect	Microarray analysis - wt vs TF mutant					YAP5	YAP5
YKL112W	ABF1	YBR263W	SHM1	20385592	2010 Aug	Unstressed log-phase growth (control)	Negative	Indirect	Microarray analysis - wt vs TF mutant					YAP6	YAP6
YKL112W	ABF1	YBR264C	YPT10	20385592	2010 Aug	Unstressed log-phase growth (control)	Negative	Indirect	Microarray analysis - wt vs TF mutant					YAP7	YAP7
YKL112W	ABF1	YBR266C	Uncharacterized	20385592	2010 Aug	Unstressed log-phase growth (control)	Negative	Indirect	Microarray analysis - wt vs TF mutant					TOG1	TOG1
YKL112W	ABF1	YBR267W	REI1	20385592	2010 Aug	Unstressed log-phase growth (control)	Negative	Indirect	Microarray analysis - wt vs TF mutant					ZNF1	ZNF1
YKL112W	ABF1	YBR268W	MRPL37	20385592	2010 Aug	Unstressed log-phase growth (control)	Negative	Indirect	Microarray analysis - wt vs TF mutant					YGR067C	YGR067C
YKL112W	ABF1	YBR271W	EFM2	20385592	2010 Aug	Unstressed log-phase growth (control)	Negative	Indirect	Microarray analysis - wt vs TF mutant					YHP1	YHP1
YKL112W	ABF1	YBR273C	UBX7	20385592	2010 Aug	Unstressed log-phase growth (control)	Negative	Indirect	Microarray analysis - wt vs TF mutant					YJL206C	YJL206C
YKL112W	ABF1	YBR282W	MRPL27	20385592	2010 Aug	Unstressed log-phase growth (control)	Negative	Indirect	Microarray analysis - wt vs TF mutant					YKL222C	YKL222C
YKL112W	ABF1	YBR283C	SSH1	15343339	2004 Sep 2	N/A	N/A	Direct	Chip-on-chip					YLR278C	YLR278C
YKL112W	ABF1	YBR284W	YBR284W	15343339	2004 Sep 2	N/A	N/A	Direct	Chip-on-chip					PUL4	PUL4
YKL112W	ABF1	YBR286W	APE3	16709784	2006 May 19	N/A	N/A	Direct	Chip-on-chip					YOX1	YOX1
YKL112W	ABF1	YBR290W	BSD2	16709784	2006 May 19	N/A	N/A	Direct	Chip-on-chip					SDD4	SDD4
YKL112W	ABF1	YBR290W	BSD2	20385592	2010 Aug	Unstressed log-phase growth (control)	Negative	Indirect	Microarray analysis - wt vs TF mutant					YPR196W	YPR196W
YKL112W	ABF1	YBR294W	SUL1	16880382	2006 Aug 8	Carbon source quality/availability	Positive	Indirect	Microarray analysis (WT vs TF overexpression)					YRM1	YRM1
YKL112W	ABF1	YBR294W	SUL1	20385592	2010 Aug	Unstressed log-phase growth (control)	Positive	Indirect	Microarray analysis - wt vs TF mutant					YRR1	YRR1
YKL112W	ABF1	YBR295W	PCA1	16880382	2006 Aug 8	Carbon source quality/availability	Positive	Indirect	Microarray analysis (WT vs TF overexpression)					ZAP1	ZAP1
YKL112W	ABF1	YBR295W	PCA1	20385592	2010 Aug	Unstressed log-phase growth (control)	Positive	Indirect	Microarray analysis - wt vs TF mutant					LSM1	LSM1
YKL112W	ABF1	YCL001W	RER1	15343339	2004 Sep 2	N/A	N/A	Direct	Chip-on-chip					SNF1	SNF1
YKL112W	ABF1	YCL004W	PGS1	15343339	2004 Sep 2	N/A	N/A	Direct	Chip-on-chip					ROF1	ROF1
YKL112W	ABF1	YCL005W	LDB16	15343339	2004 Sep 2	N/A	N/A	Direct	Chip-on-chip					RTG2	RTG2
YKL112W	ABF1	YCL005W	LDB16	20385592	2010 Aug	Unstressed log-phase growth (control)	Positive	Indirect	Microarray analysis - wt vs TF mutant					PEX2	PEX2
YKL112W	ABF1	YCL011C	GBP2	15343339	2004 Sep 2	N/A	N/A	Direct	Chip-on-chip					LAP3	LAP3
YKL112W	ABF1	YCL011C	GBP2	16709784	2006 May 19	N/A	N/A	Direct	Chip-on-chip					SPT3	SPT3
YKL112W	ABF1	YCL016C	DCC1	15343339	2004 Sep 2	N/A	N/A	Direct	Chip-on-chip					SPT8	SPT8
YKL112W	ABF1	YCL017C	NFS1	15343339	2004 Sep 2	N/A	N/A	Direct	Chip-on-chip					SNF2	SNF2
YKL112W	ABF1	YCL027W	FUS1	20385592	2010 Aug	Unstressed log-phase growth (control)	Positive	Indirect	Microarray analysis - wt vs TF mutant					HFI1	HFI1
YKL112W	ABF1	YCL028W	RNQ1	20385592	2010 Aug	Unstressed log-phase growth (control)	Positive	Indirect	Microarray analysis - wt vs TF mutant					SPT7	SPT7
YKL112W	ABF1	YCL029C	BIK1	20385592	2010 Aug	Unstressed log-phase growth (control)	Positive	Indirect	Microarray analysis - wt vs TF mutant					SPT2	SPT2
YKL112W	ABF1	YCL030C	HIS4	15456886	2004 Oct	N/A	N/A	Direct	ChIP					GAT4	GAT4
YKL112W	ABF1	YCL031C	RRP7	15343339	2004 Sep 2	N/A	N/A	Direct	Chip-on-chip					RSC30	RSC30
YKL112W	ABF1	YCL031C	RRP7	16709784	2006 May 19	N/A	N/A	Direct	Chip-on-chip					YPR015C	YPR015C
YKL112W	ABF1	YCL031C	RRP7	28158860	2017 May 5	Unstressed log-phase growth (control)	N/A	Direct	ChIP-seq					0
YKL112W	ABF1	YCL040W	GLK1	20385592	2010 Aug	Unstressed log-phase growth (control)	Positive	Indirect	Microarray analysis - wt vs TF mutant
YKL112W	ABF1	YCL042W	YCL042W	20385592	2010 Aug	Unstressed log-phase growth (control)	Positive	Indirect	Microarray analysis - wt vs TF mutant
YKL112W	ABF1	YCL049C	YCL049C	20385592	2010 Aug	Unstressed log-phase growth (control)	Positive	Indirect	Microarray analysis - wt vs TF mutant
YKL112W	ABF1	YCL054W	SPB1	20385592	2010 Aug	Unstressed log-phase growth (control)	Negative	Indirect	Microarray analysis - wt vs TF mutant
YKL112W	ABF1	YCL064C	CHA1	16880382	2006 Aug 8	Carbon source quality/availability	Negative	Indirect	Microarray analysis (WT vs TF overexpression)
YKL112W	ABF1	YCL064C	CHA1	20385592	2010 Aug	Unstressed log-phase growth (control)	Positive	Indirect	Microarray analysis - wt vs TF mutant
YKL112W	ABF1	YCL065W	Uncharacterized	20385592	2010 Aug	Unstressed log-phase growth (control)	Positive	Indirect	Microarray analysis - wt vs TF mutant
YKL112W	ABF1	YCR001W	YCR001W	15343339	2004 Sep 2	N/A	N/A	Direct	Chip-on-chip
YKL112W	ABF1	YCR002C	CDC10	15192094	2004 Aug 13	Unstressed log-phase growth (control)	Positive	Indirect	Microarray analysis - wt vs TF mutant
YKL112W	ABF1	YCR003W	MRPL32	15343339	2004 Sep 2	N/A	N/A	Direct	Chip-on-chip
YKL112W	ABF1	YCR003W	MRPL32	17158163	2007	Stress	Positive	Indirect	Microarray analysis (WT vs TF mutant)
YKL112W	ABF1	YCR013C	Uncharacterized	20385592	2010 Aug	Unstressed log-phase growth (control)	Positive	Indirect	Microarray analysis - wt vs TF mutant
YKL112W	ABF1	YCR018C-A	Uncharacterized	20385592	2010 Aug	Unstressed log-phase growth (control)	Positive	Indirect	Microarray analysis - wt vs TF mutant
YKL112W	ABF1	YCR021C	HSP30	16880382	2006 Aug 8	Carbon source quality/availability	Positive	Indirect	Microarray analysis (WT vs TF overexpression)
YKL112W	ABF1	YCR021C	HSP30	18305101	2008 May	Stress	Positive	Indirect	microarray
YKL112W	ABF1	YCR021C	HSP30	20385592	2010 Aug	Unstressed log-phase growth (control)	Positive	Indirect	Microarray analysis - wt vs TF mutant
YKL112W	ABF1	YCR046C	IMG1	20385592	2010 Aug	Unstressed log-phase growth (control)	Positive	Indirect	Microarray analysis - wt vs TF mutant
YKL112W	ABF1	YCR053W	THR4	15343339	2004 Sep 2	N/A	N/A	Direct	Chip-on-chip
YKL112W	ABF1	YCR082W	AHC2	15343339	2004 Sep 2	N/A	N/A	Direct	Chip-on-chip
YKL112W	ABF1	YCR082W	AHC2	16709784	2006 May 19	N/A	N/A	Direct	Chip-on-chip
YKL112W	ABF1	YCR085W	YCR085W	20385592	2010 Aug	Unstressed log-phase growth (control)	Positive	Indirect	Microarray analysis - wt vs TF mutant
YKL112W	ABF1	YCR099C	YCR099C	20385592	2010 Aug	Unstressed log-phase growth (control)	Positive	Indirect	Microarray analysis - wt vs TF mutant
YKL112W	ABF1	YCR100C	EMA35	20385592	2010 Aug	Unstressed log-phase growth (control)	Positive	Indirect	Microarray analysis - wt vs TF mutant
YKL112W	ABF1	YCR104W	PAU3	20385592	2010 Aug	Unstressed log-phase growth (control)	Positive	Indirect	Microarray analysis - wt vs TF mutant
YKL112W	ABF1	YCR107W	AAD3	20385592	2010 Aug	Unstressed log-phase growth (control)	Positive	Indirect	Microarray analysis - wt vs TF mutant
YKL112W	ABF1	YDL005C	MED2	20385592	2010 Aug	Unstressed log-phase growth (control)	Positive	Indirect	Microarray analysis - wt vs TF mutant
YKL112W	ABF1	YDL006W	PTC1	20385592	2010 Aug	Unstressed log-phase growth (control)	Positive	Indirect	Microarray analysis - wt vs TF mutant
YKL112W	ABF1	YDL008W	APC11	20385592	2010 Aug	Unstressed log-phase growth (control)	Positive	Indirect	Microarray analysis - wt vs TF mutant
YKL112W	ABF1	YDL010W	GRX6	15343339	2004 Sep 2	N/A	N/A	Direct	Chip-on-chip
YKL112W	ABF1	YDL012C	YDL012C	15343339	2004 Sep 2	N/A	N/A	Direct	Chip-on-chip
YKL112W	ABF1	YDL012C	YDL012C	20385592	2010 Aug	Unstressed log-phase growth (control)	Positive	Indirect	Microarray analysis - wt vs TF mutant
YKL112W	ABF1	YDL014W	NOP1	18305101	2008 May	Stress	Negative	Indirect	microarray
YKL112W	ABF1	YDL014W	NOP1	28158860	2017 May 5	Unstressed log-phase growth (control)	N/A	Direct	ChIP-seq
YKL112W	ABF1	YDL021W	GPM2	20385592	2010 Aug	Unstressed log-phase growth (control)	Positive	Indirect	Microarray analysis - wt vs TF mutant
YKL112W	ABF1	YDL022W	GPD1	20385592	2010 Aug	Unstressed log-phase growth (control)	Positive	Indirect	Microarray analysis - wt vs TF mutant
YKL112W	ABF1	YDL023C	Uncharacterized	20385592	2010 Aug	Unstressed log-phase growth (control)	Positive	Indirect	Microarray analysis - wt vs TF mutant
YKL112W	ABF1	YDL024C	DIA3	20385592	2010 Aug	Unstressed log-phase growth (control)	Positive	Indirect	Microarray analysis - wt vs TF mutant
YKL112W	ABF1	YDL029W	ARP2	20385592	2010 Aug	Unstressed log-phase growth (control)	Positive	Indirect	Microarray analysis - wt vs TF mutant
YKL112W	ABF1	YDL032W	Uncharacterized	15343339	2004 Sep 2	N/A	N/A	Direct	Chip-on-chip
YKL112W	ABF1	YDL035C	GPR1	15343339	2004 Sep 2	N/A	N/A	Direct	Chip-on-chip
YKL112W	ABF1	YDL037C	BSC1	20385592	2010 Aug	Unstressed log-phase growth (control)	Negative	Indirect	Microarray analysis - wt vs TF mutant
YKL112W	ABF1	YDL039C	PRM7	20385592	2010 Aug	Unstressed log-phase growth (control)	Negative	Indirect	Microarray analysis - wt vs TF mutant
YKL112W	ABF1	YDL044C	MTF2	20385592	2010 Aug	Unstressed log-phase growth (control)	Positive	Indirect	Microarray analysis - wt vs TF mutant
YKL112W	ABF1	YDL045C	FAD1	20385592	2010 Aug	Unstressed log-phase growth (control)	Positive	Indirect	Microarray analysis - wt vs TF mutant
YKL112W	ABF1	YDL054C	MCH1	20385592	2010 Aug	Unstressed log-phase growth (control)	Positive	Indirect	Microarray analysis - wt vs TF mutant
YKL112W	ABF1	YDL055C	PSA1	20385592	2010 Aug	Unstressed log-phase growth (control)	Positive	Indirect	Microarray analysis - wt vs TF mutant
YKL112W	ABF1	YDL056W	MBP1	20385592	2010 Aug	Unstressed log-phase growth (control)	Positive	Indirect	Microarray analysis - wt vs TF mutant
YKL112W	ABF1	YDL057W	YDL057W	20385592	2010 Aug	Unstressed log-phase growth (control)	Positive	Indirect	Microarray analysis - wt vs TF mutant
YKL112W	ABF1	YDL059C	RAD59	20385592	2010 Aug	Unstressed log-phase growth (control)	Positive	Indirect	Microarray analysis - wt vs TF mutant
YKL112W	ABF1	YDL060W	TSR1	28158860	2017 May 5	Unstressed log-phase growth (control)	N/A	Direct	ChIP-seq
YKL112W	ABF1	YDL061C	RPS29B	20385592	2010 Aug	Unstressed log-phase growth (control)	Positive	Indirect	Microarray analysis - wt vs TF mutant
YKL112W	ABF1	YDL062W	Uncharacterized	15192094	2004 Aug 13	Unstressed log-phase growth (control)	Positive	Indirect	Microarray analysis - wt vs TF mutant
YKL112W	ABF1	YDL063C	SYO1	15192094	2004 Aug 13	Unstressed log-phase growth (control)	Positive	Indirect	Microarray analysis - wt vs TF mutant
YKL112W	ABF1	YDL070W	BDF2	20385592	2010 Aug	Unstressed log-phase growth (control)	Negative	Indirect	Microarray analysis - wt vs TF mutant
YKL112W	ABF1	YDL076C	RXT3	16880382	2006 Aug 8	Carbon source quality/availability	Positive	Indirect	Microarray analysis (WT vs TF overexpression)
YKL112W	ABF1	YDL076C	RXT3	20385592	2010 Aug	Unstressed log-phase growth (control)	Positive	Indirect	Microarray analysis - wt vs TF mutant
YKL112W	ABF1	YDL081C	RPP1A	15192094	2004 Aug 13	Unstressed log-phase growth (control)	N/A	Direct	ChIP
YKL112W	ABF1	YDL081C	RPP1A	27016735	2016 Jul 27	Stress	Positive	Direct	RT-PCR - wt vs TFBS mutant
YKL112W	ABF1	YDL105W	NSE4	15343339	2004 Sep 2	N/A	N/A	Direct	Chip-on-chip
YKL112W	ABF1	YDL106C	PHO2	15343339	2004 Sep 2	N/A	N/A	Direct	Chip-on-chip
YKL112W	ABF1	YDL108W	KIN28	20385592	2010 Aug	Unstressed log-phase growth (control)	Positive	Indirect	Microarray analysis - wt vs TF mutant
YKL112W	ABF1	YDL116W	NUP84	15343339	2004 Sep 2	N/A	N/A	Direct	Chip-on-chip
YKL112W	ABF1	YDL116W	NUP84	16709784	2006 May 19	N/A	N/A	Direct	Chip-on-chip
YKL112W	ABF1	YDL122W	UBP1	15343339	2004 Sep 2	N/A	N/A	Direct	Chip-on-chip
YKL112W	ABF1	YDL122W	UBP1	16709784	2006 May 19	N/A	N/A	Direct	Chip-on-chip
YKL112W	ABF1	YDL138W	RGT2	20385592	2010 Aug	Unstressed log-phase growth (control)	Positive	Indirect	Microarray analysis - wt vs TF mutant
YKL112W	ABF1	YDL140C	RPO21	8948647	1996 Nov 15	Unstressed log-phase growth (control)	Positive	Indirect	LacZ - wt vs TF mutant
YKL112W	ABF1	YDL145C	COP1	15343339	2004 Sep 2	N/A	N/A	Direct	Chip-on-chip
YKL112W	ABF1	YDL147W	RPN5	16709784	2006 May 19	N/A	N/A	Direct	Chip-on-chip
YKL112W	ABF1	YDL148C	NOP14	16709784	2006 May 19	N/A	N/A	Direct	Chip-on-chip
YKL112W	ABF1	YDL148C	NOP14	28158860	2017 May 5	Unstressed log-phase growth (control)	N/A	Direct	ChIP-seq
YKL112W	ABF1	YDL156W	CMR1	20385592	2010 Aug	Unstressed log-phase growth (control)	Positive	Indirect	Microarray analysis - wt vs TF mutant
YKL112W	ABF1	YDL159W	STE7	15343339	2004 Sep 2	N/A	N/A	Direct	Chip-on-chip
YKL112W	ABF1	YDL160C	DHH1	15343339	2004 Sep 2	N/A	N/A	Direct	Chip-on-chip
YKL112W	ABF1	YDL163W	Uncharacterized	20385592	2010 Aug	Unstressed log-phase growth (control)	Positive	Indirect	Microarray analysis - wt vs TF mutant
YKL112W	ABF1	YDL167C	NRP1	20385592	2010 Aug	Unstressed log-phase growth (control)	Positive	Indirect	Microarray analysis - wt vs TF mutant
YKL112W	ABF1	YDL170W	UGA3	16553884	2006 Mar	N/A	N/A	Direct	LacZ - Wild type vs. target promoter mutant
YKL112W	ABF1	YDL171C	GLT1	16553884	2006 Mar	Nitrogen source quality/availability	Positive	Indirect	lacZ - wt vs. Mutant promoter region
YKL112W	ABF1	YDL188C	PPH22	20385592	2010 Aug	Unstressed log-phase growth (control)	Positive	Indirect	Microarray analysis - wt vs TF mutant
YKL112W	ABF1	YDL189W	RBS1	15343339	2004 Sep 2	N/A	N/A	Direct	Chip-on-chip
YKL112W	ABF1	YDL189W	RBS1	16709784	2006 May 19	N/A	N/A	Direct	Chip-on-chip
YKL112W	ABF1	YDL190C	UFD2	15343339	2004 Sep 2	N/A	N/A	Direct	Chip-on-chip
YKL112W	ABF1	YDL190C	UFD2	16709784	2006 May 19	N/A	N/A	Direct	Chip-on-chip
YKL112W	ABF1	YDL193W	NUS1	15343339	2004 Sep 2	N/A	N/A	Direct	Chip-on-chip
YKL112W	ABF1	YDL193W	NUS1	16709784	2006 May 19	N/A	N/A	Direct	Chip-on-chip
YKL112W	ABF1	YDL200C	MGT1	20385592	2010 Aug	Unstressed log-phase growth (control)	Positive	Indirect	Microarray analysis - wt vs TF mutant
YKL112W	ABF1	YDL208W	NHP2	15343339	2004 Sep 2	N/A	N/A	Direct	Chip-on-chip
YKL112W	ABF1	YDL208W	NHP2	28158860	2017 May 5	Unstressed log-phase growth (control)	N/A	Direct	ChIP-seq
YKL112W	ABF1	YDL209C	CWC2	15343339	2004 Sep 2	N/A	N/A	Direct	Chip-on-chip
YKL112W	ABF1	YDL229W	SSB1	20385592	2010 Aug	Unstressed log-phase growth (control)	Positive	Indirect	Microarray analysis - wt vs TF mutant
YKL112W	ABF1	YDL245C	HXT15	20385592	2010 Aug	Unstressed log-phase growth (control)	Positive	Indirect	Microarray analysis - wt vs TF mutant
YKL112W	ABF1	YDR011W	SNQ2	16880382	2006 Aug 8	Carbon source quality/availability	Positive	Indirect	Microarray analysis (WT vs TF overexpression)
YKL112W	ABF1	YDR011W	SNQ2	20385592	2010 Aug	Unstressed log-phase growth (control)	Positive	Indirect	Microarray analysis - wt vs TF mutant
YKL112W	ABF1	YDR012W	RPL4B	27016735	2016 Jul 27	Unstressed log-phase growth (control)	Positive	Direct	RT-PCR - wt vs TFBS mutant
YKL112W	ABF1	YDR015C	Uncharacterized	20385592	2010 Aug	Unstressed log-phase growth (control)	Positive	Indirect	Microarray analysis - wt vs TF mutant
YKL112W	ABF1	YDR018C	YDR018C	20385592	2010 Aug	Unstressed log-phase growth (control)	Positive	Indirect	Microarray analysis - wt vs TF mutant
YKL112W	ABF1	YDR027C	VPS54	20385592	2010 Aug	Unstressed log-phase growth (control)	Negative	Indirect	Microarray analysis - wt vs TF mutant
YKL112W	ABF1	YDR029W	YDR029W	20385592	2010 Aug	Unstressed log-phase growth (control)	Negative	Indirect	Microarray analysis - wt vs TF mutant
YKL112W	ABF1	YDR034C-A	YDR034C-A	20385592	2010 Aug	Unstressed log-phase growth (control)	Positive	Indirect	Microarray analysis - wt vs TF mutant
YKL112W	ABF1	YDR034C-D	YDR034C-D	20385592	2010 Aug	Unstressed log-phase growth (control)	Positive	Indirect	Microarray analysis - wt vs TF mutant
YKL112W	ABF1	YDR035W	ARO3	7752892	1995 Jan	In vitro	N/A	Direct	EMSA
YKL112W	ABF1	YDR035W	ARO3	15192094	2004 Aug 13	Unstressed log-phase growth (control)	N/A	Direct	ChIP
YKL112W	ABF1	YDR035W	ARO3	25748434	2015 Mar 5	Stress	N/A	Direct	ChIP
YKL112W	ABF1	YDR043C	NRG1	20385592	2010 Aug	Unstressed log-phase growth (control)	Positive	Indirect	Microarray analysis - wt vs TF mutant
YKL112W	ABF1	YDR046C	BAP3	10648791	2000 Feb 15	Unstressed log-phase growth (control)	Positive	Indirect	lacZ - wt vs. Mutant promoter region
YKL112W	ABF1	YDR072C	IPT1	20385592	2010 Aug	Unstressed log-phase growth (control)	Positive	Indirect	Microarray analysis - wt vs TF mutant
YKL112W	ABF1	YDR075W	PPH3	20385592	2010 Aug	Unstressed log-phase growth (control)	Positive	Indirect	Microarray analysis - wt vs TF mutant
YKL112W	ABF1	YDR078C	SHU2	20385592	2010 Aug	Unstressed log-phase growth (control)	Positive	Indirect	Microarray analysis - wt vs TF mutant
YKL112W	ABF1	YDR083W	RRP8	28158860	2017 May 5	Unstressed log-phase growth (control)	N/A	Direct	ChIP-seq
YKL112W	ABF1	YDR094W	Uncharacterized	20385592	2010 Aug	Unstressed log-phase growth (control)	Positive	Indirect	Microarray analysis - wt vs TF mutant
YKL112W	ABF1	YDR098C	GRX3	20385592	2010 Aug	Unstressed log-phase growth (control)	Positive	Indirect	Microarray analysis - wt vs TF mutant
YKL112W	ABF1	YDR100W	TVP15	20385592	2010 Aug	Unstressed log-phase growth (control)	Positive	Indirect	Microarray analysis - wt vs TF mutant
YKL112W	ABF1	YDR105C	TMS1	20385592	2010 Aug	Unstressed log-phase growth (control)	Positive	Indirect	Microarray analysis - wt vs TF mutant
YKL112W	ABF1	YDR109C	YDR109C	20385592	2010 Aug	Unstressed log-phase growth (control)	Positive	Indirect	Microarray analysis - wt vs TF mutant
YKL112W	ABF1	YDR117C	TMA64	20385592	2010 Aug	Unstressed log-phase growth (control)	Positive	Indirect	Microarray analysis - wt vs TF mutant
YKL112W	ABF1	YDR119W	VBA4	20385592	2010 Aug	Unstressed log-phase growth (control)	Positive	Indirect	Microarray analysis - wt vs TF mutant
YKL112W	ABF1	YDR121W	DPB4	20385592	2010 Aug	Unstressed log-phase growth (control)	Positive	Indirect	Microarray analysis - wt vs TF mutant
YKL112W	ABF1	YDR124W	YDR124W	20385592	2010 Aug	Unstressed log-phase growth (control)	Positive	Indirect	Microarray analysis - wt vs TF mutant
YKL112W	ABF1	YDR126W	SWF1	20385592	2010 Aug	Unstressed log-phase growth (control)	Positive	Indirect	Microarray analysis - wt vs TF mutant
YKL112W	ABF1	YDR127W	ARO1	20385592	2010 Aug	Unstressed log-phase growth (control)	Positive	Indirect	Microarray analysis - wt vs TF mutant
YKL112W	ABF1	YDR130C	FIN1	15192094	2004 Aug 13	Unstressed log-phase growth (control)	Positive	Indirect	Microarray analysis - wt vs TF mutant
YKL112W	ABF1	YDR130C	FIN1	15343339	2004 Sep 2	N/A	N/A	Direct	Chip-on-chip
YKL112W	ABF1	YDR132C	YDR132C	20385592	2010 Aug	Unstressed log-phase growth (control)	Positive	Indirect	Microarray analysis - wt vs TF mutant
YKL112W	ABF1	YDR146C	SWI5	20385592	2010 Aug	Unstressed log-phase growth (control)	Negative	Indirect	Microarray analysis - wt vs TF mutant
YKL112W	ABF1	YDR156W	RPA14	20385592	2010 Aug	Unstressed log-phase growth (control)	Positive	Indirect	Microarray analysis - wt vs TF mutant
YKL112W	ABF1	YDR157W	YDR157W	20385592	2010 Aug	Unstressed log-phase growth (control)	Positive	Indirect	Microarray analysis - wt vs TF mutant
YKL112W	ABF1	YDR158W	HOM2	20385592	2010 Aug	Unstressed log-phase growth (control)	Positive	Indirect	Microarray analysis - wt vs TF mutant
YKL112W	ABF1	YDR159W	SAC3	20385592	2010 Aug	Unstressed log-phase growth (control)	Positive	Indirect	Microarray analysis - wt vs TF mutant
YKL112W	ABF1	YDR165W	TRM82	20385592	2010 Aug	Unstressed log-phase growth (control)	Positive	Indirect	Microarray analysis - wt vs TF mutant
YKL112W	ABF1	YDR168W	CDC37	20385592	2010 Aug	Unstressed log-phase growth (control)	Negative	Indirect	Microarray analysis - wt vs TF mutant
YKL112W	ABF1	YDR171W	HSP42	16880382	2006 Aug 8	Carbon source quality/availability	Positive	Indirect	Microarray analysis (WT vs TF overexpression)
YKL112W	ABF1	YDR171W	HSP42	18305101	2008 May	Stress	Positive	Indirect	microarray
YKL112W	ABF1	YDR171W	HSP42	20385592	2010 Aug	Unstressed log-phase growth (control)	Positive	Indirect	Microarray analysis - wt vs TF mutant
YKL112W	ABF1	YDR172W	SUP35	9364750	1997 Oct	Unstressed log-phase growth (control)	Positive	Indirect	Northern - wt vs. Mutant promoter region
YKL112W	ABF1	YDR174W	HMO1	20385592	2010 Aug	Unstressed log-phase growth (control)	Positive	Indirect	Microarray analysis - wt vs TF mutant
YKL112W	ABF1	YDR178W	SDH4	20385592	2010 Aug	Unstressed log-phase growth (control)	Positive	Indirect	Microarray analysis - wt vs TF mutant
YKL112W	ABF1	YDR185C	UPS3	20385592	2010 Aug	Unstressed log-phase growth (control)	Positive	Indirect	Microarray analysis - wt vs TF mutant
YKL112W	ABF1	YDR194C	MSS116	15343339	2004 Sep 2	N/A	N/A	Direct	Chip-on-chip
YKL112W	ABF1	YDR194C	MSS116	20385592	2010 Aug	Unstressed log-phase growth (control)	Negative	Indirect	Microarray analysis - wt vs TF mutant
YKL112W	ABF1	YDR195W	REF2	15343339	2004 Sep 2	N/A	N/A	Direct	Chip-on-chip
YKL112W	ABF1	YDR199W	Uncharacterized	20385592	2010 Aug	Unstressed log-phase growth (control)	Positive	Indirect	Microarray analysis - wt vs TF mutant
YKL112W	ABF1	YDR210C-D	YDR210C-D	20385592	2010 Aug	Unstressed log-phase growth (control)	Negative	Indirect	Microarray analysis - wt vs TF mutant
YKL112W	ABF1	YDR211W	GCD6	20385592	2010 Aug	Unstressed log-phase growth (control)	Negative	Indirect	Microarray analysis - wt vs TF mutant
YKL112W	ABF1	YDR211W	GCD6	28158860	2017 May 5	Unstressed log-phase growth (control)	N/A	Direct	ChIP-seq
YKL112W	ABF1	YDR212W	TCP1	20385592	2010 Aug	Unstressed log-phase growth (control)	Positive	Indirect	Microarray analysis - wt vs TF mutant
YKL112W	ABF1	YDR214W	AHA1	16880382	2006 Aug 8	Carbon source quality/availability	Positive	Indirect	Microarray analysis (WT vs TF overexpression)
YKL112W	ABF1	YDR214W	AHA1	20385592	2010 Aug	Unstressed log-phase growth (control)	Positive	Indirect	Microarray analysis - wt vs TF mutant
YKL112W	ABF1	YDR224C	HTB1	20385592	2010 Aug	Unstressed log-phase growth (control)	Positive	Indirect	Microarray analysis - wt vs TF mutant
YKL112W	ABF1	YDR233C	RTN1	15343339	2004 Sep 2	N/A	N/A	Direct	Chip-on-chip
YKL112W	ABF1	YDR233C	RTN1	20385592	2010 Aug	Unstressed log-phase growth (control)	Positive	Indirect	Microarray analysis - wt vs TF mutant
YKL112W	ABF1	YDR234W	LYS4	15343339	2004 Sep 2	N/A	N/A	Direct	Chip-on-chip
YKL112W	ABF1	YDR245W	MNN10	15343339	2004 Sep 2	N/A	N/A	Direct	Chip-on-chip
YKL112W	ABF1	YDR245W	MNN10	16709784	2006 May 19	N/A	N/A	Direct	Chip-on-chip
YKL112W	ABF1	YDR245W	MNN10	17158163	2007	Stress	Positive	Indirect	Microarray analysis (WT vs TF mutant)
YKL112W	ABF1	YDR251W	PAM1	20385592	2010 Aug	Unstressed log-phase growth (control)	Positive	Indirect	Microarray analysis - wt vs TF mutant
YKL112W	ABF1	YDR252W	BTT1	20385592	2010 Aug	Unstressed log-phase growth (control)	Positive	Indirect	Microarray analysis - wt vs TF mutant
YKL112W	ABF1	YDR255C	RMD5	20385592	2010 Aug	Unstressed log-phase growth (control)	Positive	Indirect	Microarray analysis - wt vs TF mutant
YKL112W	ABF1	YDR256C	CTA1	20385592	2010 Aug	Unstressed log-phase growth (control)	Positive	Indirect	Microarray analysis - wt vs TF mutant
YKL112W	ABF1	YDR265W	PEX10	20385592	2010 Aug	Unstressed log-phase growth (control)	Positive	Indirect	Microarray analysis - wt vs TF mutant
YKL112W	ABF1	YDR280W	RRP45	15343339	2004 Sep 2	N/A	N/A	Direct	Chip-on-chip
YKL112W	ABF1	YDR280W	RRP45	16709784	2006 May 19	N/A	N/A	Direct	Chip-on-chip
YKL112W	ABF1	YDR283C	GCN2	15343339	2004 Sep 2	N/A	N/A	Direct	Chip-on-chip
YKL112W	ABF1	YDR283C	GCN2	16709784	2006 May 19	N/A	N/A	Direct	Chip-on-chip
YKL112W	ABF1	YDR283C	GCN2	20385592	2010 Aug	Unstressed log-phase growth (control)	Positive	Indirect	Microarray analysis - wt vs TF mutant
YKL112W	ABF1	YDR284C	DPP1	20385592	2010 Aug	Unstressed log-phase growth (control)	Positive	Indirect	Microarray analysis - wt vs TF mutant
YKL112W	ABF1	YDR289C	RTT103	20385592	2010 Aug	Unstressed log-phase growth (control)	Positive	Indirect	Microarray analysis - wt vs TF mutant
YKL112W	ABF1	YDR295C	HDA2	15343339	2004 Sep 2	N/A	N/A	Direct	Chip-on-chip
YKL112W	ABF1	YDR295C	HDA2	16709784	2006 May 19	N/A	N/A	Direct	Chip-on-chip
YKL112W	ABF1	YDR296W	MHR1	15343339	2004 Sep 2	N/A	N/A	Direct	Chip-on-chip
YKL112W	ABF1	YDR296W	MHR1	16709784	2006 May 19	N/A	N/A	Direct	Chip-on-chip
YKL112W	ABF1	YDR297W	SUR2	20385592	2010 Aug	Unstressed log-phase growth (control)	Positive	Indirect	Microarray analysis - wt vs TF mutant
YKL112W	ABF1	YDR298C	ATP5	20385592	2010 Aug	Unstressed log-phase growth (control)	Positive	Indirect	Microarray analysis - wt vs TF mutant
YKL112W	ABF1	YDR301W	CFT1	20385592	2010 Aug	Unstressed log-phase growth (control)	Positive	Indirect	Microarray analysis - wt vs TF mutant
YKL112W	ABF1	YDR304C	CPR5	20385592	2010 Aug	Unstressed log-phase growth (control)	Positive	Indirect	Microarray analysis - wt vs TF mutant
YKL112W	ABF1	YDR309C	GIC2	20385592	2010 Aug	Unstressed log-phase growth (control)	Positive	Indirect	Microarray analysis - wt vs TF mutant
YKL112W	ABF1	YDR311W	TFB1	15192094	2004 Aug 13	Unstressed log-phase growth (control)	Positive	Indirect	Microarray analysis - wt vs TF mutant
YKL112W	ABF1	YDR311W	TFB1	17158163	2007	Stress	Positive	Indirect	Microarray analysis (WT vs TF mutant)
YKL112W	ABF1	YDR312W	SSF2	15343339	2004 Sep 2	N/A	N/A	Direct	Chip-on-chip
YKL112W	ABF1	YDR312W	SSF2	17158163	2007	Stress	Positive	Indirect	Microarray analysis (WT vs TF mutant)
YKL112W	ABF1	YDR312W	SSF2	28158860	2017 May 5	Unstressed log-phase growth (control)	N/A	Direct	ChIP-seq
YKL112W	ABF1	YDR313C	PIB1	20385592	2010 Aug	Unstressed log-phase growth (control)	Positive	Indirect	Microarray analysis - wt vs TF mutant
YKL112W	ABF1	YDR314C	RAD34	20385592	2010 Aug	Unstressed log-phase growth (control)	Positive	Indirect	Microarray analysis - wt vs TF mutant
YKL112W	ABF1	YDR319C	YFT2	20385592	2010 Aug	Unstressed log-phase growth (control)	Positive	Indirect	Microarray analysis - wt vs TF mutant
YKL112W	ABF1	YDR321W	ASP1	20385592	2010 Aug	Unstressed log-phase growth (control)	Positive	Indirect	Microarray analysis - wt vs TF mutant
YKL112W	ABF1	YDR322W	MRPL35	20385592	2010 Aug	Unstressed log-phase growth (control)	Positive	Indirect	Microarray analysis - wt vs TF mutant
YKL112W	ABF1	YDR326C	YSP2	15343339	2004 Sep 2	N/A	N/A	Direct	Chip-on-chip
YKL112W	ABF1	YDR327W	Uncharacterized	15343339	2004 Sep 2	N/A	N/A	Direct	Chip-on-chip
YKL112W	ABF1	YDR329C	PEX3	15343339	2004 Sep 2	N/A	N/A	Direct	Chip-on-chip
YKL112W	ABF1	YDR329C	PEX3	16709784	2006 May 19	N/A	N/A	Direct	Chip-on-chip
YKL112W	ABF1	YDR330W	UBX5	15343339	2004 Sep 2	N/A	N/A	Direct	Chip-on-chip
YKL112W	ABF1	YDR330W	UBX5	16709784	2006 May 19	N/A	N/A	Direct	Chip-on-chip
YKL112W	ABF1	YDR339C	FCF1	15343339	2004 Sep 2	N/A	N/A	Direct	Chip-on-chip
YKL112W	ABF1	YDR340W	Uncharacterized	15343339	2004 Sep 2	N/A	N/A	Direct	Chip-on-chip
YKL112W	ABF1	YDR340W	Uncharacterized	20385592	2010 Aug	Unstressed log-phase growth (control)	Positive	Indirect	Microarray analysis - wt vs TF mutant
YKL112W	ABF1	YDR341C	YDR341C	20385592	2010 Aug	Unstressed log-phase growth (control)	Positive	Indirect	Microarray analysis - wt vs TF mutant
YKL112W	ABF1	YDR345C	HXT3	20385592	2010 Aug	Unstressed log-phase growth (control)	Positive	Indirect	Microarray analysis - wt vs TF mutant
YKL112W	ABF1	YDR347W	MRP1	20385592	2010 Aug	Unstressed log-phase growth (control)	Positive	Indirect	Microarray analysis - wt vs TF mutant
YKL112W	ABF1	YDR354W	TRP4	20385592	2010 Aug	Unstressed log-phase growth (control)	Positive	Indirect	Microarray analysis - wt vs TF mutant
YKL112W	ABF1	YDR361C	BCP1	15343339	2004 Sep 2	N/A	N/A	Direct	Chip-on-chip
YKL112W	ABF1	YDR361C	BCP1	16709784	2006 May 19	N/A	N/A	Direct	Chip-on-chip
YKL112W	ABF1	YDR365W-A	YDR365W-A	20385592	2010 Aug	Unstressed log-phase growth (control)	Positive	Indirect	Microarray analysis - wt vs TF mutant
YKL112W	ABF1	YDR365W-B	YDR365W-B	20385592	2010 Aug	Unstressed log-phase growth (control)	Positive	Indirect	Microarray analysis - wt vs TF mutant
YKL112W	ABF1	YDR366C	YDR366C	20385592	2010 Aug	Unstressed log-phase growth (control)	Positive	Indirect	Microarray analysis - wt vs TF mutant
YKL112W	ABF1	YDR379W	RGA2	20385592	2010 Aug	Unstressed log-phase growth (control)	Positive	Indirect	Microarray analysis - wt vs TF mutant
YKL112W	ABF1	YDR384C	ATO3	15343339	2004 Sep 2	N/A	N/A	Direct	Chip-on-chip
YKL112W	ABF1	YDR384C	ATO3	20385592	2010 Aug	Unstressed log-phase growth (control)	Positive	Indirect	Microarray analysis - wt vs TF mutant
YKL112W	ABF1	YDR385W	EFT2	15343339	2004 Sep 2	N/A	N/A	Direct	Chip-on-chip
YKL112W	ABF1	YDR385W	EFT2	28158860	2017 May 5	Unstressed log-phase growth (control)	N/A	Direct	ChIP-seq
YKL112W	ABF1	YDR398W	UTP5	28158860	2017 May 5	Unstressed log-phase growth (control)	N/A	Direct	ChIP-seq
YKL112W	ABF1	YDR400W	URH1	20385592	2010 Aug	Unstressed log-phase growth (control)	Positive	Indirect	Microarray analysis - wt vs TF mutant
YKL112W	ABF1	YDR403W	DIT1	15192094	2004 Aug 13	Unstressed log-phase growth (control)	Negative	Indirect	Microarray analysis - wt vs TF mutant
YKL112W	ABF1	YDR403W	DIT1	16880382	2006 Aug 8	Carbon source quality/availability	Positive	Indirect	Microarray analysis (WT vs TF overexpression)
YKL112W	ABF1	YDR404C	RPB7	15343339	2004 Sep 2	N/A	N/A	Direct	Chip-on-chip
YKL112W	ABF1	YDR404C	RPB7	20385592	2010 Aug	Unstressed log-phase growth (control)	Positive	Indirect	Microarray analysis - wt vs TF mutant
YKL112W	ABF1	YDR405W	MRP20	15343339	2004 Sep 2	N/A	N/A	Direct	Chip-on-chip
YKL112W	ABF1	YDR410C	STE14	20385592	2010 Aug	Unstressed log-phase growth (control)	Positive	Indirect	Microarray analysis - wt vs TF mutant
YKL112W	ABF1	YDR411C	DFM1	20385592	2010 Aug	Unstressed log-phase growth (control)	Positive	Indirect	Microarray analysis - wt vs TF mutant
YKL112W	ABF1	YDR422C	SIP1	15343339	2004 Sep 2	N/A	N/A	Direct	Chip-on-chip
YKL112W	ABF1	YDR423C	CAD1	16709784	2006 May 19	N/A	N/A	Direct	Chip-on-chip
YKL112W	ABF1	YDR432W	NPL3	28158860	2017 May 5	Unstressed log-phase growth (control)	N/A	Direct	ChIP-seq
YKL112W	ABF1	YDR438W	THI74	20385592	2010 Aug	Unstressed log-phase growth (control)	Positive	Indirect	Microarray analysis - wt vs TF mutant
YKL112W	ABF1	YDR442W	Uncharacterized	20385592	2010 Aug	Unstressed log-phase growth (control)	Positive	Indirect	Microarray analysis - wt vs TF mutant
YKL112W	ABF1	YDR444W	YDR444W	20385592	2010 Aug	Unstressed log-phase growth (control)	Negative	Indirect	Microarray analysis - wt vs TF mutant
YKL112W	ABF1	YDR452W	PPN1	20385592	2010 Aug	Unstressed log-phase growth (control)	Positive	Indirect	Microarray analysis - wt vs TF mutant
YKL112W	ABF1	YDR454C	GUK1	15343339	2004 Sep 2	N/A	N/A	Direct	Chip-on-chip
YKL112W	ABF1	YDR455C	Uncharacterized	15192094	2004 Aug 13	Unstressed log-phase growth (control)	Positive	Indirect	Microarray analysis - wt vs TF mutant
YKL112W	ABF1	YDR456W	NHX1	15192094	2004 Aug 13	Unstressed log-phase growth (control)	Positive	Indirect	Microarray analysis - wt vs TF mutant
YKL112W	ABF1	YDR456W	NHX1	15343339	2004 Sep 2	N/A	N/A	Direct	Chip-on-chip
YKL112W	ABF1	YDR456W	NHX1	17158163	2007	Stress	Positive	Indirect	Microarray analysis (WT vs TF mutant)
YKL112W	ABF1	YDR460W	TFB3	20385592	2010 Aug	Unstressed log-phase growth (control)	Positive	Indirect	Microarray analysis - wt vs TF mutant
YKL112W	ABF1	YDR461W	MFA1	15192094	2004 Aug 13	Unstressed log-phase growth (control)	Negative	Indirect	Northern Blotting - wt vs TF mutant
YKL112W	ABF1	YDR461W	MFA1	16880382	2006 Aug 8	Carbon source quality/availability	Positive	Indirect	Microarray analysis (WT vs TF overexpression)
YKL112W	ABF1	YDR461W	MFA1	20385592	2010 Aug	Unstressed log-phase growth (control)	Positive	Indirect	Microarray analysis - wt vs TF mutant
YKL112W	ABF1	YDR462W	MRPL28	16880382	2006 Aug 8	Carbon source quality/availability	Negative	Indirect	Microarray analysis (WT vs TF overexpression)
YKL112W	ABF1	YDR462W	MRPL28	20385592	2010 Aug	Unstressed log-phase growth (control)	Positive	Indirect	Microarray analysis - wt vs TF mutant
YKL112W	ABF1	YDR463W	STP1	15343339	2004 Sep 2	N/A	N/A	Direct	Chip-on-chip
YKL112W	ABF1	YDR464W	SPP41	16709784	2006 May 19	N/A	N/A	Direct	Chip-on-chip
YKL112W	ABF1	YDR473C	PRP3	20385592	2010 Aug	Unstressed log-phase growth (control)	Positive	Indirect	Microarray analysis - wt vs TF mutant
YKL112W	ABF1	YDR476C	YDR476C	15192094	2004 Aug 13	Unstressed log-phase growth (control)	Positive	Indirect	Microarray analysis - wt vs TF mutant
YKL112W	ABF1	YDR476C	YDR476C	20385592	2010 Aug	Unstressed log-phase growth (control)	Positive	Indirect	Microarray analysis - wt vs TF mutant
YKL112W	ABF1	YDR486C	VPS60	20385592	2010 Aug	Unstressed log-phase growth (control)	Positive	Indirect	Microarray analysis - wt vs TF mutant
YKL112W	ABF1	YDR487C	RIB3	20385592	2010 Aug	Unstressed log-phase growth (control)	Positive	Indirect	Microarray analysis - wt vs TF mutant
YKL112W	ABF1	YDR505C	PSP1	20385592	2010 Aug	Unstressed log-phase growth (control)	Positive	Indirect	Microarray analysis - wt vs TF mutant
YKL112W	ABF1	YDR511W	SDH7	16880382	2006 Aug 8	Carbon source quality/availability	Negative	Indirect	Microarray analysis (WT vs TF overexpression)
YKL112W	ABF1	YDR511W	SDH7	20385592	2010 Aug	Unstressed log-phase growth (control)	Positive	Indirect	Microarray analysis - wt vs TF mutant
YKL112W	ABF1	YDR513W	GRX2	20385592	2010 Aug	Unstressed log-phase growth (control)	Positive	Indirect	Microarray analysis - wt vs TF mutant
YKL112W	ABF1	YDR517W	GRH1	20385592	2010 Aug	Unstressed log-phase growth (control)	Positive	Indirect	Microarray analysis - wt vs TF mutant
YKL112W	ABF1	YDR519W	FPR2	20385592	2010 Aug	Unstressed log-phase growth (control)	Positive	Indirect	Microarray analysis - wt vs TF mutant
YKL112W	ABF1	YDR520C	URC2	20385592	2010 Aug	Unstressed log-phase growth (control)	Positive	Indirect	Microarray analysis - wt vs TF mutant
YKL112W	ABF1	YDR523C	SPS1	15192094	2004 Aug 13	Unstressed log-phase growth (control)	Negative	Indirect	Microarray analysis - wt vs TF mutant
YKL112W	ABF1	YDR523C	SPS1	16880382	2006 Aug 8	Carbon source quality/availability	Positive	Indirect	Microarray analysis (WT vs TF overexpression)
YKL112W	ABF1	YDR525W	API2	20385592	2010 Aug	Unstressed log-phase growth (control)	Positive	Indirect	Microarray analysis - wt vs TF mutant
YKL112W	ABF1	YDR525W-A	SNA2	20385592	2010 Aug	Unstressed log-phase growth (control)	Positive	Indirect	Microarray analysis - wt vs TF mutant
YKL112W	ABF1	YDR536W	STL1	16880382	2006 Aug 8	Carbon source quality/availability	Positive	Indirect	Microarray analysis (WT vs TF overexpression)
YKL112W	ABF1	YDR536W	STL1	20385592	2010 Aug	Unstressed log-phase growth (control)	Positive	Indirect	Microarray analysis - wt vs TF mutant
YKL112W	ABF1	YDR537C	Uncharacterized	20385592	2010 Aug	Unstressed log-phase growth (control)	Positive	Indirect	Microarray analysis - wt vs TF mutant
YKL112W	ABF1	YDR544C	Uncharacterized	20385592	2010 Aug	Unstressed log-phase growth (control)	Negative	Indirect	Microarray analysis - wt vs TF mutant
YKL112W	ABF1	YEL005C	VAB2	20385592	2010 Aug	Unstressed log-phase growth (control)	Positive	Indirect	Microarray analysis - wt vs TF mutant
YKL112W	ABF1	YEL017C-A	PMP2	15343339	2004 Sep 2	N/A	N/A	Direct	Chip-on-chip
YKL112W	ABF1	YEL017W	GTT3	15343339	2004 Sep 2	N/A	N/A	Direct	Chip-on-chip
YKL112W	ABF1	YEL017W	GTT3	20385592	2010 Aug	Unstressed log-phase growth (control)	Positive	Indirect	Microarray analysis - wt vs TF mutant
YKL112W	ABF1	YEL023C	YEL023C	20385592	2010 Aug	Unstressed log-phase growth (control)	Positive	Indirect	Microarray analysis - wt vs TF mutant
YKL112W	ABF1	YEL024W	RIP1	20385592	2010 Aug	Unstressed log-phase growth (control)	Positive	Indirect	Microarray analysis - wt vs TF mutant
YKL112W	ABF1	YEL034W	HYP2	20385592	2010 Aug	Unstressed log-phase growth (control)	Positive	Indirect	Microarray analysis - wt vs TF mutant
YKL112W	ABF1	YEL036C	ANP1	20385592	2010 Aug	Unstressed log-phase growth (control)	Positive	Indirect	Microarray analysis - wt vs TF mutant
YKL112W	ABF1	YEL037C	RAD23	15343339	2004 Sep 2	N/A	N/A	Direct	Chip-on-chip
YKL112W	ABF1	YEL044W	IES6	20385592	2010 Aug	Unstressed log-phase growth (control)	Positive	Indirect	Microarray analysis - wt vs TF mutant
YKL112W	ABF1	YEL057C	SDD1	20385592	2010 Aug	Unstressed log-phase growth (control)	Positive	Indirect	Microarray analysis - wt vs TF mutant
YKL112W	ABF1	YEL064C	AVT2	20385592	2010 Aug	Unstressed log-phase growth (control)	Positive	Indirect	Microarray analysis - wt vs TF mutant
YKL112W	ABF1	YEL066W	HPA3	20385592	2010 Aug	Unstressed log-phase growth (control)	Positive	Indirect	Microarray analysis - wt vs TF mutant
YKL112W	ABF1	YER003C	PMI40	20385592	2010 Aug	Unstressed log-phase growth (control)	Positive	Indirect	Microarray analysis - wt vs TF mutant
YKL112W	ABF1	YER005W	YND1	20385592	2010 Aug	Unstressed log-phase growth (control)	Positive	Indirect	Microarray analysis - wt vs TF mutant
YKL112W	ABF1	YER006W	NUG1	20385592	2010 Aug	Unstressed log-phase growth (control)	Positive	Indirect	Microarray analysis - wt vs TF mutant
YKL112W	ABF1	YER007C-A	TMA20	20385592	2010 Aug	Unstressed log-phase growth (control)	Positive	Indirect	Microarray analysis - wt vs TF mutant
YKL112W	ABF1	YER023W	PRO3	15192094	2004 Aug 13	Unstressed log-phase growth (control)	Positive	Indirect	Northern Blotting - wt vs TF mutant
YKL112W	ABF1	YER023W	PRO3	20385592	2010 Aug	Unstressed log-phase growth (control)	Positive	Indirect	Microarray analysis - wt vs TF mutant
YKL112W	ABF1	YER026C	CHO1	20385592	2010 Aug	Unstressed log-phase growth (control)	Positive	Indirect	Microarray analysis - wt vs TF mutant
YKL112W	ABF1	YER027C	GAL83	20385592	2010 Aug	Unstressed log-phase growth (control)	Positive	Indirect	Microarray analysis - wt vs TF mutant
YKL112W	ABF1	YER033C	ZRG8	20385592	2010 Aug	Unstressed log-phase growth (control)	Positive	Indirect	Microarray analysis - wt vs TF mutant
YKL112W	ABF1	YER035W	EDC2	20385592	2010 Aug	Unstressed log-phase growth (control)	Positive	Indirect	Microarray analysis - wt vs TF mutant
YKL112W	ABF1	YER041W	YEN1	15192094	2004 Aug 13	Unstressed log-phase growth (control)	Positive	Indirect	Microarray analysis - wt vs TF mutant
YKL112W	ABF1	YER044C	ERG28	15192094	2004 Aug 13	Unstressed log-phase growth (control)	Positive	Indirect	Microarray analysis - wt vs TF mutant
YKL112W	ABF1	YER051W	JHD1	20385592	2010 Aug	Unstressed log-phase growth (control)	Positive	Indirect	Microarray analysis - wt vs TF mutant
YKL112W	ABF1	YER052C	HOM3	20385592	2010 Aug	Unstressed log-phase growth (control)	Positive	Indirect	Microarray analysis - wt vs TF mutant
YKL112W	ABF1	YER056C	FCY2	16880382	2006 Aug 8	Carbon source quality/availability	Negative	Indirect	Microarray analysis (WT vs TF overexpression)
YKL112W	ABF1	YER056C	FCY2	28158860	2017 May 5	Unstressed log-phase growth (control)	N/A	Direct	ChIP-seq
YKL112W	ABF1	YER057C	HMF1	20385592	2010 Aug	Unstressed log-phase growth (control)	Positive	Indirect	Microarray analysis - wt vs TF mutant
YKL112W	ABF1	YER073W	ALD5	20385592	2010 Aug	Unstressed log-phase growth (control)	Positive	Indirect	Microarray analysis - wt vs TF mutant
YKL112W	ABF1	YER079W	YER079W	20385592	2010 Aug	Unstressed log-phase growth (control)	Positive	Indirect	Microarray analysis - wt vs TF mutant
YKL112W	ABF1	YER083C	GET2	20385592	2010 Aug	Unstressed log-phase growth (control)	Positive	Indirect	Microarray analysis - wt vs TF mutant
YKL112W	ABF1	YER087W	AIM10	20385592	2010 Aug	Unstressed log-phase growth (control)	Positive	Indirect	Microarray analysis - wt vs TF mutant
YKL112W	ABF1	YER088C	DOT6	20385592	2010 Aug	Unstressed log-phase growth (control)	Positive	Indirect	Microarray analysis - wt vs TF mutant
YKL112W	ABF1	YER091C	MET6	20385592	2010 Aug	Unstressed log-phase growth (control)	Positive	Indirect	Microarray analysis - wt vs TF mutant
YKL112W	ABF1	YER091C-A	Uncharacterized	20385592	2010 Aug	Unstressed log-phase growth (control)	Positive	Indirect	Microarray analysis - wt vs TF mutant
YKL112W	ABF1	YER103W	SSA4	15192094	2004 Aug 13	Unstressed log-phase growth (control)	Negative	Indirect	Microarray analysis - wt vs TF mutant
YKL112W	ABF1	YER103W	SSA4	16880382	2006 Aug 8	Carbon source quality/availability	Positive	Indirect	Microarray analysis (WT vs TF overexpression)
YKL112W	ABF1	YER103W	SSA4	20385592	2010 Aug	Unstressed log-phase growth (control)	Positive	Indirect	Microarray analysis - wt vs TF mutant
YKL112W	ABF1	YER105C	NUP157	20385592	2010 Aug	Unstressed log-phase growth (control)	Positive	Indirect	Microarray analysis - wt vs TF mutant
YKL112W	ABF1	YER107C	GLE2	17158163	2007	Stress	Positive	Indirect	Microarray analysis (WT vs TF mutant)
YKL112W	ABF1	YER107C	GLE2	20385592	2010 Aug	Unstressed log-phase growth (control)	Positive	Indirect	Microarray analysis - wt vs TF mutant
YKL112W	ABF1	YER119C	AVT6	20385592	2010 Aug	Unstressed log-phase growth (control)	Positive	Indirect	Microarray analysis - wt vs TF mutant
YKL112W	ABF1	YER119C-A	Uncharacterized	20385592	2010 Aug	Unstressed log-phase growth (control)	Positive	Indirect	Microarray analysis - wt vs TF mutant
YKL112W	ABF1	YER131W	RPS26B	20385592	2010 Aug	Unstressed log-phase growth (control)	Positive	Indirect	Microarray analysis - wt vs TF mutant
YKL112W	ABF1	YER138C	YER138C	20385592	2010 Aug	Unstressed log-phase growth (control)	Positive	Indirect	Microarray analysis - wt vs TF mutant
YKL112W	ABF1	YER138W-A	YER138W-A	20385592	2010 Aug	Unstressed log-phase growth (control)	Positive	Indirect	Microarray analysis - wt vs TF mutant
YKL112W	ABF1	YER141W	COX15	16880382	2006 Aug 8	Carbon source quality/availability	Positive	Indirect	Microarray analysis (WT vs TF overexpression)
YKL112W	ABF1	YER141W	COX15	20385592	2010 Aug	Unstressed log-phase growth (control)	Positive	Indirect	Microarray analysis - wt vs TF mutant
YKL112W	ABF1	YER148W	SPT15	9677425	1998 Jul 31	Unstressed log-phase growth (control)	N/A	Direct	DNA footprinting
YKL112W	ABF1	YER148W	SPT15	9722639	1998 Sep 15	In vitro	N/A	Direct	EMSA
YKL112W	ABF1	YER150W	SPI1	20385592	2010 Aug	Unstressed log-phase growth (control)	Positive	Indirect	Microarray analysis - wt vs TF mutant
YKL112W	ABF1	YER154W	OXA1	20385592	2010 Aug	Unstressed log-phase growth (control)	Positive	Indirect	Microarray analysis - wt vs TF mutant
YKL112W	ABF1	YER155C	BEM2	20385592	2010 Aug	Unstressed log-phase growth (control)	Positive	Indirect	Microarray analysis - wt vs TF mutant
YKL112W	ABF1	YER177W	BMH1	20385592	2010 Aug	Unstressed log-phase growth (control)	Positive	Indirect	Microarray analysis - wt vs TF mutant
YKL112W	ABF1	YER178W	PDA1	20385592	2010 Aug	Unstressed log-phase growth (control)	Positive	Indirect	Microarray analysis - wt vs TF mutant
YKL112W	ABF1	YER181C	YER181C	20385592	2010 Aug	Unstressed log-phase growth (control)	Positive	Indirect	Microarray analysis - wt vs TF mutant
YKL112W	ABF1	YER184C	TOG1	20385592	2010 Aug	Unstressed log-phase growth (control)	Positive	Indirect	Microarray analysis - wt vs TF mutant
YKL112W	ABF1	YER186C	YER186C	20385592	2010 Aug	Unstressed log-phase growth (control)	Positive	Indirect	Microarray analysis - wt vs TF mutant
YKL112W	ABF1	YER187W	YER187W	15192094	2004 Aug 13	Unstressed log-phase growth (control)	Negative	Indirect	Microarray analysis - wt vs TF mutant
YKL112W	ABF1	YER188W	YER188W	15192094	2004 Aug 13	Unstressed log-phase growth (control)	Negative	Indirect	Microarray analysis - wt vs TF mutant
YKL112W	ABF1	YFL010C	WWM1	20385592	2010 Aug	Unstressed log-phase growth (control)	Positive	Indirect	Microarray analysis - wt vs TF mutant
YKL112W	ABF1	YFL010W-A	AUA1	20385592	2010 Aug	Unstressed log-phase growth (control)	Positive	Indirect	Microarray analysis - wt vs TF mutant
YKL112W	ABF1	YFL011W	HXT10	20385592	2010 Aug	Unstressed log-phase growth (control)	Positive	Indirect	Microarray analysis - wt vs TF mutant
YKL112W	ABF1	YFL012W	YFL012W	20385592	2010 Aug	Unstressed log-phase growth (control)	Positive	Indirect	Microarray analysis - wt vs TF mutant
YKL112W	ABF1	YFL014W	HSP12	15192094	2004 Aug 13	Unstressed log-phase growth (control)	Negative	Indirect	Northern Blotting - wt vs TF mutant
YKL112W	ABF1	YFL014W	HSP12	16880382	2006 Aug 8	Carbon source quality/availability	Positive	Indirect	Microarray analysis (WT vs TF overexpression)
YKL112W	ABF1	YFL014W	HSP12	18305101	2008 May	Stress	Positive	Indirect	microarray
YKL112W	ABF1	YFL017W-A	SMX2	15343339	2004 Sep 2	N/A	N/A	Direct	Chip-on-chip
YKL112W	ABF1	YFL017W-A	SMX2	16880382	2006 Aug 8	Carbon source quality/availability	Negative	Indirect	Microarray analysis (WT vs TF overexpression)
YKL112W	ABF1	YFL018C	LPD1	15343339	2004 Sep 2	N/A	N/A	Direct	Chip-on-chip
YKL112W	ABF1	YFL018C	LPD1	16880382	2006 Aug 8	Carbon source quality/availability	Negative	Indirect	Microarray analysis (WT vs TF overexpression)
YKL112W	ABF1	YFL018C	LPD1	20385592	2010 Aug	Unstressed log-phase growth (control)	Positive	Indirect	Microarray analysis - wt vs TF mutant
YKL112W	ABF1	YFL023W	BUD27	20385592	2010 Aug	Unstressed log-phase growth (control)	Negative	Indirect	Microarray analysis - wt vs TF mutant
YKL112W	ABF1	YFL026W	STE2	20385592	2010 Aug	Unstressed log-phase growth (control)	Positive	Indirect	Microarray analysis - wt vs TF mutant
YKL112W	ABF1	YFL033C	RIM15	20385592	2010 Aug	Unstressed log-phase growth (control)	Positive	Indirect	Microarray analysis - wt vs TF mutant
YKL112W	ABF1	YFL034C-B	MOB2	20385592	2010 Aug	Unstressed log-phase growth (control)	Positive	Indirect	Microarray analysis - wt vs TF mutant
YKL112W	ABF1	YFL037W	TUB2	2684633	1989 Oct	N/A	N/A	Direct	DNA footprinting
YKL112W	ABF1	YFL038C	YPT1	2684633	1989 Oct	N/A	N/A	Direct	DNA footprinting
YKL112W	ABF1	YFL040W	YFL040W	20385592	2010 Aug	Unstressed log-phase growth (control)	Positive	Indirect	Microarray analysis - wt vs TF mutant
YKL112W	ABF1	YFL045C	SEC53	15192094	2004 Aug 13	Unstressed log-phase growth (control)	Positive	Indirect	Northern Blotting - wt vs TF mutant
YKL112W	ABF1	YFL045C	SEC53	17158163	2007	Stress	Positive	Indirect	Microarray analysis (WT vs TF mutant)
YKL112W	ABF1	YFL046W	FMP32	20385592	2010 Aug	Unstressed log-phase growth (control)	Positive	Indirect	Microarray analysis - wt vs TF mutant
YKL112W	ABF1	YFL047W	RGD2	15343339	2004 Sep 2	N/A	N/A	Direct	Chip-on-chip
YKL112W	ABF1	YFL048C	EMP47	15343339	2004 Sep 2	N/A	N/A	Direct	Chip-on-chip
YKL112W	ABF1	YFL048C	EMP47	16880382	2006 Aug 8	Carbon source quality/availability	Negative	Indirect	Microarray analysis (WT vs TF overexpression)
YKL112W	ABF1	YFL056C	AAD6	20385592	2010 Aug	Unstressed log-phase growth (control)	Positive	Indirect	Microarray analysis - wt vs TF mutant
YKL112W	ABF1	YFL059W	SNZ3	20385592	2010 Aug	Unstressed log-phase growth (control)	Positive	Indirect	Microarray analysis - wt vs TF mutant
YKL112W	ABF1	YFL060C	SNO3	16880382	2006 Aug 8	Carbon source quality/availability	Negative	Indirect	Microarray analysis (WT vs TF overexpression)
YKL112W	ABF1	YFL060C	SNO3	20385592	2010 Aug	Unstressed log-phase growth (control)	Positive	Indirect	Microarray analysis - wt vs TF mutant
YKL112W	ABF1	YFL062W	COS4	20385592	2010 Aug	Unstressed log-phase growth (control)	Positive	Indirect	Microarray analysis - wt vs TF mutant
YKL112W	ABF1	YFL065C	YFL065C	20385592	2010 Aug	Unstressed log-phase growth (control)	Positive	Indirect	Microarray analysis - wt vs TF mutant
YKL112W	ABF1	YFL068W	YFL068W	20385592	2010 Aug	Unstressed log-phase growth (control)	Positive	Indirect	Microarray analysis - wt vs TF mutant
YKL112W	ABF1	YFR009W	GCN20	28158860	2017 May 5	Unstressed log-phase growth (control)	N/A	Direct	ChIP-seq
YKL112W	ABF1	YFR010W	UBP6	16709784	2006 May 19	N/A	N/A	Direct	Chip-on-chip
YKL112W	ABF1	YFR011C	MIC19	20385592	2010 Aug	Unstressed log-phase growth (control)	Positive	Indirect	Microarray analysis - wt vs TF mutant
YKL112W	ABF1	YFR017C	IGD1	20385592	2010 Aug	Unstressed log-phase growth (control)	Positive	Indirect	Microarray analysis - wt vs TF mutant
YKL112W	ABF1	YFR018C	YFR018C	15192094	2004 Aug 13	Unstressed log-phase growth (control)	Positive	Indirect	Microarray analysis - wt vs TF mutant
YKL112W	ABF1	YFR018C	YFR018C	20385592	2010 Aug	Unstressed log-phase growth (control)	Positive	Indirect	Microarray analysis - wt vs TF mutant
YKL112W	ABF1	YFR022W	ROG3	20385592	2010 Aug	Unstressed log-phase growth (control)	Positive	Indirect	Microarray analysis - wt vs TF mutant
YKL112W	ABF1	YFR023W	PES4	15192094	2004 Aug 13	Unstressed log-phase growth (control)	Negative	Indirect	Microarray analysis - wt vs TF mutant
YKL112W	ABF1	YFR023W	PES4	16880382	2006 Aug 8	Carbon source quality/availability	Positive	Indirect	Microarray analysis (WT vs TF overexpression)
YKL112W	ABF1	YFR026C	ULI1	15192094	2004 Aug 13	Unstressed log-phase growth (control)	Negative	Indirect	Microarray analysis - wt vs TF mutant
YKL112W	ABF1	YFR031C-A	RPL2A	2183035	1990 May	Unstressed log-phase growth (control)	N/A	Direct	ChIP
YKL112W	ABF1	YFR031C-A	RPL2A	9677425	1998 Jul 31	Unstressed log-phase growth (control)	N/A	Direct	DNA footprinting
YKL112W	ABF1	YFR040W	SAP155	20385592	2010 Aug	Unstressed log-phase growth (control)	Positive	Indirect	Microarray analysis - wt vs TF mutant
YKL112W	ABF1	YFR044C	DUG1	15192094	2004 Aug 13	Unstressed log-phase growth (control)	Positive	Indirect	Northern Blotting - wt vs TF mutant
YKL112W	ABF1	YFR044C	DUG1	20385592	2010 Aug	Unstressed log-phase growth (control)	Positive	Indirect	Microarray analysis - wt vs TF mutant
YKL112W	ABF1	YFR046C	CNN1	20385592	2010 Aug	Unstressed log-phase growth (control)	Negative	Indirect	Microarray analysis - wt vs TF mutant
YKL112W	ABF1	YFR055W	IRC7	20385592	2010 Aug	Unstressed log-phase growth (control)	Positive	Indirect	Microarray analysis - wt vs TF mutant
YKL112W	ABF1	YGL001C	ERG26	20385592	2010 Aug	Unstressed log-phase growth (control)	Positive	Indirect	Microarray analysis - wt vs TF mutant
YKL112W	ABF1	YGL009C	LEU1	16880382	2006 Aug 8	Carbon source quality/availability	Positive	Indirect	Microarray analysis (WT vs TF overexpression)
YKL112W	ABF1	YGL009C	LEU1	20385592	2010 Aug	Unstressed log-phase growth (control)	Positive	Indirect	Microarray analysis - wt vs TF mutant
YKL112W	ABF1	YGL012W	ERG4	20385592	2010 Aug	Unstressed log-phase growth (control)	Positive	Indirect	Microarray analysis - wt vs TF mutant
YKL112W	ABF1	YGL032C	AGA2	20385592	2010 Aug	Unstressed log-phase growth (control)	Positive	Indirect	Microarray analysis - wt vs TF mutant
YKL112W	ABF1	YGL040C	HEM2	20385592	2010 Aug	Unstressed log-phase growth (control)	Positive	Indirect	Microarray analysis - wt vs TF mutant
YKL112W	ABF1	YGL051W	MST27	20385592	2010 Aug	Unstressed log-phase growth (control)	Positive	Indirect	Microarray analysis - wt vs TF mutant
YKL112W	ABF1	YGL052W	Uncharacterized	20385592	2010 Aug	Unstressed log-phase growth (control)	Positive	Indirect	Microarray analysis - wt vs TF mutant
YKL112W	ABF1	YGL053W	PRM8	20385592	2010 Aug	Unstressed log-phase growth (control)	Positive	Indirect	Microarray analysis - wt vs TF mutant
YKL112W	ABF1	YGL075C	MPS2	20385592	2010 Aug	Unstressed log-phase growth (control)	Positive	Indirect	Microarray analysis - wt vs TF mutant
YKL112W	ABF1	YGL077C	HNM1	15192094	2004 Aug 13	Unstressed log-phase growth (control)	Positive	Indirect	Microarray analysis - wt vs TF mutant
YKL112W	ABF1	YGL081W	YGL081W	20385592	2010 Aug	Unstressed log-phase growth (control)	Positive	Indirect	Microarray analysis - wt vs TF mutant
YKL112W	ABF1	YGL082W	YGL082W	20385592	2010 Aug	Unstressed log-phase growth (control)	Positive	Indirect	Microarray analysis - wt vs TF mutant
YKL112W	ABF1	YGL084C	GUP1	20385592	2010 Aug	Unstressed log-phase growth (control)	Positive	Indirect	Microarray analysis - wt vs TF mutant
YKL112W	ABF1	YGL085W	LCL3	20385592	2010 Aug	Unstressed log-phase growth (control)	Positive	Indirect	Microarray analysis - wt vs TF mutant
YKL112W	ABF1	YGL105W	ARC1	20385592	2010 Aug	Unstressed log-phase growth (control)	Positive	Indirect	Microarray analysis - wt vs TF mutant
YKL112W	ABF1	YGL106W	MLC1	15343339	2004 Sep 2	N/A	N/A	Direct	Chip-on-chip
YKL112W	ABF1	YGL106W	MLC1	20385592	2010 Aug	Unstressed log-phase growth (control)	Positive	Indirect	Microarray analysis - wt vs TF mutant
YKL112W	ABF1	YGL107C	RMD9	15343339	2004 Sep 2	N/A	N/A	Direct	Chip-on-chip
YKL112W	ABF1	YGL107C	RMD9	20385592	2010 Aug	Unstressed log-phase growth (control)	Positive	Indirect	Microarray analysis - wt vs TF mutant
YKL112W	ABF1	YGL109W	Uncharacterized	20385592	2010 Aug	Unstressed log-phase growth (control)	Positive	Indirect	Microarray analysis - wt vs TF mutant
YKL112W	ABF1	YGL114W	YGL114W	20385592	2010 Aug	Unstressed log-phase growth (control)	Positive	Indirect	Microarray analysis - wt vs TF mutant
YKL112W	ABF1	YGL116W	CDC20	20385592	2010 Aug	Unstressed log-phase growth (control)	Positive	Indirect	Microarray analysis - wt vs TF mutant
YKL112W	ABF1	YGL121C	GPG1	15192094	2004 Aug 13	Unstressed log-phase growth (control)	Negative	Indirect	Microarray analysis - wt vs TF mutant
YKL112W	ABF1	YGL121C	GPG1	20385592	2010 Aug	Unstressed log-phase growth (control)	Positive	Indirect	Microarray analysis - wt vs TF mutant
YKL112W	ABF1	YGL139W	FLC3	20385592	2010 Aug	Unstressed log-phase growth (control)	Positive	Indirect	Microarray analysis - wt vs TF mutant
YKL112W	ABF1	YGL143C	MRF1	20385592	2010 Aug	Unstressed log-phase growth (control)	Positive	Indirect	Microarray analysis - wt vs TF mutant
YKL112W	ABF1	YGL144C	ROG1	20385592	2010 Aug	Unstressed log-phase growth (control)	Positive	Indirect	Microarray analysis - wt vs TF mutant
YKL112W	ABF1	YGL146C	RRT6	20385592	2010 Aug	Unstressed log-phase growth (control)	Positive	Indirect	Microarray analysis - wt vs TF mutant
YKL112W	ABF1	YGL148W	ARO2	20385592	2010 Aug	Unstressed log-phase growth (control)	Positive	Indirect	Microarray analysis - wt vs TF mutant
YKL112W	ABF1	YGL156W	AMS1	15192094	2004 Aug 13	Unstressed log-phase growth (control)	Negative	Indirect	Microarray analysis - wt vs TF mutant
YKL112W	ABF1	YGL159W	YGL159W	20385592	2010 Aug	Unstressed log-phase growth (control)	Positive	Indirect	Microarray analysis - wt vs TF mutant
YKL112W	ABF1	YGL161C	YIP5	20385592	2010 Aug	Unstressed log-phase growth (control)	Positive	Indirect	Microarray analysis - wt vs TF mutant
YKL112W	ABF1	YGL181W	GTS1	20385592	2010 Aug	Unstressed log-phase growth (control)	Positive	Indirect	Microarray analysis - wt vs TF mutant
YKL112W	ABF1	YGL191W	COX13	20385592	2010 Aug	Unstressed log-phase growth (control)	Negative	Indirect	Microarray analysis - wt vs TF mutant
YKL112W	ABF1	YGL192W	IME4	15343339	2004 Sep 2	N/A	N/A	Direct	Chip-on-chip
YKL112W	ABF1	YGL192W	IME4	16709784	2006 May 19	N/A	N/A	Direct	Chip-on-chip
YKL112W	ABF1	YGL194C	HOS2	15343339	2004 Sep 2	N/A	N/A	Direct	Chip-on-chip
YKL112W	ABF1	YGL194C	HOS2	16709784	2006 May 19	N/A	N/A	Direct	Chip-on-chip
YKL112W	ABF1	YGL195W	GCN1	15343339	2004 Sep 2	N/A	N/A	Direct	Chip-on-chip
YKL112W	ABF1	YGL204C	YGL204C	20385592	2010 Aug	Unstressed log-phase growth (control)	Positive	Indirect	Microarray analysis - wt vs TF mutant
YKL112W	ABF1	YGL213C	SKI8	20385592	2010 Aug	Unstressed log-phase growth (control)	Positive	Indirect	Microarray analysis - wt vs TF mutant
YKL112W	ABF1	YGL219C	MDM34	20385592	2010 Aug	Unstressed log-phase growth (control)	Positive	Indirect	Microarray analysis - wt vs TF mutant
YKL112W	ABF1	YGL221C	NIF3	20385592	2010 Aug	Unstressed log-phase growth (control)	Positive	Indirect	Microarray analysis - wt vs TF mutant
YKL112W	ABF1	YGL222C	EDC1	15343339	2004 Sep 2	N/A	N/A	Direct	Chip-on-chip
YKL112W	ABF1	YGL222C	EDC1	16709784	2006 May 19	N/A	N/A	Direct	Chip-on-chip
YKL112W	ABF1	YGL225W	VRG4	20385592	2010 Aug	Unstressed log-phase growth (control)	Positive	Indirect	Microarray analysis - wt vs TF mutant
YKL112W	ABF1	YGL226C-A	OST5	20385592	2010 Aug	Unstressed log-phase growth (control)	Negative	Indirect	Microarray analysis - wt vs TF mutant
YKL112W	ABF1	YGL226W	MTC3	20385592	2010 Aug	Unstressed log-phase growth (control)	Positive	Indirect	Microarray analysis - wt vs TF mutant
YKL112W	ABF1	YGL228W	SHE10	15343339	2004 Sep 2	N/A	N/A	Direct	Chip-on-chip
YKL112W	ABF1	YGL229C	SAP4	15343339	2004 Sep 2	N/A	N/A	Direct	Chip-on-chip
YKL112W	ABF1	YGL234W	ADE5,7	9148957	1997 May 16	Unstressed log-phase growth (control)	N/A	Direct	EMSA
YKL112W	ABF1	YGL234W	ADE5,7	15456886	2004 Oct	N/A	N/A	Direct	alfa-gal - wt vs. target promoter mutant
YKL112W	ABF1	YGL244W	RTF1	20385592	2010 Aug	Unstressed log-phase growth (control)	Positive	Indirect	Microarray analysis - wt vs TF mutant
YKL112W	ABF1	YGL253W	HXK2	20385592	2010 Aug	Unstressed log-phase growth (control)	Positive	Indirect	Microarray analysis - wt vs TF mutant
YKL112W	ABF1	YGL256W	ADH4	16880382	2006 Aug 8	Carbon source quality/availability	Positive	Indirect	Microarray analysis (WT vs TF overexpression)
YKL112W	ABF1	YGL256W	ADH4	20385592	2010 Aug	Unstressed log-phase growth (control)	Positive	Indirect	Microarray analysis - wt vs TF mutant
YKL112W	ABF1	YGL258W	VEL1	20385592	2010 Aug	Unstressed log-phase growth (control)	Positive	Indirect	Microarray analysis - wt vs TF mutant
YKL112W	ABF1	YGR008C	STF2	20385592	2010 Aug	Unstressed log-phase growth (control)	Positive	Indirect	Microarray analysis - wt vs TF mutant
YKL112W	ABF1	YGR014W	MSB2	20385592	2010 Aug	Unstressed log-phase growth (control)	Positive	Indirect	Microarray analysis - wt vs TF mutant
YKL112W	ABF1	YGR019W	UGA1	20385592	2010 Aug	Unstressed log-phase growth (control)	Positive	Indirect	Microarray analysis - wt vs TF mutant
YKL112W	ABF1	YGR025W	YGR025W	20385592	2010 Aug	Unstressed log-phase growth (control)	Positive	Indirect	Microarray analysis - wt vs TF mutant
YKL112W	ABF1	YGR038C-B	YGR038C-B	20385592	2010 Aug	Unstressed log-phase growth (control)	Positive	Indirect	Microarray analysis - wt vs TF mutant
YKL112W	ABF1	YGR038W	ORM1	20385592	2010 Aug	Unstressed log-phase growth (control)	Positive	Indirect	Microarray analysis - wt vs TF mutant
YKL112W	ABF1	YGR039W	YGR039W	20385592	2010 Aug	Unstressed log-phase growth (control)	Positive	Indirect	Microarray analysis - wt vs TF mutant
YKL112W	ABF1	YGR042W	MTE1	20385592	2010 Aug	Unstressed log-phase growth (control)	Positive	Indirect	Microarray analysis - wt vs TF mutant
YKL112W	ABF1	YGR043C	NQM1	15192094	2004 Aug 13	Unstressed log-phase growth (control)	Negative	Indirect	Microarray analysis - wt vs TF mutant
YKL112W	ABF1	YGR049W	SCM4	20385592	2010 Aug	Unstressed log-phase growth (control)	Positive	Indirect	Microarray analysis - wt vs TF mutant
YKL112W	ABF1	YGR055W	MUP1	20385592	2010 Aug	Unstressed log-phase growth (control)	Positive	Indirect	Microarray analysis - wt vs TF mutant
YKL112W	ABF1	YGR056W	RSC1	15343339	2004 Sep 2	N/A	N/A	Direct	Chip-on-chip
YKL112W	ABF1	YGR059W	SPR3	7590307	1995 Oct 16	In vitro	N/A	Direct	EMSA
YKL112W	ABF1	YGR059W	SPR3	9032242	1997 Mar	Cell cycle/morphology	Positive	Indirect	lacZ - wt vs. Mutant promoter region
YKL112W	ABF1	YGR059W	SPR3	15343339	2004 Sep 2	N/A	N/A	Direct	Chip-on-chip
YKL112W	ABF1	YGR059W	SPR3	16709784	2006 May 19	N/A	N/A	Direct	Chip-on-chip
YKL112W	ABF1	YGR065C	VHT1	20385592	2010 Aug	Unstressed log-phase growth (control)	Positive	Indirect	Microarray analysis - wt vs TF mutant
YKL112W	ABF1	YGR067C	YGR067C	20385592	2010 Aug	Unstressed log-phase growth (control)	Negative	Indirect	Microarray analysis - wt vs TF mutant
YKL112W	ABF1	YGR074W	SMD1	20385592	2010 Aug	Unstressed log-phase growth (control)	Positive	Indirect	Microarray analysis - wt vs TF mutant
YKL112W	ABF1	YGR082W	TOM20	20385592	2010 Aug	Unstressed log-phase growth (control)	Positive	Indirect	Microarray analysis - wt vs TF mutant
YKL112W	ABF1	YGR109W-A	YGR109W-A	20385592	2010 Aug	Unstressed log-phase growth (control)	Positive	Indirect	Microarray analysis - wt vs TF mutant
YKL112W	ABF1	YGR109W-B	YGR109W-B	20385592	2010 Aug	Unstressed log-phase growth (control)	Negative	Indirect	Microarray analysis - wt vs TF mutant
YKL112W	ABF1	YGR119C	NUP57	15343339	2004 Sep 2	N/A	N/A	Direct	Chip-on-chip
YKL112W	ABF1	YGR119C	NUP57	16709784	2006 May 19	N/A	N/A	Direct	Chip-on-chip
YKL112W	ABF1	YGR119C	NUP57	20385592	2010 Aug	Unstressed log-phase growth (control)	Negative	Indirect	Microarray analysis - wt vs TF mutant
YKL112W	ABF1	YGR122C-A	Uncharacterized	20385592	2010 Aug	Unstressed log-phase growth (control)	Positive	Indirect	Microarray analysis - wt vs TF mutant
YKL112W	ABF1	YGR128C	UTP8	15343339	2004 Sep 2	N/A	N/A	Direct	Chip-on-chip
YKL112W	ABF1	YGR128C	UTP8	16709784	2006 May 19	N/A	N/A	Direct	Chip-on-chip
YKL112W	ABF1	YGR129W	SYF2	15343339	2004 Sep 2	N/A	N/A	Direct	Chip-on-chip
YKL112W	ABF1	YGR129W	SYF2	16709784	2006 May 19	N/A	N/A	Direct	Chip-on-chip
YKL112W	ABF1	YGR145W	ENP2	16880382	2006 Aug 8	Carbon source quality/availability	Negative	Indirect	Microarray analysis (WT vs TF overexpression)
YKL112W	ABF1	YGR145W	ENP2	20385592	2010 Aug	Unstressed log-phase growth (control)	Negative	Indirect	Microarray analysis - wt vs TF mutant
YKL112W	ABF1	YGR149W	GPC1	20385592	2010 Aug	Unstressed log-phase growth (control)	Positive	Indirect	Microarray analysis - wt vs TF mutant
YKL112W	ABF1	YGR151C	Uncharacterized	20385592	2010 Aug	Unstressed log-phase growth (control)	Negative	Indirect	Microarray analysis - wt vs TF mutant
YKL112W	ABF1	YGR157W	CHO2	20385592	2010 Aug	Unstressed log-phase growth (control)	Positive	Indirect	Microarray analysis - wt vs TF mutant
YKL112W	ABF1	YGR161C-D	YGR161C-D	20385592	2010 Aug	Unstressed log-phase growth (control)	Positive	Indirect	Microarray analysis - wt vs TF mutant
YKL112W	ABF1	YGR161W-B	YGR161W-B	20385592	2010 Aug	Unstressed log-phase growth (control)	Positive	Indirect	Microarray analysis - wt vs TF mutant
YKL112W	ABF1	YGR172C	YIP1	20385592	2010 Aug	Unstressed log-phase growth (control)	Positive	Indirect	Microarray analysis - wt vs TF mutant
YKL112W	ABF1	YGR181W	TIM13	20385592	2010 Aug	Unstressed log-phase growth (control)	Positive	Indirect	Microarray analysis - wt vs TF mutant
YKL112W	ABF1	YGR183C	QCR9	15343339	2004 Sep 2	N/A	N/A	Direct	Chip-on-chip
YKL112W	ABF1	YGR183C	QCR9	16709784	2006 May 19	N/A	N/A	Direct	Chip-on-chip
YKL112W	ABF1	YGR185C	TYS1	15343339	2004 Sep 2	N/A	N/A	Direct	Chip-on-chip
YKL112W	ABF1	YGR185C	TYS1	16709784	2006 May 19	N/A	N/A	Direct	Chip-on-chip
YKL112W	ABF1	YGR185C	TYS1	20385592	2010 Aug	Unstressed log-phase growth (control)	Positive	Indirect	Microarray analysis - wt vs TF mutant
YKL112W	ABF1	YGR186W	TFG1	15343339	2004 Sep 2	N/A	N/A	Direct	Chip-on-chip
YKL112W	ABF1	YGR186W	TFG1	16709784	2006 May 19	N/A	N/A	Direct	Chip-on-chip
YKL112W	ABF1	YGR192C	TDH3	7614553	1995 Mar	Unstressed log-phase growth (control)	Positive	Indirect	lacZ - wt vs. Mutant promoter region
YKL112W	ABF1	YGR192C	TDH3	20385592	2010 Aug	Unstressed log-phase growth (control)	Positive	Indirect	Microarray analysis - wt vs TF mutant
YKL112W	ABF1	YGR195W	SKI6	20385592	2010 Aug	Unstressed log-phase growth (control)	Positive	Indirect	Microarray analysis - wt vs TF mutant
YKL112W	ABF1	YGR203W	YCH1	20385592	2010 Aug	Unstressed log-phase growth (control)	Positive	Indirect	Microarray analysis - wt vs TF mutant
YKL112W	ABF1	YGR204W	ADE3	16709784	2006 May 19	N/A	N/A	Direct	Chip-on-chip
YKL112W	ABF1	YGR206W	MVB12	20385592	2010 Aug	Unstressed log-phase growth (control)	Positive	Indirect	Microarray analysis - wt vs TF mutant
YKL112W	ABF1	YGR208W	SER2	20385592	2010 Aug	Unstressed log-phase growth (control)	Positive	Indirect	Microarray analysis - wt vs TF mutant
YKL112W	ABF1	YGR211W	ZPR1	16880382	2006 Aug 8	Carbon source quality/availability	Positive	Indirect	Microarray analysis (WT vs TF overexpression)
YKL112W	ABF1	YGR211W	ZPR1	20385592	2010 Aug	Unstressed log-phase growth (control)	Positive	Indirect	Microarray analysis - wt vs TF mutant
YKL112W	ABF1	YGR215W	RSM27	15192094	2004 Aug 13	Unstressed log-phase growth (control)	Positive	Indirect	Microarray analysis - wt vs TF mutant
YKL112W	ABF1	YGR215W	RSM27	17158163	2007	Stress	Positive	Indirect	Microarray analysis (WT vs TF mutant)
YKL112W	ABF1	YGR219W	Uncharacterized	20385592	2010 Aug	Unstressed log-phase growth (control)	Positive	Indirect	Microarray analysis - wt vs TF mutant
YKL112W	ABF1	YGR220C	MRPL9	20385592	2010 Aug	Unstressed log-phase growth (control)	Positive	Indirect	Microarray analysis - wt vs TF mutant
YKL112W	ABF1	YGR223C	HSV2	20385592	2010 Aug	Unstressed log-phase growth (control)	Positive	Indirect	Microarray analysis - wt vs TF mutant
YKL112W	ABF1	YGR227W	DIE2	20385592	2010 Aug	Unstressed log-phase growth (control)	Positive	Indirect	Microarray analysis - wt vs TF mutant
YKL112W	ABF1	YGR231C	PHB2	15343339	2004 Sep 2	N/A	N/A	Direct	Chip-on-chip
YKL112W	ABF1	YGR231C	PHB2	16709784	2006 May 19	N/A	N/A	Direct	Chip-on-chip
YKL112W	ABF1	YGR232W	NAS6	15343339	2004 Sep 2	N/A	N/A	Direct	Chip-on-chip
YKL112W	ABF1	YGR232W	NAS6	16709784	2006 May 19	N/A	N/A	Direct	Chip-on-chip
YKL112W	ABF1	YGR232W	NAS6	17158163	2007	Stress	Negative	Indirect	Microarray analysis (WT vs TF mutant)
YKL112W	ABF1	YGR235C	MIC26	20385592	2010 Aug	Unstressed log-phase growth (control)	Positive	Indirect	Microarray analysis - wt vs TF mutant
YKL112W	ABF1	YGR238C	KEL2	20385592	2010 Aug	Unstressed log-phase growth (control)	Positive	Indirect	Microarray analysis - wt vs TF mutant
YKL112W	ABF1	YGR243W	MPC3	20385592	2010 Aug	Unstressed log-phase growth (control)	Positive	Indirect	Microarray analysis - wt vs TF mutant
YKL112W	ABF1	YGR249W	MGA1	15192094	2004 Aug 13	Unstressed log-phase growth (control)	Positive	Indirect	Microarray analysis - wt vs TF mutant
YKL112W	ABF1	YGR253C	PUP2	15343339	2004 Sep 2	N/A	N/A	Direct	Chip-on-chip
YKL112W	ABF1	YGR257C	MTM1	20385592	2010 Aug	Unstressed log-phase growth (control)	Positive	Indirect	Microarray analysis - wt vs TF mutant
YKL112W	ABF1	YGR259C	Uncharacterized	20385592	2010 Aug	Unstressed log-phase growth (control)	Positive	Indirect	Microarray analysis - wt vs TF mutant
YKL112W	ABF1	YGR260W	TNA1	20385592	2010 Aug	Unstressed log-phase growth (control)	Positive	Indirect	Microarray analysis - wt vs TF mutant
YKL112W	ABF1	YGR264C	MES1	28158860	2017 May 5	Unstressed log-phase growth (control)	N/A	Direct	ChIP-seq
YKL112W	ABF1	YGR268C	HUA1	15343339	2004 Sep 2	N/A	N/A	Direct	Chip-on-chip
YKL112W	ABF1	YGR268C	HUA1	16709784	2006 May 19	N/A	N/A	Direct	Chip-on-chip
YKL112W	ABF1	YGR268C	HUA1	20385592	2010 Aug	Unstressed log-phase growth (control)	Positive	Indirect	Microarray analysis - wt vs TF mutant
YKL112W	ABF1	YGR270W	YTA7	15343339	2004 Sep 2	N/A	N/A	Direct	Chip-on-chip
YKL112W	ABF1	YGR270W	YTA7	16709784	2006 May 19	N/A	N/A	Direct	Chip-on-chip
YKL112W	ABF1	YGR270W	YTA7	20385592	2010 Aug	Unstressed log-phase growth (control)	Positive	Indirect	Microarray analysis - wt vs TF mutant
YKL112W	ABF1	YGR277C	CAB4	20385592	2010 Aug	Unstressed log-phase growth (control)	Positive	Indirect	Microarray analysis - wt vs TF mutant
YKL112W	ABF1	YGR279C	SCW4	20385592	2010 Aug	Unstressed log-phase growth (control)	Positive	Indirect	Microarray analysis - wt vs TF mutant
YKL112W	ABF1	YGR280C	PXR1	20385592	2010 Aug	Unstressed log-phase growth (control)	Negative	Indirect	Microarray analysis - wt vs TF mutant
YKL112W	ABF1	YGR282C	BGL2	16709784	2006 May 19	N/A	N/A	Direct	Chip-on-chip
YKL112W	ABF1	YGR282C	BGL2	20385592	2010 Aug	Unstressed log-phase growth (control)	Positive	Indirect	Microarray analysis - wt vs TF mutant
YKL112W	ABF1	YGR290W	Uncharacterized	20385592	2010 Aug	Unstressed log-phase growth (control)	Positive	Indirect	Microarray analysis - wt vs TF mutant
YKL112W	ABF1	YGR295C	COS6	20385592	2010 Aug	Unstressed log-phase growth (control)	Positive	Indirect	Microarray analysis - wt vs TF mutant
YKL112W	ABF1	YHL021C	AIM17	20385592	2010 Aug	Unstressed log-phase growth (control)	Positive	Indirect	Microarray analysis - wt vs TF mutant
YKL112W	ABF1	YHL027W	RIM101	15343339	2004 Sep 2	N/A	N/A	Direct	Chip-on-chip
YKL112W	ABF1	YHL028W	WSC4	15343339	2004 Sep 2	N/A	N/A	Direct	Chip-on-chip
YKL112W	ABF1	YHL029C	OCA5	15343339	2004 Sep 2	N/A	N/A	Direct	Chip-on-chip
YKL112W	ABF1	YHL036W	MUP3	20385592	2010 Aug	Unstressed log-phase growth (control)	Positive	Indirect	Microarray analysis - wt vs TF mutant
YKL112W	ABF1	YHL041W	YHL041W	20385592	2010 Aug	Unstressed log-phase growth (control)	Positive	Indirect	Microarray analysis - wt vs TF mutant
YKL112W	ABF1	YHL044W	YHL044W	20385592	2010 Aug	Unstressed log-phase growth (control)	Positive	Indirect	Microarray analysis - wt vs TF mutant
YKL112W	ABF1	YHL045W	Uncharacterized	20385592	2010 Aug	Unstressed log-phase growth (control)	Positive	Indirect	Microarray analysis - wt vs TF mutant
YKL112W	ABF1	YHL047C	ARN2	15192094	2004 Aug 13	Unstressed log-phase growth (control)	Negative	Indirect	Microarray analysis - wt vs TF mutant
YKL112W	ABF1	YHR001W-A	QCR10	20385592	2010 Aug	Unstressed log-phase growth (control)	Positive	Indirect	Microarray analysis - wt vs TF mutant
YKL112W	ABF1	YHR002W	LEU5	20385592	2010 Aug	Unstressed log-phase growth (control)	Positive	Indirect	Microarray analysis - wt vs TF mutant
YKL112W	ABF1	YHR010W	RPL27A	20385592	2010 Aug	Unstressed log-phase growth (control)	Negative	Indirect	Microarray analysis - wt vs TF mutant
YKL112W	ABF1	YHR015W	MIP6	16880382	2006 Aug 8	Carbon source quality/availability	Positive	Indirect	Microarray analysis (WT vs TF overexpression)
YKL112W	ABF1	YHR015W	MIP6	20385592	2010 Aug	Unstressed log-phase growth (control)	Positive	Indirect	Microarray analysis - wt vs TF mutant
YKL112W	ABF1	YHR016C	YSC84	20385592	2010 Aug	Unstressed log-phase growth (control)	Positive	Indirect	Microarray analysis - wt vs TF mutant
YKL112W	ABF1	YHR021C	RPS27B	20385592	2010 Aug	Unstressed log-phase growth (control)	Positive	Indirect	Microarray analysis - wt vs TF mutant
YKL112W	ABF1	YHR025W	THR1	20385592	2010 Aug	Unstressed log-phase growth (control)	Positive	Indirect	Microarray analysis - wt vs TF mutant
YKL112W	ABF1	YHR026W	VMA16	20385592	2010 Aug	Unstressed log-phase growth (control)	Positive	Indirect	Microarray analysis - wt vs TF mutant
YKL112W	ABF1	YHR029C	YHI9	20385592	2010 Aug	Unstressed log-phase growth (control)	Positive	Indirect	Microarray analysis - wt vs TF mutant
YKL112W	ABF1	YHR030C	SLT2	20385592	2010 Aug	Unstressed log-phase growth (control)	Positive	Indirect	Microarray analysis - wt vs TF mutant
YKL112W	ABF1	YHR032W	ERC1	20385592	2010 Aug	Unstressed log-phase growth (control)	Positive	Indirect	Microarray analysis - wt vs TF mutant
YKL112W	ABF1	YHR043C	DOG2	20385592	2010 Aug	Unstressed log-phase growth (control)	Positive	Indirect	Microarray analysis - wt vs TF mutant
YKL112W	ABF1	YHR046C	INM1	20385592	2010 Aug	Unstressed log-phase growth (control)	Positive	Indirect	Microarray analysis - wt vs TF mutant
YKL112W	ABF1	YHR047C	AAP1	20385592	2010 Aug	Unstressed log-phase growth (control)	Positive	Indirect	Microarray analysis - wt vs TF mutant
YKL112W	ABF1	YHR050W	SMF2	20385592	2010 Aug	Unstressed log-phase growth (control)	Positive	Indirect	Microarray analysis - wt vs TF mutant
YKL112W	ABF1	YHR050W-A	YHR050W-A	16709784	2006 May 19	N/A	N/A	Direct	Chip-on-chip
YKL112W	ABF1	YHR051W	COX6	1314953	1992 May	Stress	Positive	Indirect	lacZ - wt vs. Mutant promoter region
YKL112W	ABF1	YHR051W	COX6	1324416	1992 Sep	N/A	N/A
YKL112W	ABF1	YHR051W	COX6	15343339	2004 Sep 2	N/A	N/A	Direct	Chip-on-chip
YKL112W	ABF1	YHR051W	COX6	16709784	2006 May 19	N/A	N/A	Direct	Chip-on-chip
YKL112W	ABF1	YHR051W	COX6	18977319	2009 Feb	Unstressed log-phase growth (control)	Positive	Indirect	lacZ - wt vs. Mutant promoter region
YKL112W	ABF1	YHR052W	CIC1	28158860	2017 May 5	Unstressed log-phase growth (control)	N/A	Direct	ChIP-seq
YKL112W	ABF1	YHR064C	SSZ1	15343339	2004 Sep 2	N/A	N/A	Direct	Chip-on-chip
YKL112W	ABF1	YHR064C	SSZ1	16709784	2006 May 19	N/A	N/A	Direct	Chip-on-chip
YKL112W	ABF1	YHR065C	RRP3	28158860	2017 May 5	Unstressed log-phase growth (control)	N/A	Direct	ChIP-seq
YKL112W	ABF1	YHR074W	QNS1	15192094	2004 Aug 13	Unstressed log-phase growth (control)	Positive	Indirect	Microarray analysis - wt vs TF mutant
YKL112W	ABF1	YHR074W	QNS1	20385592	2010 Aug	Unstressed log-phase growth (control)	Positive	Indirect	Microarray analysis - wt vs TF mutant
YKL112W	ABF1	YHR075C	PPE1	16880382	2006 Aug 8	Carbon source quality/availability	Negative	Indirect	Microarray analysis (WT vs TF overexpression)
YKL112W	ABF1	YHR075C	PPE1	20385592	2010 Aug	Unstressed log-phase growth (control)	Positive	Indirect	Microarray analysis - wt vs TF mutant
YKL112W	ABF1	YHR077C	NMD2	15343339	2004 Sep 2	N/A	N/A	Direct	Chip-on-chip
YKL112W	ABF1	YHR077C	NMD2	16709784	2006 May 19	N/A	N/A	Direct	Chip-on-chip
YKL112W	ABF1	YHR078W	YHR078W	15343339	2004 Sep 2	N/A	N/A	Direct	Chip-on-chip
YKL112W	ABF1	YHR078W	YHR078W	16709784	2006 May 19	N/A	N/A	Direct	Chip-on-chip
YKL112W	ABF1	YHR084W	STE12	20385592	2010 Aug	Unstressed log-phase growth (control)	Positive	Indirect	Microarray analysis - wt vs TF mutant
YKL112W	ABF1	YHR090C	YNG2	15343339	2004 Sep 2	N/A	N/A	Direct	Chip-on-chip
YKL112W	ABF1	YHR090C	YNG2	16709784	2006 May 19	N/A	N/A	Direct	Chip-on-chip
YKL112W	ABF1	YHR092C	HXT4	20385592	2010 Aug	Unstressed log-phase growth (control)	Positive	Indirect	Microarray analysis - wt vs TF mutant
YKL112W	ABF1	YHR100C	GEP4	20385592	2010 Aug	Unstressed log-phase growth (control)	Positive	Indirect	Microarray analysis - wt vs TF mutant
YKL112W	ABF1	YHR104W	GRE3	16880382	2006 Aug 8	Carbon source quality/availability	Positive	Indirect	Microarray analysis (WT vs TF overexpression)
YKL112W	ABF1	YHR104W	GRE3	20385592	2010 Aug	Unstressed log-phase growth (control)	Positive	Indirect	Microarray analysis - wt vs TF mutant
YKL112W	ABF1	YHR105W	YPT35	20385592	2010 Aug	Unstressed log-phase growth (control)	Positive	Indirect	Microarray analysis - wt vs TF mutant
YKL112W	ABF1	YHR108W	GGA2	20385592	2010 Aug	Unstressed log-phase growth (control)	Positive	Indirect	Microarray analysis - wt vs TF mutant
YKL112W	ABF1	YHR109W	CTM1	20385592	2010 Aug	Unstressed log-phase growth (control)	Positive	Indirect	Microarray analysis - wt vs TF mutant
YKL112W	ABF1	YHR115C	DMA1	15343339	2004 Sep 2	N/A	N/A	Direct	Chip-on-chip
YKL112W	ABF1	YHR116W	COX23	15343339	2004 Sep 2	N/A	N/A	Direct	Chip-on-chip
YKL112W	ABF1	YHR119W	SET1	20385592	2010 Aug	Unstressed log-phase growth (control)	Negative	Indirect	Microarray analysis - wt vs TF mutant
YKL112W	ABF1	YHR123W	EPT1	20385592	2010 Aug	Unstressed log-phase growth (control)	Positive	Indirect	Microarray analysis - wt vs TF mutant
YKL112W	ABF1	YHR138C	YHR138C	20385592	2010 Aug	Unstressed log-phase growth (control)	Positive	Indirect	Microarray analysis - wt vs TF mutant
YKL112W	ABF1	YHR142W	CHS7	20385592	2010 Aug	Unstressed log-phase growth (control)	Positive	Indirect	Microarray analysis - wt vs TF mutant
YKL112W	ABF1	YHR143W	DSE2	20385592	2010 Aug	Unstressed log-phase growth (control)	Positive	Indirect	Microarray analysis - wt vs TF mutant
YKL112W	ABF1	YHR145C	Uncharacterized	20385592	2010 Aug	Unstressed log-phase growth (control)	Positive	Indirect	Microarray analysis - wt vs TF mutant
YKL112W	ABF1	YHR148W	IMP3	20385592	2010 Aug	Unstressed log-phase growth (control)	Negative	Indirect	Microarray analysis - wt vs TF mutant
YKL112W	ABF1	YHR157W	REC104	20385592	2010 Aug	Unstressed log-phase growth (control)	Positive	Indirect	Microarray analysis - wt vs TF mutant
YKL112W	ABF1	YHR161C	YAP1801	15343339	2004 Sep 2	N/A	N/A	Direct	Chip-on-chip
YKL112W	ABF1	YHR162W	MPC2	15343339	2004 Sep 2	N/A	N/A	Direct	Chip-on-chip
YKL112W	ABF1	YHR165C	PRP8	16709784	2006 May 19	N/A	N/A	Direct	Chip-on-chip
YKL112W	ABF1	YHR173C	YHR173C	20385592	2010 Aug	Unstressed log-phase growth (control)	Positive	Indirect	Microarray analysis - wt vs TF mutant
YKL112W	ABF1	YHR174W	ENO2	8455635	1993 Apr	In vitro	N/A	Direct	EMSA
YKL112W	ABF1	YHR179W	OYE2	20385592	2010 Aug	Unstressed log-phase growth (control)	Positive	Indirect	Microarray analysis - wt vs TF mutant
YKL112W	ABF1	YHR196W	UTP9	20385592	2010 Aug	Unstressed log-phase growth (control)	Negative	Indirect	Microarray analysis - wt vs TF mutant
YKL112W	ABF1	YHR197W	RIX1	20385592	2010 Aug	Unstressed log-phase growth (control)	Negative	Indirect	Microarray analysis - wt vs TF mutant
YKL112W	ABF1	YHR199C	AIM46	15343339	2004 Sep 2	N/A	N/A	Direct	Chip-on-chip
YKL112W	ABF1	YHR200W	RPN10	15343339	2004 Sep 2	N/A	N/A	Direct	Chip-on-chip
YKL112W	ABF1	YHR208W	BAT1	20385592	2010 Aug	Unstressed log-phase growth (control)	Positive	Indirect	Microarray analysis - wt vs TF mutant
YKL112W	ABF1	YHR209W	CRG1	20385592	2010 Aug	Unstressed log-phase growth (control)	Positive	Indirect	Microarray analysis - wt vs TF mutant
YKL112W	ABF1	YHR215W	PHO12	20385592	2010 Aug	Unstressed log-phase growth (control)	Positive	Indirect	Microarray analysis - wt vs TF mutant
YKL112W	ABF1	YHR216W	IMD2	15192094	2004 Aug 13	Unstressed log-phase growth (control)	Negative	Indirect	Microarray analysis - wt vs TF mutant
YKL112W	ABF1	YIL003W	CFD1	15192094	2004 Aug 13	Unstressed log-phase growth (control)	Positive	Indirect	Microarray analysis - wt vs TF mutant
YKL112W	ABF1	YIL003W	CFD1	17158163	2007	Stress	Positive	Indirect	Microarray analysis (WT vs TF mutant)
YKL112W	ABF1	YIL009C-A	EST3	16880382	2006 Aug 8	Carbon source quality/availability	Negative	Indirect	Microarray analysis (WT vs TF overexpression)
YKL112W	ABF1	YIL009C-A	EST3	20385592	2010 Aug	Unstressed log-phase growth (control)	Positive	Indirect	Microarray analysis - wt vs TF mutant
YKL112W	ABF1	YIL010W	DOT5	20385592	2010 Aug	Unstressed log-phase growth (control)	Positive	Indirect	Microarray analysis - wt vs TF mutant
YKL112W	ABF1	YIL011W	TIR3	20385592	2010 Aug	Unstressed log-phase growth (control)	Positive	Indirect	Microarray analysis - wt vs TF mutant
YKL112W	ABF1	YIL015W	BAR1	20385592	2010 Aug	Unstressed log-phase growth (control)	Positive	Indirect	Microarray analysis - wt vs TF mutant
YKL112W	ABF1	YIL018W	RPL2B	2183035	1990 May	Unstressed log-phase growth (control)	N/A	Direct	ChIP
YKL112W	ABF1	YIL018W	RPL2B	9677425	1998 Jul 31	Unstressed log-phase growth (control)	N/A	Direct	DNA footprinting
YKL112W	ABF1	YIL018W	RPL2B	20385592	2010 Aug	Unstressed log-phase growth (control)	Positive	Indirect	Microarray analysis - wt vs TF mutant
YKL112W	ABF1	YIL020C	HIS6	20385592	2010 Aug	Unstressed log-phase growth (control)	Positive	Indirect	Microarray analysis - wt vs TF mutant
YKL112W	ABF1	YIL023C	YKE4	20385592	2010 Aug	Unstressed log-phase growth (control)	Positive	Indirect	Microarray analysis - wt vs TF mutant
YKL112W	ABF1	YIL031W	ULP2	15343339	2004 Sep 2	N/A	N/A	Direct	Chip-on-chip
YKL112W	ABF1	YIL032C	Uncharacterized	15343339	2004 Sep 2	N/A	N/A	Direct	Chip-on-chip
YKL112W	ABF1	YIL033C	BCY1	20385592	2010 Aug	Unstressed log-phase growth (control)	Positive	Indirect	Microarray analysis - wt vs TF mutant
YKL112W	ABF1	YIL036W	CST6	15343339	2004 Sep 2	N/A	N/A	Direct	Chip-on-chip
YKL112W	ABF1	YIL036W	CST6	16709784	2006 May 19	N/A	N/A	Direct	Chip-on-chip
YKL112W	ABF1	YIL037C	PRM2	15343339	2004 Sep 2	N/A	N/A	Direct	Chip-on-chip
YKL112W	ABF1	YIL037C	PRM2	16709784	2006 May 19	N/A	N/A	Direct	Chip-on-chip
YKL112W	ABF1	YIL037C	PRM2	16880382	2006 Aug 8	Carbon source quality/availability	Positive	Indirect	Microarray analysis (WT vs TF overexpression)
YKL112W	ABF1	YIL041W	GVP36	20385592	2010 Aug	Unstressed log-phase growth (control)	Positive	Indirect	Microarray analysis - wt vs TF mutant
YKL112W	ABF1	YIL043C	CBR1	20385592	2010 Aug	Unstressed log-phase growth (control)	Positive	Indirect	Microarray analysis - wt vs TF mutant
YKL112W	ABF1	YIL048W	NEO1	15343339	2004 Sep 2	N/A	N/A	Direct	Chip-on-chip
YKL112W	ABF1	YIL048W	NEO1	20385592	2010 Aug	Unstressed log-phase growth (control)	Positive	Indirect	Microarray analysis - wt vs TF mutant
YKL112W	ABF1	YIL049W	DFG10	20385592	2010 Aug	Unstressed log-phase growth (control)	Positive	Indirect	Microarray analysis - wt vs TF mutant
YKL112W	ABF1	YIL050W	PCL7	20385592	2010 Aug	Unstressed log-phase growth (control)	Positive	Indirect	Microarray analysis - wt vs TF mutant
YKL112W	ABF1	YIL051C	MMF1	20385592	2010 Aug	Unstressed log-phase growth (control)	Positive	Indirect	Microarray analysis - wt vs TF mutant
YKL112W	ABF1	YIL053W	GPP1	16880382	2006 Aug 8	Carbon source quality/availability	Positive	Indirect	Microarray analysis (WT vs TF overexpression)
YKL112W	ABF1	YIL053W	GPP1	20385592	2010 Aug	Unstressed log-phase growth (control)	Positive	Indirect	Microarray analysis - wt vs TF mutant
YKL112W	ABF1	YIL056W	VHR1	20385592	2010 Aug	Unstressed log-phase growth (control)	Positive	Indirect	Microarray analysis - wt vs TF mutant
YKL112W	ABF1	YIL059C	Uncharacterized	20385592	2010 Aug	Unstressed log-phase growth (control)	Positive	Indirect	Microarray analysis - wt vs TF mutant
YKL112W	ABF1	YIL060W	YIL060W	20385592	2010 Aug	Unstressed log-phase growth (control)	Positive	Indirect	Microarray analysis - wt vs TF mutant
YKL112W	ABF1	YIL070C	MAM33	20385592	2010 Aug	Unstressed log-phase growth (control)	Positive	Indirect	Microarray analysis - wt vs TF mutant
YKL112W	ABF1	YIL072W	HOP1	8649386	1996 Jun	Cell cycle/morphology	Positive	Indirect	lacZ - wt vs. TF mutant
YKL112W	ABF1	YIL072W	HOP1	9742114	1998 Oct	In vitro	N/A	Direct	EMSA
YKL112W	ABF1	YIL072W	HOP1	12799429	2003 Jun 15	In vitro	N/A	Direct	DNA footprinting
YKL112W	ABF1	YIL072W	HOP1	16880382	2006 Aug 8	Carbon source quality/availability	Positive	Indirect	Microarray analysis (WT vs TF overexpression)
YKL112W	ABF1	YIL085C	KTR7	20385592	2010 Aug	Unstressed log-phase growth (control)	Positive	Indirect	Microarray analysis - wt vs TF mutant
YKL112W	ABF1	YIL087C	AIM19	20385592	2010 Aug	Unstressed log-phase growth (control)	Positive	Indirect	Microarray analysis - wt vs TF mutant
YKL112W	ABF1	YIL088C	AVT7	20385592	2010 Aug	Unstressed log-phase growth (control)	Positive	Indirect	Microarray analysis - wt vs TF mutant
YKL112W	ABF1	YIL091C	UTP25	20385592	2010 Aug	Unstressed log-phase growth (control)	Negative	Indirect	Microarray analysis - wt vs TF mutant
YKL112W	ABF1	YIL091C	UTP25	28158860	2017 May 5	Unstressed log-phase growth (control)	N/A	Direct	ChIP-seq
YKL112W	ABF1	YIL106W	MOB1	26082499	2015 Sep 3	N/A	N/A	Direct	ChIP
YKL112W	ABF1	YIL107C	PFK26	26082499	2015 Sep 3	N/A	N/A	Direct	ChIP
YKL112W	ABF1	YIL116W	HIS5	20385592	2010 Aug	Unstressed log-phase growth (control)	Positive	Indirect	Microarray analysis - wt vs TF mutant
YKL112W	ABF1	YIL117C	PRM5	16880382	2006 Aug 8	Carbon source quality/availability	Positive	Indirect	Microarray analysis (WT vs TF overexpression)
YKL112W	ABF1	YIL117C	PRM5	20385592	2010 Aug	Unstressed log-phase growth (control)	Positive	Indirect	Microarray analysis - wt vs TF mutant
YKL112W	ABF1	YIL119C	RPI1	20385592	2010 Aug	Unstressed log-phase growth (control)	Positive	Indirect	Microarray analysis - wt vs TF mutant
YKL112W	ABF1	YIL120W	QDR1	20385592	2010 Aug	Unstressed log-phase growth (control)	Positive	Indirect	Microarray analysis - wt vs TF mutant
YKL112W	ABF1	YIL135C	VHS2	15343339	2004 Sep 2	N/A	N/A	Direct	Chip-on-chip
YKL112W	ABF1	YIL136W	OM45	20385592	2010 Aug	Unstressed log-phase growth (control)	Positive	Indirect	Microarray analysis - wt vs TF mutant
YKL112W	ABF1	YIL138C	TPM2	15343339	2004 Sep 2	N/A	N/A	Direct	Chip-on-chip
YKL112W	ABF1	YIL138C	TPM2	16709784	2006 May 19	N/A	N/A	Direct	Chip-on-chip
YKL112W	ABF1	YIL143C	SSL2	20385592	2010 Aug	Unstressed log-phase growth (control)	Negative	Indirect	Microarray analysis - wt vs TF mutant
YKL112W	ABF1	YIL147C	SLN1	20385592	2010 Aug	Unstressed log-phase growth (control)	Negative	Indirect	Microarray analysis - wt vs TF mutant
YKL112W	ABF1	YIL152W	YIL152W	16880382	2006 Aug 8	Carbon source quality/availability	Positive	Indirect	Microarray analysis (WT vs TF overexpression)
YKL112W	ABF1	YIL152W	YIL152W	20385592	2010 Aug	Unstressed log-phase growth (control)	Positive	Indirect	Microarray analysis - wt vs TF mutant
YKL112W	ABF1	YIL155C	GUT2	15192094	2004 Aug 13	Unstressed log-phase growth (control)	Negative	Indirect	Microarray analysis - wt vs TF mutant
YKL112W	ABF1	YIL157C	COA1	20385592	2010 Aug	Unstressed log-phase growth (control)	Positive	Indirect	Microarray analysis - wt vs TF mutant
YKL112W	ABF1	YIL162W	SUC2	20385592	2010 Aug	Unstressed log-phase growth (control)	Positive	Indirect	Microarray analysis - wt vs TF mutant
YKL112W	ABF1	YIL172C	IMA3	20385592	2010 Aug	Unstressed log-phase growth (control)	Positive	Indirect	Microarray analysis - wt vs TF mutant
YKL112W	ABF1	YIR002C	MPH1	20385592	2010 Aug	Unstressed log-phase growth (control)	Positive	Indirect	Microarray analysis - wt vs TF mutant
YKL112W	ABF1	YIR004W	DJP1	20385592	2010 Aug	Unstressed log-phase growth (control)	Negative	Indirect	Microarray analysis - wt vs TF mutant
YKL112W	ABF1	YIR010W	DSN1	15343339	2004 Sep 2	N/A	N/A	Direct	Chip-on-chip
YKL112W	ABF1	YIR022W	SEC11	20385592	2010 Aug	Unstressed log-phase growth (control)	Positive	Indirect	Microarray analysis - wt vs TF mutant
YKL112W	ABF1	YIR023W	DAL81	15343339	2004 Sep 2	N/A	N/A	Direct	Chip-on-chip
YKL112W	ABF1	YIR023W	DAL81	16709784	2006 May 19	N/A	N/A	Direct	Chip-on-chip
YKL112W	ABF1	YIR025W	MND2	20385592	2010 Aug	Unstressed log-phase growth (control)	Positive	Indirect	Microarray analysis - wt vs TF mutant
YKL112W	ABF1	YIR028W	DAL4	20385592	2010 Aug	Unstressed log-phase growth (control)	Positive	Indirect	Microarray analysis - wt vs TF mutant
YKL112W	ABF1	YIR034C	LYS1	20385592	2010 Aug	Unstressed log-phase growth (control)	Positive	Indirect	Microarray analysis - wt vs TF mutant
YKL112W	ABF1	YIR035C	NRE1	20385592	2010 Aug	Unstressed log-phase growth (control)	Positive	Indirect	Microarray analysis - wt vs TF mutant
YKL112W	ABF1	YIR036C	IRC24	20385592	2010 Aug	Unstressed log-phase growth (control)	Positive	Indirect	Microarray analysis - wt vs TF mutant
YKL112W	ABF1	YIR038C	GTT1	20385592	2010 Aug	Unstressed log-phase growth (control)	Positive	Indirect	Microarray analysis - wt vs TF mutant
YKL112W	ABF1	YIR042C	YIR042C	15192094	2004 Aug 13	Unstressed log-phase growth (control)	Negative	Indirect	Microarray analysis - wt vs TF mutant
YKL112W	ABF1	YIR043C	YIR043C	20385592	2010 Aug	Unstressed log-phase growth (control)	Positive	Indirect	Microarray analysis - wt vs TF mutant
YKL112W	ABF1	YIR044C	YIR044C	20385592	2010 Aug	Unstressed log-phase growth (control)	Positive	Indirect	Microarray analysis - wt vs TF mutant
YKL112W	ABF1	YJL001W	PRE3	20385592	2010 Aug	Unstressed log-phase growth (control)	Positive	Indirect	Microarray analysis - wt vs TF mutant
YKL112W	ABF1	YJL002C	OST1	20385592	2010 Aug	Unstressed log-phase growth (control)	Positive	Indirect	Microarray analysis - wt vs TF mutant
YKL112W	ABF1	YJL006C	CTK2	20385592	2010 Aug	Unstressed log-phase growth (control)	Positive	Indirect	Microarray analysis - wt vs TF mutant
YKL112W	ABF1	YJL008C	CCT8	15343339	2004 Sep 2	N/A	N/A	Direct	Chip-on-chip
YKL112W	ABF1	YJL008C	CCT8	16709784	2006 May 19	N/A	N/A	Direct	Chip-on-chip
YKL112W	ABF1	YJL010C	NOP9	20385592	2010 Aug	Unstressed log-phase growth (control)	Positive	Indirect	Microarray analysis - wt vs TF mutant
YKL112W	ABF1	YJL013C	MAD3	20385592	2010 Aug	Unstressed log-phase growth (control)	Positive	Indirect	Microarray analysis - wt vs TF mutant
YKL112W	ABF1	YJL026W	RNR2	20385592	2010 Aug	Unstressed log-phase growth (control)	Positive	Indirect	Microarray analysis - wt vs TF mutant
YKL112W	ABF1	YJL027C	YJL027C	20385592	2010 Aug	Unstressed log-phase growth (control)	Positive	Indirect	Microarray analysis - wt vs TF mutant
YKL112W	ABF1	YJL034W	KAR2	16880382	2006 Aug 8	Carbon source quality/availability	Positive	Indirect	Microarray analysis (WT vs TF overexpression)
YKL112W	ABF1	YJL034W	KAR2	20385592	2010 Aug	Unstressed log-phase growth (control)	Positive	Indirect	Microarray analysis - wt vs TF mutant
YKL112W	ABF1	YJL037W	IRC18	16880382	2006 Aug 8	Carbon source quality/availability	Positive	Indirect	Microarray analysis (WT vs TF overexpression)
YKL112W	ABF1	YJL037W	IRC18	20385592	2010 Aug	Unstressed log-phase growth (control)	Positive	Indirect	Microarray analysis - wt vs TF mutant
YKL112W	ABF1	YJL046W	AIM22	20385592	2010 Aug	Unstressed log-phase growth (control)	Positive	Indirect	Microarray analysis - wt vs TF mutant
YKL112W	ABF1	YJL048C	UBX6	20385592	2010 Aug	Unstressed log-phase growth (control)	Positive	Indirect	Microarray analysis - wt vs TF mutant
YKL112W	ABF1	YJL052W	TDH1	20385592	2010 Aug	Unstressed log-phase growth (control)	Positive	Indirect	Microarray analysis - wt vs TF mutant
YKL112W	ABF1	YJL055W	LOG1	15192094	2004 Aug 13	Unstressed log-phase growth (control)	Positive	Indirect	Microarray analysis - wt vs TF mutant
YKL112W	ABF1	YJL056C	ZAP1	20385592	2010 Aug	Unstressed log-phase growth (control)	Positive	Indirect	Microarray analysis - wt vs TF mutant
YKL112W	ABF1	YJL058C	BIT61	20385592	2010 Aug	Unstressed log-phase growth (control)	Positive	Indirect	Microarray analysis - wt vs TF mutant
YKL112W	ABF1	YJL059W	YHC3	20385592	2010 Aug	Unstressed log-phase growth (control)	Positive	Indirect	Microarray analysis - wt vs TF mutant
YKL112W	ABF1	YJL060W	BNA3	20385592	2010 Aug	Unstressed log-phase growth (control)	Positive	Indirect	Microarray analysis - wt vs TF mutant
YKL112W	ABF1	YJL062W	LAS21	15343339	2004 Sep 2	N/A	N/A	Direct	Chip-on-chip
YKL112W	ABF1	YJL063C	MRPL8	15343339	2004 Sep 2	N/A	N/A	Direct	Chip-on-chip
YKL112W	ABF1	YJL063C	MRPL8	20385592	2010 Aug	Unstressed log-phase growth (control)	Positive	Indirect	Microarray analysis - wt vs TF mutant
YKL112W	ABF1	YJL067W	Uncharacterized	20385592	2010 Aug	Unstressed log-phase growth (control)	Positive	Indirect	Microarray analysis - wt vs TF mutant
YKL112W	ABF1	YJL068C	YJL068C	20385592	2010 Aug	Unstressed log-phase growth (control)	Positive	Indirect	Microarray analysis - wt vs TF mutant
YKL112W	ABF1	YJL079C	PRY1	16880382	2006 Aug 8	Carbon source quality/availability	Positive	Indirect	Microarray analysis (WT vs TF overexpression)
YKL112W	ABF1	YJL079C	PRY1	20385592	2010 Aug	Unstressed log-phase growth (control)	Positive	Indirect	Microarray analysis - wt vs TF mutant
YKL112W	ABF1	YJL086C	Uncharacterized	20385592	2010 Aug	Unstressed log-phase growth (control)	Negative	Indirect	Microarray analysis - wt vs TF mutant
YKL112W	ABF1	YJL108C	PRM10	20385592	2010 Aug	Unstressed log-phase growth (control)	Positive	Indirect	Microarray analysis - wt vs TF mutant
YKL112W	ABF1	YJL111W	CCT7	15343339	2004 Sep 2	N/A	N/A	Direct	Chip-on-chip
YKL112W	ABF1	YJL118W	YJL118W	20385592	2010 Aug	Unstressed log-phase growth (control)	Positive	Indirect	Microarray analysis - wt vs TF mutant
YKL112W	ABF1	YJL119C	Uncharacterized	20385592	2010 Aug	Unstressed log-phase growth (control)	Positive	Indirect	Microarray analysis - wt vs TF mutant
YKL112W	ABF1	YJL121C	RPE1	20385592	2010 Aug	Unstressed log-phase growth (control)	Positive	Indirect	Microarray analysis - wt vs TF mutant
YKL112W	ABF1	YJL142C	Uncharacterized	20385592	2010 Aug	Unstressed log-phase growth (control)	Positive	Indirect	Microarray analysis - wt vs TF mutant
YKL112W	ABF1	YJL145W	SFH5	20385592	2010 Aug	Unstressed log-phase growth (control)	Positive	Indirect	Microarray analysis - wt vs TF mutant
YKL112W	ABF1	YJL153C	INO1	16709784	2006 May 19	N/A	N/A	Direct	Chip-on-chip
YKL112W	ABF1	YJL158C	CIS3	20385592	2010 Aug	Unstressed log-phase growth (control)	Positive	Indirect	Microarray analysis - wt vs TF mutant
YKL112W	ABF1	YJL161W	FMP33	20385592	2010 Aug	Unstressed log-phase growth (control)	Positive	Indirect	Microarray analysis - wt vs TF mutant
YKL112W	ABF1	YJL166W	QCR8	1317009	1992 Jun	Carbon source quality/availability	Positive	Indirect	Northern - wt vs TF mutant
YKL112W	ABF1	YJL166W	QCR8	9677425	1998 Jul 31	Unstressed log-phase growth (control)	N/A	Direct	DNA footprinting
YKL112W	ABF1	YJL166W	QCR8	25748434	2015 Mar 5	Stress	N/A	Direct	ChIP
YKL112W	ABF1	YJL171C	TOH1	20385592	2010 Aug	Unstressed log-phase growth (control)	Positive	Indirect	Microarray analysis - wt vs TF mutant
YKL112W	ABF1	YJL174W	KRE9	15343339	2004 Sep 2	N/A	N/A	Direct	Chip-on-chip
YKL112W	ABF1	YJL174W	KRE9	16709784	2006 May 19	N/A	N/A	Direct	Chip-on-chip
YKL112W	ABF1	YJL174W	KRE9	20385592	2010 Aug	Unstressed log-phase growth (control)	Positive	Indirect	Microarray analysis - wt vs TF mutant
YKL112W	ABF1	YJL176C	SWI3	15343339	2004 Sep 2	N/A	N/A	Direct	Chip-on-chip
YKL112W	ABF1	YJL176C	SWI3	16709784	2006 May 19	N/A	N/A	Direct	Chip-on-chip
YKL112W	ABF1	YJL180C	ATP12	16880382	2006 Aug 8	Carbon source quality/availability	Positive	Indirect	Microarray analysis (WT vs TF overexpression)
YKL112W	ABF1	YJL180C	ATP12	20385592	2010 Aug	Unstressed log-phase growth (control)	Positive	Indirect	Microarray analysis - wt vs TF mutant
YKL112W	ABF1	YJL183W	MNN11	15343339	2004 Sep 2	N/A	N/A	Direct	Chip-on-chip
YKL112W	ABF1	YJL183W	MNN11	16709784	2006 May 19	N/A	N/A	Direct	Chip-on-chip
YKL112W	ABF1	YJL183W	MNN11	20385592	2010 Aug	Unstressed log-phase growth (control)	Positive	Indirect	Microarray analysis - wt vs TF mutant
YKL112W	ABF1	YJL184W	GON7	20385592	2010 Aug	Unstressed log-phase growth (control)	Positive	Indirect	Microarray analysis - wt vs TF mutant
YKL112W	ABF1	YJL186W	MNN5	20385592	2010 Aug	Unstressed log-phase growth (control)	Positive	Indirect	Microarray analysis - wt vs TF mutant
YKL112W	ABF1	YJL191W	RPS14B	20385592	2010 Aug	Unstressed log-phase growth (control)	Positive	Indirect	Microarray analysis - wt vs TF mutant
YKL112W	ABF1	YJL196C	ELO1	20385592	2010 Aug	Unstressed log-phase growth (control)	Positive	Indirect	Microarray analysis - wt vs TF mutant
YKL112W	ABF1	YJL200C	ACO2	16880382	2006 Aug 8	Carbon source quality/availability	Positive	Indirect	Microarray analysis (WT vs TF overexpression)
YKL112W	ABF1	YJL200C	ACO2	20385592	2010 Aug	Unstressed log-phase growth (control)	Negative	Indirect	Microarray analysis - wt vs TF mutant
YKL112W	ABF1	YJL201W	ECM25	15343339	2004 Sep 2	N/A	N/A	Direct	Chip-on-chip
YKL112W	ABF1	YJL201W	ECM25	16709784	2006 May 19	N/A	N/A	Direct	Chip-on-chip
YKL112W	ABF1	YJL201W	ECM25	20385592	2010 Aug	Unstressed log-phase growth (control)	Positive	Indirect	Microarray analysis - wt vs TF mutant
YKL112W	ABF1	YJL202C	Uncharacterized	15343339	2004 Sep 2	N/A	N/A	Direct	Chip-on-chip
YKL112W	ABF1	YJL203W	PRP21	20385592	2010 Aug	Unstressed log-phase growth (control)	Positive	Indirect	Microarray analysis - wt vs TF mutant
YKL112W	ABF1	YJL212C	OPT1	20385592	2010 Aug	Unstressed log-phase growth (control)	Positive	Indirect	Microarray analysis - wt vs TF mutant
YKL112W	ABF1	YJL216C	IMA5	20385592	2010 Aug	Unstressed log-phase growth (control)	Positive	Indirect	Microarray analysis - wt vs TF mutant
YKL112W	ABF1	YJL217W	REE1	20385592	2010 Aug	Unstressed log-phase growth (control)	Positive	Indirect	Microarray analysis - wt vs TF mutant
YKL112W	ABF1	YJL222W	VTH2	16880382	2006 Aug 8	Carbon source quality/availability	Positive	Indirect	Microarray analysis (WT vs TF overexpression)
YKL112W	ABF1	YJL222W	VTH2	20385592	2010 Aug	Unstressed log-phase growth (control)	Positive	Indirect	Microarray analysis - wt vs TF mutant
YKL112W	ABF1	YJR002W	MPP10	20385592	2010 Aug	Unstressed log-phase growth (control)	Negative	Indirect	Microarray analysis - wt vs TF mutant
YKL112W	ABF1	YJR009C	TDH2	20385592	2010 Aug	Unstressed log-phase growth (control)	Positive	Indirect	Microarray analysis - wt vs TF mutant
YKL112W	ABF1	YJR015W	YJR015W	20385592	2010 Aug	Unstressed log-phase growth (control)	Positive	Indirect	Microarray analysis - wt vs TF mutant
YKL112W	ABF1	YJR017C	ESS1	20385592	2010 Aug	Unstressed log-phase growth (control)	Positive	Indirect	Microarray analysis - wt vs TF mutant
YKL112W	ABF1	YJR020W	Uncharacterized	20385592	2010 Aug	Unstressed log-phase growth (control)	Positive	Indirect	Microarray analysis - wt vs TF mutant
YKL112W	ABF1	YJR027W	YJR027W	20385592	2010 Aug	Unstressed log-phase growth (control)	Positive	Indirect	Microarray analysis - wt vs TF mutant
YKL112W	ABF1	YJR029W	YJR029W	20385592	2010 Aug	Unstressed log-phase growth (control)	Positive	Indirect	Microarray analysis - wt vs TF mutant
YKL112W	ABF1	YJR032W	CPR7	20385592	2010 Aug	Unstressed log-phase growth (control)	Positive	Indirect	Microarray analysis - wt vs TF mutant
YKL112W	ABF1	YJR040W	GEF1	20385592	2010 Aug	Unstressed log-phase growth (control)	Positive	Indirect	Microarray analysis - wt vs TF mutant
YKL112W	ABF1	YJR042W	NUP85	20385592	2010 Aug	Unstressed log-phase growth (control)	Positive	Indirect	Microarray analysis - wt vs TF mutant
YKL112W	ABF1	YJR043C	POL32	20385592	2010 Aug	Unstressed log-phase growth (control)	Positive	Indirect	Microarray analysis - wt vs TF mutant
YKL112W	ABF1	YJR045C	SSC1	20385592	2010 Aug	Unstressed log-phase growth (control)	Positive	Indirect	Microarray analysis - wt vs TF mutant
YKL112W	ABF1	YJR046W	TAH11	20385592	2010 Aug	Unstressed log-phase growth (control)	Positive	Indirect	Microarray analysis - wt vs TF mutant
YKL112W	ABF1	YJR048W	CYC1	16880382	2006 Aug 8	Carbon source quality/availability	Negative	Indirect	Microarray analysis (WT vs TF overexpression)
YKL112W	ABF1	YJR048W	CYC1	20385592	2010 Aug	Unstressed log-phase growth (control)	Positive	Indirect	Microarray analysis - wt vs TF mutant
YKL112W	ABF1	YJR049C	UTR1	20385592	2010 Aug	Unstressed log-phase growth (control)	Positive	Indirect	Microarray analysis - wt vs TF mutant
YKL112W	ABF1	YJR051W	OSM1	20385592	2010 Aug	Unstressed log-phase growth (control)	Positive	Indirect	Microarray analysis - wt vs TF mutant
YKL112W	ABF1	YJR058C	APS2	20385592	2010 Aug	Unstressed log-phase growth (control)	Positive	Indirect	Microarray analysis - wt vs TF mutant
YKL112W	ABF1	YJR062C	NTA1	15343339	2004 Sep 2	N/A	N/A	Direct	Chip-on-chip
YKL112W	ABF1	YJR062C	NTA1	20385592	2010 Aug	Unstressed log-phase growth (control)	Positive	Indirect	Microarray analysis - wt vs TF mutant
YKL112W	ABF1	YJR063W	RPA12	15343339	2004 Sep 2	N/A	N/A	Direct	Chip-on-chip
YKL112W	ABF1	YJR063W	RPA12	16880382	2006 Aug 8	Carbon source quality/availability	Negative	Indirect	Microarray analysis (WT vs TF overexpression)
YKL112W	ABF1	YJR063W	RPA12	28158860	2017 May 5	Unstressed log-phase growth (control)	N/A	Direct	ChIP-seq
YKL112W	ABF1	YJR070C	LIA1	20385592	2010 Aug	Unstressed log-phase growth (control)	Positive	Indirect	Microarray analysis - wt vs TF mutant
YKL112W	ABF1	YJR075W	HOC1	20385592	2010 Aug	Unstressed log-phase growth (control)	Positive	Indirect	Microarray analysis - wt vs TF mutant
YKL112W	ABF1	YJR077C	MIR1	20385592	2010 Aug	Unstressed log-phase growth (control)	Positive	Indirect	Microarray analysis - wt vs TF mutant
YKL112W	ABF1	YJR078W	BNA2	15192094	2004 Aug 13	Unstressed log-phase growth (control)	Negative	Indirect	Microarray analysis - wt vs TF mutant
YKL112W	ABF1	YJR080C	AIM24	20385592	2010 Aug	Unstressed log-phase growth (control)	Positive	Indirect	Microarray analysis - wt vs TF mutant
YKL112W	ABF1	YJR082C	EAF6	20385592	2010 Aug	Unstressed log-phase growth (control)	Positive	Indirect	Microarray analysis - wt vs TF mutant
YKL112W	ABF1	YJR087W	Uncharacterized	20385592	2010 Aug	Unstressed log-phase growth (control)	Positive	Indirect	Microarray analysis - wt vs TF mutant
YKL112W	ABF1	YJR089W	BIR1	20385592	2010 Aug	Unstressed log-phase growth (control)	Positive	Indirect	Microarray analysis - wt vs TF mutant
YKL112W	ABF1	YJR093C	FIP1	15343339	2004 Sep 2	N/A	N/A	Direct	Chip-on-chip
YKL112W	ABF1	YJR093C	FIP1	16709784	2006 May 19	N/A	N/A	Direct	Chip-on-chip
YKL112W	ABF1	YJR093C	FIP1	17158163	2007	Stress	Positive	Indirect	Microarray analysis (WT vs TF mutant)
YKL112W	ABF1	YJR102C	VPS25	16880382	2006 Aug 8	Carbon source quality/availability	Negative	Indirect	Microarray analysis (WT vs TF overexpression)
YKL112W	ABF1	YJR102C	VPS25	20385592	2010 Aug	Unstressed log-phase growth (control)	Positive	Indirect	Microarray analysis - wt vs TF mutant
YKL112W	ABF1	YJR104C	SOD1	20385592	2010 Aug	Unstressed log-phase growth (control)	Positive	Indirect	Microarray analysis - wt vs TF mutant
YKL112W	ABF1	YJR105W	ADO1	20385592	2010 Aug	Unstressed log-phase growth (control)	Positive	Indirect	Microarray analysis - wt vs TF mutant
YKL112W	ABF1	YJR108W	ABM1	20385592	2010 Aug	Unstressed log-phase growth (control)	Negative	Indirect	Microarray analysis - wt vs TF mutant
YKL112W	ABF1	YJR116W	TDA4	15343339	2004 Sep 2	N/A	N/A	Direct	Chip-on-chip
YKL112W	ABF1	YJR118C	ILM1	20385592	2010 Aug	Unstressed log-phase growth (control)	Positive	Indirect	Microarray analysis - wt vs TF mutant
YKL112W	ABF1	YJR127C	RSF2	15343339	2004 Sep 2	N/A	N/A	Direct	Chip-on-chip
YKL112W	ABF1	YJR130C	STR2	20385592	2010 Aug	Unstressed log-phase growth (control)	Positive	Indirect	Microarray analysis - wt vs TF mutant
YKL112W	ABF1	YJR137C	MET5	15343339	2004 Sep 2	N/A	N/A	Direct	Chip-on-chip
YKL112W	ABF1	YJR137C	MET5	20385592	2010 Aug	Unstressed log-phase growth (control)	Positive	Indirect	Microarray analysis - wt vs TF mutant
YKL112W	ABF1	YJR138W	IML1	15343339	2004 Sep 2	N/A	N/A	Direct	Chip-on-chip
YKL112W	ABF1	YJR146W	YJR146W	20385592	2010 Aug	Unstressed log-phase growth (control)	Positive	Indirect	Microarray analysis - wt vs TF mutant
YKL112W	ABF1	YJR147W	HMS2	20385592	2010 Aug	Unstressed log-phase growth (control)	Positive	Indirect	Microarray analysis - wt vs TF mutant
YKL112W	ABF1	YJR148W	BAT2	20385592	2010 Aug	Unstressed log-phase growth (control)	Positive	Indirect	Microarray analysis - wt vs TF mutant
YKL112W	ABF1	YJR149W	YJR149W	20385592	2010 Aug	Unstressed log-phase growth (control)	Positive	Indirect	Microarray analysis - wt vs TF mutant
YKL112W	ABF1	YJR150C	DAN1	20385592	2010 Aug	Unstressed log-phase growth (control)	Negative	Indirect	Microarray analysis - wt vs TF mutant
YKL112W	ABF1	YJR162C	Uncharacterized	15192094	2004 Aug 13	Unstressed log-phase growth (control)	Negative	Indirect	Microarray analysis - wt vs TF mutant
YKL112W	ABF1	YKL004W	AUR1	15343339	2004 Sep 2	N/A	N/A	Direct	Chip-on-chip
YKL112W	ABF1	YKL004W	AUR1	16880382	2006 Aug 8	Carbon source quality/availability	Positive	Indirect	Microarray analysis (WT vs TF overexpression)
YKL112W	ABF1	YKL005C	BYE1	15343339	2004 Sep 2	N/A	N/A	Direct	Chip-on-chip
YKL112W	ABF1	YKL005C	BYE1	20385592	2010 Aug	Unstressed log-phase growth (control)	Negative	Indirect	Microarray analysis - wt vs TF mutant
YKL112W	ABF1	YKL007W	CAP1	15343339	2004 Sep 2	N/A	N/A	Direct	Chip-on-chip
YKL112W	ABF1	YKL008C	LAC1	15343339	2004 Sep 2	N/A	N/A	Direct	Chip-on-chip
YKL112W	ABF1	YKL008C	LAC1	20385592	2010 Aug	Unstressed log-phase growth (control)	Positive	Indirect	Microarray analysis - wt vs TF mutant
YKL112W	ABF1	YKL014C	URB1	15343339	2004 Sep 2	N/A	N/A	Direct	Chip-on-chip
YKL112W	ABF1	YKL014C	URB1	28158860	2017 May 5	Unstressed log-phase growth (control)	N/A	Direct	ChIP-seq
YKL112W	ABF1	YKL015W	PUT3	15343339	2004 Sep 2	N/A	N/A	Direct	Chip-on-chip
YKL112W	ABF1	YKL016C	ATP7	15343339	2004 Sep 2	N/A	N/A	Direct	Chip-on-chip
YKL112W	ABF1	YKL017C	HCS1	20385592	2010 Aug	Unstressed log-phase growth (control)	Negative	Indirect	Microarray analysis - wt vs TF mutant
YKL112W	ABF1	YKL026C	GPX1	15192094	2004 Aug 13	Unstressed log-phase growth (control)	Negative	Indirect	Microarray analysis - wt vs TF mutant
YKL112W	ABF1	YKL026C	GPX1	20385592	2010 Aug	Unstressed log-phase growth (control)	Positive	Indirect	Microarray analysis - wt vs TF mutant
YKL112W	ABF1	YKL028W	TFA1	15343339	2004 Sep 2	N/A	N/A	Direct	Chip-on-chip
YKL112W	ABF1	YKL029C	MAE1	15343339	2004 Sep 2	N/A	N/A	Direct	Chip-on-chip
YKL112W	ABF1	YKL029C	MAE1	20385592	2010 Aug	Unstressed log-phase growth (control)	Positive	Indirect	Microarray analysis - wt vs TF mutant
YKL112W	ABF1	YKL030W	Uncharacterized	20385592	2010 Aug	Unstressed log-phase growth (control)	Positive	Indirect	Microarray analysis - wt vs TF mutant
YKL112W	ABF1	YKL035W	UGP1	20385592	2010 Aug	Unstressed log-phase growth (control)	Positive	Indirect	Microarray analysis - wt vs TF mutant
YKL112W	ABF1	YKL046C	DCW1	20385592	2010 Aug	Unstressed log-phase growth (control)	Positive	Indirect	Microarray analysis - wt vs TF mutant
YKL112W	ABF1	YKL060C	FBA1	15343339	2004 Sep 2	N/A	N/A	Direct	Chip-on-chip
YKL112W	ABF1	YKL069W	YKL069W	15192094	2004 Aug 13	Unstressed log-phase growth (control)	Positive	Indirect	Microarray analysis - wt vs TF mutant
YKL112W	ABF1	YKL069W	YKL069W	16880382	2006 Aug 8	Carbon source quality/availability	Negative	Indirect	Microarray analysis (WT vs TF overexpression)
YKL112W	ABF1	YKL069W	YKL069W	17158163	2007	Stress	Positive	Indirect	Microarray analysis (WT vs TF mutant)
YKL112W	ABF1	YKL069W	YKL069W	20385592	2010 Aug	Unstressed log-phase growth (control)	Positive	Indirect	Microarray analysis - wt vs TF mutant
YKL112W	ABF1	YKL078W	DHR2	15343339	2004 Sep 2	N/A	N/A	Direct	Chip-on-chip
YKL112W	ABF1	YKL078W	DHR2	16709784	2006 May 19	N/A	N/A	Direct	Chip-on-chip
YKL112W	ABF1	YKL078W	DHR2	28158860	2017 May 5	Unstressed log-phase growth (control)	N/A	Direct	ChIP-seq
YKL112W	ABF1	YKL085W	MDH1	20385592	2010 Aug	Unstressed log-phase growth (control)	Positive	Indirect	Microarray analysis - wt vs TF mutant
YKL112W	ABF1	YKL086W	SRX1	20385592	2010 Aug	Unstressed log-phase growth (control)	Positive	Indirect	Microarray analysis - wt vs TF mutant
YKL112W	ABF1	YKL096W	CWP1	20385592	2010 Aug	Unstressed log-phase growth (control)	Positive	Indirect	Microarray analysis - wt vs TF mutant
YKL112W	ABF1	YKL100C	YPF1	20385592	2010 Aug	Unstressed log-phase growth (control)	Positive	Indirect	Microarray analysis - wt vs TF mutant
YKL112W	ABF1	YKL104C	GFA1	20385592	2010 Aug	Unstressed log-phase growth (control)	Positive	Indirect	Microarray analysis - wt vs TF mutant
YKL112W	ABF1	YKL111C	Uncharacterized	15192094	2004 Aug 13	Unstressed log-phase growth (control)	Negative	Indirect	Microarray analysis - wt vs TF mutant
YKL112W	ABF1	YKL112W	ABF1	15192094	2004 Aug 13	Unstressed log-phase growth (control)	N/A	Direct	ChIP
YKL112W	ABF1	YKL112W	ABF1	16880382	2006 Aug 8	Carbon source quality/availability	Positive	Indirect	Microarray analysis (WT vs TF overexpression)
YKL112W	ABF1	YKL114C	APN1	20385592	2010 Aug	Unstressed log-phase growth (control)	Positive	Indirect	Microarray analysis - wt vs TF mutant
YKL112W	ABF1	YKL135C	APL2	15343339	2004 Sep 2	N/A	N/A	Direct	Chip-on-chip
YKL112W	ABF1	YKL137W	CMC1	20385592	2010 Aug	Unstressed log-phase growth (control)	Positive	Indirect	Microarray analysis - wt vs TF mutant
YKL112W	ABF1	YKL140W	TGL1	20385592	2010 Aug	Unstressed log-phase growth (control)	Positive	Indirect	Microarray analysis - wt vs TF mutant
YKL112W	ABF1	YKL142W	MRP8	20385592	2010 Aug	Unstressed log-phase growth (control)	Positive	Indirect	Microarray analysis - wt vs TF mutant
YKL112W	ABF1	YKL143W	LTV1	15343339	2004 Sep 2	N/A	N/A	Direct	Chip-on-chip
YKL112W	ABF1	YKL143W	LTV1	16709784	2006 May 19	N/A	N/A	Direct	Chip-on-chip
YKL112W	ABF1	YKL143W	LTV1	27016735	2016 Jul 27	Unstressed log-phase growth (control)	N/A	Direct	ChIP
YKL112W	ABF1	YKL143W	LTV1	28158860	2017 May 5	Unstressed log-phase growth (control)	N/A	Direct	ChIP
YKL112W	ABF1	YKL143W	LTV1	28158860	2017 May 5	Unstressed log-phase growth (control)	N/A	Direct	ChIP-seq
YKL112W	ABF1	YKL143W	LTV1	28158860	2017 May 5	Unstressed log-phase growth (control)	Positive	Indirect	RT-PCR - wt vs TFBS mutant
YKL112W	ABF1	YKL143W	LTV1	28158860	2017 May 5	Unstressed log-phase growth (control)	Positive	Indirect	RT-PCR - wt vs TFBS mutant
YKL112W	ABF1	YKL144C	RPC25	15343339	2004 Sep 2	N/A	N/A	Direct	Chip-on-chip
YKL112W	ABF1	YKL144C	RPC25	16709784	2006 May 19	N/A	N/A	Direct	Chip-on-chip
YKL112W	ABF1	YKL150W	MCR1	20385592	2010 Aug	Unstressed log-phase growth (control)	Positive	Indirect	Microarray analysis - wt vs TF mutant
YKL112W	ABF1	YKL153W	Uncharacterized	20385592	2010 Aug	Unstressed log-phase growth (control)	Positive	Indirect	Microarray analysis - wt vs TF mutant
YKL112W	ABF1	YKL159C	RCN1	20385592	2010 Aug	Unstressed log-phase growth (control)	Positive	Indirect	Microarray analysis - wt vs TF mutant
YKL112W	ABF1	YKL161C	KDX1	20385592	2010 Aug	Unstressed log-phase growth (control)	Positive	Indirect	Microarray analysis - wt vs TF mutant
YKL112W	ABF1	YKL163W	PIR3	20385592	2010 Aug	Unstressed log-phase growth (control)	Positive	Indirect	Microarray analysis - wt vs TF mutant
YKL112W	ABF1	YKL167C	MRP49	15343339	2004 Sep 2	N/A	N/A	Direct	Chip-on-chip
YKL112W	ABF1	YKL167C	MRP49	16880382	2006 Aug 8	Carbon source quality/availability	Negative	Indirect	Microarray analysis (WT vs TF overexpression)
YKL112W	ABF1	YKL167C	MRP49	20385592	2010 Aug	Unstressed log-phase growth (control)	Positive	Indirect	Microarray analysis - wt vs TF mutant
YKL112W	ABF1	YKL168C	KKQ8	20385592	2010 Aug	Unstressed log-phase growth (control)	Positive	Indirect	Microarray analysis - wt vs TF mutant
YKL112W	ABF1	YKL169C	Uncharacterized	20385592	2010 Aug	Unstressed log-phase growth (control)	Positive	Indirect	Microarray analysis - wt vs TF mutant
YKL112W	ABF1	YKL170W	MRPL38	20385592	2010 Aug	Unstressed log-phase growth (control)	Positive	Indirect	Microarray analysis - wt vs TF mutant
YKL112W	ABF1	YKL171W	NNK1	20385592	2010 Aug	Unstressed log-phase growth (control)	Positive	Indirect	Microarray analysis - wt vs TF mutant
YKL112W	ABF1	YKL172W	EBP2	15343339	2004 Sep 2	N/A	N/A	Direct	Chip-on-chip
YKL112W	ABF1	YKL172W	EBP2	16709784	2006 May 19	N/A	N/A	Direct	Chip-on-chip
YKL112W	ABF1	YKL172W	EBP2	28158860	2017 May 5	Unstressed log-phase growth (control)	N/A	Direct	ChIP-seq
YKL112W	ABF1	YKL174C	TPO5	20385592	2010 Aug	Unstressed log-phase growth (control)	Positive	Indirect	Microarray analysis - wt vs TF mutant
YKL112W	ABF1	YKL177W	Uncharacterized	20385592	2010 Aug	Unstressed log-phase growth (control)	Positive	Indirect	Microarray analysis - wt vs TF mutant
YKL112W	ABF1	YKL178C	STE3	20385592	2010 Aug	Unstressed log-phase growth (control)	Positive	Indirect	Microarray analysis - wt vs TF mutant
YKL112W	ABF1	YKL179C	COY1	20385592	2010 Aug	Unstressed log-phase growth (control)	Positive	Indirect	Microarray analysis - wt vs TF mutant
YKL112W	ABF1	YKL182W	FAS1	7925441	1994 Oct 1	Unstressed log-phase growth (control)	Positive	Indirect	lacZ - wt vs. Mutant promoter region
YKL112W	ABF1	YKL183W	LOT5	20385592	2010 Aug	Unstressed log-phase growth (control)	Positive	Indirect	Microarray analysis - wt vs TF mutant
YKL112W	ABF1	YKL190W	CNB1	15343339	2004 Sep 2	N/A	N/A	Direct	Chip-on-chip
YKL112W	ABF1	YKL190W	CNB1	16709784	2006 May 19	N/A	N/A	Direct	Chip-on-chip
YKL112W	ABF1	YKL190W	CNB1	25748434	2015 Mar 5	Stress	N/A	Direct	ChIP
YKL112W	ABF1	YKL192C	ACP1	20385592	2010 Aug	Unstressed log-phase growth (control)	Positive	Indirect	Microarray analysis - wt vs TF mutant
YKL112W	ABF1	YKL195W	MIA40	15343339	2004 Sep 2	N/A	N/A	Direct	Chip-on-chip
YKL112W	ABF1	YKL195W	MIA40	16709784	2006 May 19	N/A	N/A	Direct	Chip-on-chip
YKL112W	ABF1	YKL196C	YKT6	15343339	2004 Sep 2	N/A	N/A	Direct	Chip-on-chip
YKL112W	ABF1	YKL196C	YKT6	16709784	2006 May 19	N/A	N/A	Direct	Chip-on-chip
YKL112W	ABF1	YKL203C	TOR2	20385592	2010 Aug	Unstressed log-phase growth (control)	Positive	Indirect	Microarray analysis - wt vs TF mutant
YKL112W	ABF1	YKL207W	EMC3	15192094	2004 Aug 13	Unstressed log-phase growth (control)	Positive	Indirect	Microarray analysis - wt vs TF mutant
YKL112W	ABF1	YKL207W	EMC3	20385592	2010 Aug	Unstressed log-phase growth (control)	Positive	Indirect	Microarray analysis - wt vs TF mutant
YKL112W	ABF1	YKL211C	TRP3	8195216	1994 Jun 3	In vitro	N/A	Direct	EMSA
YKL112W	ABF1	YKL211C	TRP3	15192094	2004 Aug 13	Unstressed log-phase growth (control)	N/A	Direct	ChIP
YKL112W	ABF1	YKL211C	TRP3	20385592	2010 Aug	Unstressed log-phase growth (control)	Positive	Indirect	Microarray analysis - wt vs TF mutant
YKL112W	ABF1	YKL214C	YRA2	20385592	2010 Aug	Unstressed log-phase growth (control)	Positive	Indirect	Microarray analysis - wt vs TF mutant
YKL112W	ABF1	YKL217W	JEN1	20385592	2010 Aug	Unstressed log-phase growth (control)	Positive	Indirect	Microarray analysis - wt vs TF mutant
YKL112W	ABF1	YKL218C	SRY1	20385592	2010 Aug	Unstressed log-phase growth (control)	Positive	Indirect	Microarray analysis - wt vs TF mutant
YKL112W	ABF1	YKL223W	Uncharacterized	20385592	2010 Aug	Unstressed log-phase growth (control)	Positive	Indirect	Microarray analysis - wt vs TF mutant
YKL112W	ABF1	YKR004C	ECM9	20385592	2010 Aug	Unstressed log-phase growth (control)	Positive	Indirect	Microarray analysis - wt vs TF mutant
YKL112W	ABF1	YKR011C	YKR011C	20385592	2010 Aug	Unstressed log-phase growth (control)	Positive	Indirect	Microarray analysis - wt vs TF mutant
YKL112W	ABF1	YKR015C	YKR015C	20385592	2010 Aug	Unstressed log-phase growth (control)	Positive	Indirect	Microarray analysis - wt vs TF mutant
YKL112W	ABF1	YKR029C	SET3	15343339	2004 Sep 2	N/A	N/A	Direct	Chip-on-chip
YKL112W	ABF1	YKR029C	SET3	16709784	2006 May 19	N/A	N/A	Direct	Chip-on-chip
YKL112W	ABF1	YKR030W	GMH1	15343339	2004 Sep 2	N/A	N/A	Direct	Chip-on-chip
YKL112W	ABF1	YKR030W	GMH1	16709784	2006 May 19	N/A	N/A	Direct	Chip-on-chip
YKL112W	ABF1	YKR039W	GAP1	20385592	2010 Aug	Unstressed log-phase growth (control)	Positive	Indirect	Microarray analysis - wt vs TF mutant
YKL112W	ABF1	YKR046C	PLN1	16880382	2006 Aug 8	Carbon source quality/availability	Positive	Indirect	Microarray analysis (WT vs TF overexpression)
YKL112W	ABF1	YKR046C	PLN1	20385592	2010 Aug	Unstressed log-phase growth (control)	Positive	Indirect	Microarray analysis - wt vs TF mutant
YKL112W	ABF1	YKR047W	Uncharacterized	20385592	2010 Aug	Unstressed log-phase growth (control)	Positive	Indirect	Microarray analysis - wt vs TF mutant
YKL112W	ABF1	YKR049C	FMP46	20385592	2010 Aug	Unstressed log-phase growth (control)	Positive	Indirect	Microarray analysis - wt vs TF mutant
YKL112W	ABF1	YKR051W	HFL1	20385592	2010 Aug	Unstressed log-phase growth (control)	Positive	Indirect	Microarray analysis - wt vs TF mutant
YKL112W	ABF1	YKR052C	MRS4	20385592	2010 Aug	Unstressed log-phase growth (control)	Positive	Indirect	Microarray analysis - wt vs TF mutant
YKL112W	ABF1	YKR056W	TRM2	15343339	2004 Sep 2	N/A	N/A	Direct	Chip-on-chip
YKL112W	ABF1	YKR056W	TRM2	16709784	2006 May 19	N/A	N/A	Direct	Chip-on-chip
YKL112W	ABF1	YKR059W	TIF1	15343339	2004 Sep 2	N/A	N/A	Direct	Chip-on-chip
YKL112W	ABF1	YKR059W	TIF1	28158860	2017 May 5	Unstressed log-phase growth (control)	N/A	Direct	ChIP-seq
YKL112W	ABF1	YKR065C	PAM17	17158163	2007	Stress	Positive	Indirect	Microarray analysis (WT vs TF mutant)
YKL112W	ABF1	YKR065C	PAM17	20385592	2010 Aug	Unstressed log-phase growth (control)	Positive	Indirect	Microarray analysis - wt vs TF mutant
YKL112W	ABF1	YKR066C	CCP1	17158163	2007	Stress	Positive	Indirect	Microarray analysis (WT vs TF mutant)
YKL112W	ABF1	YKR066C	CCP1	20385592	2010 Aug	Unstressed log-phase growth (control)	Positive	Indirect	Microarray analysis - wt vs TF mutant
YKL112W	ABF1	YKR077W	MSA2	20385592	2010 Aug	Unstressed log-phase growth (control)	Positive	Indirect	Microarray analysis - wt vs TF mutant
YKL112W	ABF1	YKR081C	RPF2	15343339	2004 Sep 2	N/A	N/A	Direct	Chip-on-chip
YKL112W	ABF1	YKR081C	RPF2	16709784	2006 May 19	N/A	N/A	Direct	Chip-on-chip
YKL112W	ABF1	YKR081C	RPF2	28158860	2017 May 5	Unstressed log-phase growth (control)	N/A	Direct	ChIP-seq
YKL112W	ABF1	YKR082W	NUP133	15343339	2004 Sep 2	N/A	N/A	Direct	Chip-on-chip
YKL112W	ABF1	YKR082W	NUP133	16709784	2006 May 19	N/A	N/A	Direct	Chip-on-chip
YKL112W	ABF1	YKR084C	HBS1	15192094	2004 Aug 13	Unstressed log-phase growth (control)	Positive	Indirect	Microarray analysis - wt vs TF mutant
YKL112W	ABF1	YKR084C	HBS1	17158163	2007	Stress	Positive	Indirect	Microarray analysis (WT vs TF mutant)
YKL112W	ABF1	YKR088C	TVP38	20385592	2010 Aug	Unstressed log-phase growth (control)	Positive	Indirect	Microarray analysis - wt vs TF mutant
YKL112W	ABF1	YKR096W	ESL2	20385592	2010 Aug	Unstressed log-phase growth (control)	Negative	Indirect	Microarray analysis - wt vs TF mutant
YKL112W	ABF1	YKR099W	BAS1	20385592	2010 Aug	Unstressed log-phase growth (control)	Positive	Indirect	Microarray analysis - wt vs TF mutant
YKL112W	ABF1	YKR099W	BAS1	28158860	2017 May 5	Unstressed log-phase growth (control)	N/A	Direct	ChIP-seq
YKL112W	ABF1	YLL005C	SPO75	20385592	2010 Aug	Unstressed log-phase growth (control)	Positive	Indirect	Microarray analysis - wt vs TF mutant
YKL112W	ABF1	YLL006W	MMM1	20385592	2010 Aug	Unstressed log-phase growth (control)	Positive	Indirect	Microarray analysis - wt vs TF mutant
YKL112W	ABF1	YLL009C	COX17	16880382	2006 Aug 8	Carbon source quality/availability	Negative	Indirect	Microarray analysis (WT vs TF overexpression)
YKL112W	ABF1	YLL009C	COX17	20385592	2010 Aug	Unstressed log-phase growth (control)	Positive	Indirect	Microarray analysis - wt vs TF mutant
YKL112W	ABF1	YLL011W	SOF1	16709784	2006 May 19	N/A	N/A	Direct	Chip-on-chip
YKL112W	ABF1	YLL011W	SOF1	28158860	2017 May 5	Unstressed log-phase growth (control)	N/A	Direct	ChIP-seq
YKL112W	ABF1	YLL018C	DPS1	15192094	2004 Aug 13	Unstressed log-phase growth (control)	Positive	Indirect	Microarray analysis - wt vs TF mutant
YKL112W	ABF1	YLL023C	POM33	16880382	2006 Aug 8	Carbon source quality/availability	Positive	Indirect	Microarray analysis (WT vs TF overexpression)
YKL112W	ABF1	YLL023C	POM33	20385592	2010 Aug	Unstressed log-phase growth (control)	Positive	Indirect	Microarray analysis - wt vs TF mutant
YKL112W	ABF1	YLL025W	PAU17	20385592	2010 Aug	Unstressed log-phase growth (control)	Positive	Indirect	Microarray analysis - wt vs TF mutant
YKL112W	ABF1	YLL033W	IRC19	15343339	2004 Sep 2	N/A	N/A	Direct	Chip-on-chip
YKL112W	ABF1	YLL034C	RIX7	15192094	2004 Aug 13	Unstressed log-phase growth (control)	Positive	Indirect	Microarray analysis - wt vs TF mutant
YKL112W	ABF1	YLL034C	RIX7	15343339	2004 Sep 2	N/A	N/A	Direct	Chip-on-chip
YKL112W	ABF1	YLL046C	RNP1	15192094	2004 Aug 13	Unstressed log-phase growth (control)	Negative	Indirect	Microarray analysis - wt vs TF mutant
YKL112W	ABF1	YLL046C	RNP1	17158163	2007	Stress	Negative	Indirect	Microarray analysis (WT vs TF mutant)
YKL112W	ABF1	YLL051C	FRE6	20385592	2010 Aug	Unstressed log-phase growth (control)	Positive	Indirect	Microarray analysis - wt vs TF mutant
YKL112W	ABF1	YLL053C	YLL053C	15192094	2004 Aug 13	Unstressed log-phase growth (control)	Negative	Indirect	Microarray analysis - wt vs TF mutant
YKL112W	ABF1	YLL053C	YLL053C	20385592	2010 Aug	Unstressed log-phase growth (control)	Positive	Indirect	Microarray analysis - wt vs TF mutant
YKL112W	ABF1	YLL057C	JLP1	16880382	2006 Aug 8	Carbon source quality/availability	Positive	Indirect	Microarray analysis (WT vs TF overexpression)
YKL112W	ABF1	YLL057C	JLP1	20385592	2010 Aug	Unstressed log-phase growth (control)	Positive	Indirect	Microarray analysis - wt vs TF mutant
YKL112W	ABF1	YLL060C	GTT2	20385592	2010 Aug	Unstressed log-phase growth (control)	Positive	Indirect	Microarray analysis - wt vs TF mutant
YKL112W	ABF1	YLL062C	MHT1	16880382	2006 Aug 8	Carbon source quality/availability	Negative	Indirect	Microarray analysis (WT vs TF overexpression)
YKL112W	ABF1	YLL062C	MHT1	20385592	2010 Aug	Unstressed log-phase growth (control)	Positive	Indirect	Microarray analysis - wt vs TF mutant
YKL112W	ABF1	YLR003C	CMS1	16709784	2006 May 19	N/A	N/A	Direct	Chip-on-chip
YKL112W	ABF1	YLR008C	PAM18	20385592	2010 Aug	Unstressed log-phase growth (control)	Positive	Indirect	Microarray analysis - wt vs TF mutant
YKL112W	ABF1	YLR010C	TEN1	20385592	2010 Aug	Unstressed log-phase growth (control)	Positive	Indirect	Microarray analysis - wt vs TF mutant
YKL112W	ABF1	YLR011W	LOT6	20385592	2010 Aug	Unstressed log-phase growth (control)	Positive	Indirect	Microarray analysis - wt vs TF mutant
YKL112W	ABF1	YLR024C	UBR2	15343339	2004 Sep 2	N/A	N/A	Direct	Chip-on-chip
YKL112W	ABF1	YLR025W	SNF7	15343339	2004 Sep 2	N/A	N/A	Direct	Chip-on-chip
YKL112W	ABF1	YLR027C	AAT2	20385592	2010 Aug	Unstressed log-phase growth (control)	Positive	Indirect	Microarray analysis - wt vs TF mutant
YKL112W	ABF1	YLR028C	ADE16	20385592	2010 Aug	Unstressed log-phase growth (control)	Positive	Indirect	Microarray analysis - wt vs TF mutant
YKL112W	ABF1	YLR035C-A	YLR035C-A	20385592	2010 Aug	Unstressed log-phase growth (control)	Positive	Indirect	Microarray analysis - wt vs TF mutant
YKL112W	ABF1	YLR040C	AFB1	15192094	2004 Aug 13	Unstressed log-phase growth (control)	Negative	Indirect	Microarray analysis - wt vs TF mutant
YKL112W	ABF1	YLR040C	AFB1	17158163	2007	Stress	Negative	Indirect	Microarray analysis (WT vs TF mutant)
YKL112W	ABF1	YLR041W	Uncharacterized	15192094	2004 Aug 13	Unstressed log-phase growth (control)	Negative	Indirect	Microarray analysis - wt vs TF mutant
YKL112W	ABF1	YLR051C	FCF2	28158860	2017 May 5	Unstressed log-phase growth (control)	N/A	Direct	ChIP-seq
YKL112W	ABF1	YLR055C	SPT8	15343339	2004 Sep 2	N/A	N/A	Direct	Chip-on-chip
YKL112W	ABF1	YLR056W	ERG3	15343339	2004 Sep 2	N/A	N/A	Direct	Chip-on-chip
YKL112W	ABF1	YLR058C	SHM2	20385592	2010 Aug	Unstressed log-phase growth (control)	Positive	Indirect	Microarray analysis - wt vs TF mutant
YKL112W	ABF1	YLR060W	FRS1	28158860	2017 May 5	Unstressed log-phase growth (control)	N/A	Direct	ChIP-seq
YKL112W	ABF1	YLR089C	ALT1	20385592	2010 Aug	Unstressed log-phase growth (control)	Positive	Indirect	Microarray analysis - wt vs TF mutant
YKL112W	ABF1	YLR095C	IOC2	15343339	2004 Sep 2	N/A	N/A	Direct	Chip-on-chip
YKL112W	ABF1	YLR095C	IOC2	16709784	2006 May 19	N/A	N/A	Direct	Chip-on-chip
YKL112W	ABF1	YLR096W	KIN2	15343339	2004 Sep 2	N/A	N/A	Direct	Chip-on-chip
YKL112W	ABF1	YLR096W	KIN2	16709784	2006 May 19	N/A	N/A	Direct	Chip-on-chip
YKL112W	ABF1	YLR098C	CHA4	20385592	2010 Aug	Unstressed log-phase growth (control)	Positive	Indirect	Microarray analysis - wt vs TF mutant
YKL112W	ABF1	YLR117C	CLF1	16709784	2006 May 19	N/A	N/A	Direct	Chip-on-chip
YKL112W	ABF1	YLR118C	TML25	20385592	2010 Aug	Unstressed log-phase growth (control)	Positive	Indirect	Microarray analysis - wt vs TF mutant
YKL112W	ABF1	YLR153C	ACS2	9326360	1997 Sep 22	Unstressed log-phase growth (control)	N/A	Direct	EMSA
YKL112W	ABF1	YLR157C	ASP3-2	20385592	2010 Aug	Unstressed log-phase growth (control)	Positive	Indirect	Microarray analysis - wt vs TF mutant
YKL112W	ABF1	YLR158C	ASP3-3	20385592	2010 Aug	Unstressed log-phase growth (control)	Positive	Indirect	Microarray analysis - wt vs TF mutant
YKL112W	ABF1	YLR162W	YLR162W	20385592	2010 Aug	Unstressed log-phase growth (control)	Negative	Indirect	Microarray analysis - wt vs TF mutant
YKL112W	ABF1	YLR174W	IDP2	15343339	2004 Sep 2	N/A	N/A	Direct	Chip-on-chip
YKL112W	ABF1	YLR174W	IDP2	16709784	2006 May 19	N/A	N/A	Direct	Chip-on-chip
YKL112W	ABF1	YLR192C	HCR1	15192094	2004 Aug 13	Unstressed log-phase growth (control)	Positive	Indirect	Microarray analysis - wt vs TF mutant
YKL112W	ABF1	YLR195C	NMT1	15192094	2004 Aug 13	Unstressed log-phase growth (control)	Positive	Indirect	Microarray analysis - wt vs TF mutant
YKL112W	ABF1	YLR197W	NOP56	28158860	2017 May 5	Unstressed log-phase growth (control)	N/A	Direct	ChIP-seq
YKL112W	ABF1	YLR218C	COA4	20385592	2010 Aug	Unstressed log-phase growth (control)	Negative	Indirect	Microarray analysis - wt vs TF mutant
YKL112W	ABF1	YLR220W	CCC1	20385592	2010 Aug	Unstressed log-phase growth (control)	Positive	Indirect	Microarray analysis - wt vs TF mutant
YKL112W	ABF1	YLR222C	UTP13	15343339	2004 Sep 2	N/A	N/A	Direct	Chip-on-chip
YKL112W	ABF1	YLR222C	UTP13	16709784	2006 May 19	N/A	N/A	Direct	Chip-on-chip
YKL112W	ABF1	YLR222C	UTP13	28158860	2017 May 5	Unstressed log-phase growth (control)	N/A	Direct	ChIP-seq
YKL112W	ABF1	YLR229C	CDC42	15343339	2004 Sep 2	N/A	N/A	Direct	Chip-on-chip
YKL112W	ABF1	YLR229C	CDC42	20385592	2010 Aug	Unstressed log-phase growth (control)	Positive	Indirect	Microarray analysis - wt vs TF mutant
YKL112W	ABF1	YLR231C	BNA5	20385592	2010 Aug	Unstressed log-phase growth (control)	Positive	Indirect	Microarray analysis - wt vs TF mutant
YKL112W	ABF1	YLR249W	YEF3	28158860	2017 May 5	Unstressed log-phase growth (control)	N/A	Direct	ChIP-seq
YKL112W	ABF1	YLR256W	HAP1	20385592	2010 Aug	Unstressed log-phase growth (control)	Positive	Indirect	Microarray analysis - wt vs TF mutant
YKL112W	ABF1	YLR259C	HSP60	20385592	2010 Aug	Unstressed log-phase growth (control)	Positive	Indirect	Microarray analysis - wt vs TF mutant
YKL112W	ABF1	YLR264W	RPS28B	2677998	1989 Sep 25	N/A	N/A
YKL112W	ABF1	YLR264W	RPS28B	16709784	2006 May 19	N/A	N/A	Direct	Chip-on-chip
YKL112W	ABF1	YLR264W	RPS28B	27016735	2016 Jul 27	Stress	Positive	Direct	RT-PCR - wt vs TFBS mutant
YKL112W	ABF1	YLR275W	SMD2	20385592	2010 Aug	Unstressed log-phase growth (control)	Negative	Indirect	Microarray analysis - wt vs TF mutant
YKL112W	ABF1	YLR292C	SEC72	15192094	2004 Aug 13	Unstressed log-phase growth (control)	Positive	Indirect	Microarray analysis - wt vs TF mutant
YKL112W	ABF1	YLR293C	GSP1	15343339	2004 Sep 2	N/A	N/A	Direct	Chip-on-chip
YKL112W	ABF1	YLR293C	GSP1	16709784	2006 May 19	N/A	N/A	Direct	Chip-on-chip
YKL112W	ABF1	YLR304C	ACO1	20385592	2010 Aug	Unstressed log-phase growth (control)	Positive	Indirect	Microarray analysis - wt vs TF mutant
YKL112W	ABF1	YLR307W	CDA1	15192094	2004 Aug 13	Unstressed log-phase growth (control)	Negative	Indirect	Microarray analysis - wt vs TF mutant
YKL112W	ABF1	YLR307W	CDA1	16880382	2006 Aug 8	Carbon source quality/availability	Positive	Indirect	Microarray analysis (WT vs TF overexpression)
YKL112W	ABF1	YLR330W	CHS5	15343339	2004 Sep 2	N/A	N/A	Direct	Chip-on-chip
YKL112W	ABF1	YLR332W	MID2	20385592	2010 Aug	Unstressed log-phase growth (control)	Positive	Indirect	Microarray analysis - wt vs TF mutant
YKL112W	ABF1	YLR334C	Uncharacterized	20385592	2010 Aug	Unstressed log-phase growth (control)	Positive	Indirect	Microarray analysis - wt vs TF mutant
YKL112W	ABF1	YLR339C	Uncharacterized	20385592	2010 Aug	Unstressed log-phase growth (control)	Positive	Indirect	Microarray analysis - wt vs TF mutant
YKL112W	ABF1	YLR340W	RPP0	20385592	2010 Aug	Unstressed log-phase growth (control)	Positive	Indirect	Microarray analysis - wt vs TF mutant
YKL112W	ABF1	YLR343W	GAS2	16880382	2006 Aug 8	Carbon source quality/availability	Positive	Indirect	Microarray analysis (WT vs TF overexpression)
YKL112W	ABF1	YLR343W	GAS2	20385592	2010 Aug	Unstressed log-phase growth (control)	Positive	Indirect	Microarray analysis - wt vs TF mutant
YKL112W	ABF1	YLR349W	Uncharacterized	20385592	2010 Aug	Unstressed log-phase growth (control)	Positive	Indirect	Microarray analysis - wt vs TF mutant
YKL112W	ABF1	YLR350W	ORM2	20385592	2010 Aug	Unstressed log-phase growth (control)	Positive	Indirect	Microarray analysis - wt vs TF mutant
YKL112W	ABF1	YLR351C	NIT3	15192094	2004 Aug 13	Unstressed log-phase growth (control)	Positive	Indirect	Microarray analysis - wt vs TF mutant
YKL112W	ABF1	YLR351C	NIT3	17158163	2007	Stress	Positive	Indirect	Microarray analysis (WT vs TF mutant)
YKL112W	ABF1	YLR355C	ILV5	20385592	2010 Aug	Unstressed log-phase growth (control)	Positive	Indirect	Microarray analysis - wt vs TF mutant
YKL112W	ABF1	YLR356W	ATG33	20385592	2010 Aug	Unstressed log-phase growth (control)	Positive	Indirect	Microarray analysis - wt vs TF mutant
YKL112W	ABF1	YLR357W	RSC2	20385592	2010 Aug	Unstressed log-phase growth (control)	Negative	Indirect	Microarray analysis - wt vs TF mutant
YKL112W	ABF1	YLR367W	RPS22B	27016735	2016 Jul 27	Unstressed log-phase growth (control)	Positive	Direct	RT-PCR - wt vs TFBS mutant
YKL112W	ABF1	YLR372W	ELO3	20385592	2010 Aug	Unstressed log-phase growth (control)	Positive	Indirect	Microarray analysis - wt vs TF mutant
YKL112W	ABF1	YLR373C	VID22	16709784	2006 May 19	N/A	N/A	Direct	Chip-on-chip
YKL112W	ABF1	YLR374C	Uncharacterized	20385592	2010 Aug	Unstressed log-phase growth (control)	Positive	Indirect	Microarray analysis - wt vs TF mutant
YKL112W	ABF1	YLR375W	STP3	16709784	2006 May 19	N/A	N/A	Direct	Chip-on-chip
YKL112W	ABF1	YLR380W	CSR1	20385592	2010 Aug	Unstressed log-phase growth (control)	Positive	Indirect	Microarray analysis - wt vs TF mutant
YKL112W	ABF1	YLR390W-A	CCW14	20385592	2010 Aug	Unstressed log-phase growth (control)	Positive	Indirect	Microarray analysis - wt vs TF mutant
YKL112W	ABF1	YLR396C	VPS33	15343339	2004 Sep 2	N/A	N/A	Direct	Chip-on-chip
YKL112W	ABF1	YLR396C	VPS33	16709784	2006 May 19	N/A	N/A	Direct	Chip-on-chip
YKL112W	ABF1	YLR396C	VPS33	20385592	2010 Aug	Unstressed log-phase growth (control)	Positive	Indirect	Microarray analysis - wt vs TF mutant
YKL112W	ABF1	YLR398C	SKI2	20385592	2010 Aug	Unstressed log-phase growth (control)	Negative	Indirect	Microarray analysis - wt vs TF mutant
YKL112W	ABF1	YLR399C	BDF1	15343339	2004 Sep 2	N/A	N/A	Direct	Chip-on-chip
YKL112W	ABF1	YLR400W	Uncharacterized	15343339	2004 Sep 2	N/A	N/A	Direct	Chip-on-chip
YKL112W	ABF1	YLR414C	PUN1	20385592	2010 Aug	Unstressed log-phase growth (control)	Positive	Indirect	Microarray analysis - wt vs TF mutant
YKL112W	ABF1	YLR438W	CAR2	10559172	1999 Nov	Nitrogen source quality/availability	Positive	Indirect	LacZ - wt vs TF mutant
YKL112W	ABF1	YLR438W	CAR2	15192094	2004 Aug 13	Unstressed log-phase growth (control)	Negative	Indirect	Microarray analysis - wt vs TF mutant
YKL112W	ABF1	YLR452C	SST2	20385592	2010 Aug	Unstressed log-phase growth (control)	Positive	Indirect	Microarray analysis - wt vs TF mutant
YKL112W	ABF1	YLR465C	Uncharacterized	20385592	2010 Aug	Unstressed log-phase growth (control)	Negative	Indirect	Microarray analysis - wt vs TF mutant
YKL112W	ABF1	YML006C	GIS4	20385592	2010 Aug	Unstressed log-phase growth (control)	Negative	Indirect	Microarray analysis - wt vs TF mutant
YKL112W	ABF1	YML007W	YAP1	20385592	2010 Aug	Unstressed log-phase growth (control)	Negative	Indirect	Microarray analysis - wt vs TF mutant
YKL112W	ABF1	YML012W	ERV25	15343339	2004 Sep 2	N/A	N/A	Direct	Chip-on-chip
YKL112W	ABF1	YML012W	ERV25	16709784	2006 May 19	N/A	N/A	Direct	Chip-on-chip
YKL112W	ABF1	YML015C	TAF11	20385592	2010 Aug	Unstressed log-phase growth (control)	Negative	Indirect	Microarray analysis - wt vs TF mutant
YKL112W	ABF1	YML045W-A	YML045W-A	20385592	2010 Aug	Unstressed log-phase growth (control)	Positive	Indirect	Microarray analysis - wt vs TF mutant
YKL112W	ABF1	YML046W	PRP39	20385592	2010 Aug	Unstressed log-phase growth (control)	Positive	Indirect	Microarray analysis - wt vs TF mutant
YKL112W	ABF1	YML051W	GAL80	20385592	2010 Aug	Unstressed log-phase growth (control)	Positive	Indirect	Microarray analysis - wt vs TF mutant
YKL112W	ABF1	YML073C	RPL6A	20385592	2010 Aug	Unstressed log-phase growth (control)	Positive	Indirect	Microarray analysis - wt vs TF mutant
YKL112W	ABF1	YML079W	YML079W	20385592	2010 Aug	Unstressed log-phase growth (control)	Positive	Indirect	Microarray analysis - wt vs TF mutant
YKL112W	ABF1	YML081W	TDA9	15343339	2004 Sep 2	N/A	N/A	Direct	Chip-on-chip
YKL112W	ABF1	YML107C	PML39	16880382	2006 Aug 8	Carbon source quality/availability	Negative	Indirect	Microarray analysis (WT vs TF overexpression)
YKL112W	ABF1	YML107C	PML39	20385592	2010 Aug	Unstressed log-phase growth (control)	Negative	Indirect	Microarray analysis - wt vs TF mutant
YKL112W	ABF1	YML114C	TAF8	20385592	2010 Aug	Unstressed log-phase growth (control)	Negative	Indirect	Microarray analysis - wt vs TF mutant
YKL112W	ABF1	YMR005W	TAF4	15343339	2004 Sep 2	N/A	N/A	Direct	Chip-on-chip
YKL112W	ABF1	YMR008C	PLB1	20385592	2010 Aug	Unstressed log-phase growth (control)	Positive	Indirect	Microarray analysis - wt vs TF mutant
YKL112W	ABF1	YMR032W	HOF1	20385592	2010 Aug	Unstressed log-phase growth (control)	Negative	Indirect	Microarray analysis - wt vs TF mutant
YKL112W	ABF1	YMR033W	ARP9	15343339	2004 Sep 2	N/A	N/A	Direct	Chip-on-chip
YKL112W	ABF1	YMR033W	ARP9	16709784	2006 May 19	N/A	N/A	Direct	Chip-on-chip
YKL112W	ABF1	YMR039C	SUB1	20385592	2010 Aug	Unstressed log-phase growth (control)	Positive	Indirect	Microarray analysis - wt vs TF mutant
YKL112W	ABF1	YMR045C	YMR045C	20385592	2010 Aug	Unstressed log-phase growth (control)	Positive	Indirect	Microarray analysis - wt vs TF mutant
YKL112W	ABF1	YMR046W-A	Uncharacterized	20385592	2010 Aug	Unstressed log-phase growth (control)	Positive	Indirect	Microarray analysis - wt vs TF mutant
YKL112W	ABF1	YMR050C	YMR050C	20385592	2010 Aug	Unstressed log-phase growth (control)	Positive	Indirect	Microarray analysis - wt vs TF mutant
YKL112W	ABF1	YMR060C	SAM37	15343339	2004 Sep 2	N/A	N/A	Direct	Chip-on-chip
YKL112W	ABF1	YMR060C	SAM37	16709784	2006 May 19	N/A	N/A	Direct	Chip-on-chip
YKL112W	ABF1	YMR061W	RNA14	15343339	2004 Sep 2	N/A	N/A	Direct	Chip-on-chip
YKL112W	ABF1	YMR061W	RNA14	16709784	2006 May 19	N/A	N/A	Direct	Chip-on-chip
YKL112W	ABF1	YMR062C	ARG7	15192094	2004 Aug 13	Unstressed log-phase growth (control)	Positive	Indirect	Microarray analysis - wt vs TF mutant
YKL112W	ABF1	YMR078C	CTF18	16709784	2006 May 19	N/A	N/A	Direct	Chip-on-chip
YKL112W	ABF1	YMR079W	SEC14	16709784	2006 May 19	N/A	N/A	Direct	Chip-on-chip
YKL112W	ABF1	YMR083W	ADH3	20385592	2010 Aug	Unstressed log-phase growth (control)	Positive	Indirect	Microarray analysis - wt vs TF mutant
YKL112W	ABF1	YMR085W	YMR085W	20385592	2010 Aug	Unstressed log-phase growth (control)	Negative	Indirect	Microarray analysis - wt vs TF mutant
YKL112W	ABF1	YMR092C	AIP1	15343339	2004 Sep 2	N/A	N/A	Direct	Chip-on-chip
YKL112W	ABF1	YMR093W	UTP15	15343339	2004 Sep 2	N/A	N/A	Direct	Chip-on-chip
YKL112W	ABF1	YMR093W	UTP15	28158860	2017 May 5	Unstressed log-phase growth (control)	N/A	Direct	ChIP-seq
YKL112W	ABF1	YMR102C	YMR102C	20385592	2010 Aug	Unstressed log-phase growth (control)	Positive	Indirect	Microarray analysis - wt vs TF mutant
YKL112W	ABF1	YMR103C	YMR103C	20385592	2010 Aug	Unstressed log-phase growth (control)	Positive	Indirect	Microarray analysis - wt vs TF mutant
YKL112W	ABF1	YMR120C	ADE17	20385592	2010 Aug	Unstressed log-phase growth (control)	Positive	Indirect	Microarray analysis - wt vs TF mutant
YKL112W	ABF1	YMR129W	POM152	15343339	2004 Sep 2	N/A	N/A	Direct	Chip-on-chip
YKL112W	ABF1	YMR129W	POM152	16709784	2006 May 19	N/A	N/A	Direct	Chip-on-chip
YKL112W	ABF1	YMR152W	YIM1	20385592	2010 Aug	Unstressed log-phase growth (control)	Positive	Indirect	Microarray analysis - wt vs TF mutant
YKL112W	ABF1	YMR153W	NUP53	20385592	2010 Aug	Unstressed log-phase growth (control)	Positive	Indirect	Microarray analysis - wt vs TF mutant
YKL112W	ABF1	YMR157C	AIM36	20385592	2010 Aug	Unstressed log-phase growth (control)	Positive	Indirect	Microarray analysis - wt vs TF mutant
YKL112W	ABF1	YMR169C	ALD3	15192094	2004 Aug 13	Unstressed log-phase growth (control)	Negative	Indirect	Microarray analysis - wt vs TF mutant
YKL112W	ABF1	YMR169C	ALD3	16880382	2006 Aug 8	Carbon source quality/availability	Positive	Indirect	Microarray analysis (WT vs TF overexpression)
YKL112W	ABF1	YMR171C	EAR1	20385592	2010 Aug	Unstressed log-phase growth (control)	Negative	Indirect	Microarray analysis - wt vs TF mutant
YKL112W	ABF1	YMR197C	VTI1	15343339	2004 Sep 2	N/A	N/A	Direct	Chip-on-chip
YKL112W	ABF1	YMR198W	CIK1	15343339	2004 Sep 2	N/A	N/A	Direct	Chip-on-chip
YKL112W	ABF1	YMR200W	ROT1	15343339	2004 Sep 2	N/A	N/A	Direct	Chip-on-chip
YKL112W	ABF1	YMR201C	RAD14	20385592	2010 Aug	Unstressed log-phase growth (control)	Negative	Indirect	Microarray analysis - wt vs TF mutant
YKL112W	ABF1	YMR203W	TOM40	20385592	2010 Aug	Unstressed log-phase growth (control)	Positive	Indirect	Microarray analysis - wt vs TF mutant
YKL112W	ABF1	YMR208W	ERG12	20385592	2010 Aug	Unstressed log-phase growth (control)	Positive	Indirect	Microarray analysis - wt vs TF mutant
YKL112W	ABF1	YMR216C	SKY1	16709784	2006 May 19	N/A	N/A	Direct	Chip-on-chip
YKL112W	ABF1	YMR216C	SKY1	16880382	2006 Aug 8	Carbon source quality/availability	Negative	Indirect	Microarray analysis (WT vs TF overexpression)
YKL112W	ABF1	YMR217W	GUA1	16709784	2006 May 19	N/A	N/A	Direct	Chip-on-chip
YKL112W	ABF1	YMR217W	GUA1	28158860	2017 May 5	Unstressed log-phase growth (control)	N/A	Direct	ChIP-seq
YKL112W	ABF1	YMR228W	MTF1	20385592	2010 Aug	Unstressed log-phase growth (control)	Positive	Indirect	Microarray analysis - wt vs TF mutant
YKL112W	ABF1	YMR235C	RNA1	16709784	2006 May 19	N/A	N/A	Direct	Chip-on-chip
YKL112W	ABF1	YMR236W	TAF9	16709784	2006 May 19	N/A	N/A	Direct	Chip-on-chip
YKL112W	ABF1	YMR236W	TAF9	16880382	2006 Aug 8	Carbon source quality/availability	Negative	Indirect	Microarray analysis (WT vs TF overexpression)
YKL112W	ABF1	YMR243C	ZRC1	20385592	2010 Aug	Unstressed log-phase growth (control)	Positive	Indirect	Microarray analysis - wt vs TF mutant
YKL112W	ABF1	YMR260C	TIF11	15343339	2004 Sep 2	N/A	N/A	Direct	Chip-on-chip
YKL112W	ABF1	YMR260C	TIF11	16709784	2006 May 19	N/A	N/A	Direct	Chip-on-chip
YKL112W	ABF1	YMR260C	TIF11	28158860	2017 May 5	Unstressed log-phase growth (control)	N/A	Direct	ChIP-seq
YKL112W	ABF1	YMR296C	LCB1	15343339	2004 Sep 2	N/A	N/A	Direct	Chip-on-chip
YKL112W	ABF1	YMR297W	PRC1	15343339	2004 Sep 2	N/A	N/A	Direct	Chip-on-chip
YKL112W	ABF1	YMR297W	PRC1	20385592	2010 Aug	Unstressed log-phase growth (control)	Positive	Indirect	Microarray analysis - wt vs TF mutant
YKL112W	ABF1	YMR303C	ADH2	20385592	2010 Aug	Unstressed log-phase growth (control)	Positive	Indirect	Microarray analysis - wt vs TF mutant
YKL112W	ABF1	YMR307W	GAS1	20385592	2010 Aug	Unstressed log-phase growth (control)	Positive	Indirect	Microarray analysis - wt vs TF mutant
YKL112W	ABF1	YMR310C	YMR310C	17158163	2007	Stress	Positive	Indirect	Microarray analysis (WT vs TF mutant)
YKL112W	ABF1	YMR310C	YMR310C	28158860	2017 May 5	Unstressed log-phase growth (control)	N/A	Direct	ChIP-seq
YKL112W	ABF1	YMR315W	YMR315W	20385592	2010 Aug	Unstressed log-phase growth (control)	Positive	Indirect	Microarray analysis - wt vs TF mutant
YKL112W	ABF1	YMR316W	DIA1	20385592	2010 Aug	Unstressed log-phase growth (control)	Positive	Indirect	Microarray analysis - wt vs TF mutant
YKL112W	ABF1	YNL036W	NCE103	15343339	2004 Sep 2	N/A	N/A	Direct	Chip-on-chip
YKL112W	ABF1	YNL037C	IDH1	15343339	2004 Sep 2	N/A	N/A	Direct	Chip-on-chip
YKL112W	ABF1	YNL037C	IDH1	20385592	2010 Aug	Unstressed log-phase growth (control)	Positive	Indirect	Microarray analysis - wt vs TF mutant
YKL112W	ABF1	YNL043C	Uncharacterized	15192094	2004 Aug 13	Unstressed log-phase growth (control)	Positive	Indirect	Microarray analysis - wt vs TF mutant
YKL112W	ABF1	YNL044W	YIP3	15192094	2004 Aug 13	Unstressed log-phase growth (control)	Positive	Indirect	Microarray analysis - wt vs TF mutant
YKL112W	ABF1	YNL054W	VAC7	20385592	2010 Aug	Unstressed log-phase growth (control)	Positive	Indirect	Microarray analysis - wt vs TF mutant
YKL112W	ABF1	YNL055C	POR1	20385592	2010 Aug	Unstressed log-phase growth (control)	Positive	Indirect	Microarray analysis - wt vs TF mutant
YKL112W	ABF1	YNL057W	Uncharacterized	15343339	2004 Sep 2	N/A	N/A	Direct	Chip-on-chip
YKL112W	ABF1	YNL058C	YNL058C	20385592	2010 Aug	Unstressed log-phase growth (control)	Positive	Indirect	Microarray analysis - wt vs TF mutant
YKL112W	ABF1	YNL059C	ARP5	15192094	2004 Aug 13	Unstressed log-phase growth (control)	Positive	Indirect	Microarray analysis - wt vs TF mutant
YKL112W	ABF1	YNL059C	ARP5	15343339	2004 Sep 2	N/A	N/A	Direct	Chip-on-chip
YKL112W	ABF1	YNL061W	NOP2	20385592	2010 Aug	Unstressed log-phase growth (control)	Negative	Indirect	Microarray analysis - wt vs TF mutant
YKL112W	ABF1	YNL068C	FKH2	20385592	2010 Aug	Unstressed log-phase growth (control)	Negative	Indirect	Microarray analysis - wt vs TF mutant
YKL112W	ABF1	YNL071W	LAT1	20385592	2010 Aug	Unstressed log-phase growth (control)	Negative	Indirect	Microarray analysis - wt vs TF mutant
YKL112W	ABF1	YNL072W	RNH201	20385592	2010 Aug	Unstressed log-phase growth (control)	Negative	Indirect	Microarray analysis - wt vs TF mutant
YKL112W	ABF1	YNL073W	MSK1	20385592	2010 Aug	Unstressed log-phase growth (control)	Negative	Indirect	Microarray analysis - wt vs TF mutant
YKL112W	ABF1	YNL076W	MKS1	20385592	2010 Aug	Unstressed log-phase growth (control)	Negative	Indirect	Microarray analysis - wt vs TF mutant
YKL112W	ABF1	YNL081C	SWS2	15192094	2004 Aug 13	Unstressed log-phase growth (control)	Positive	Indirect	Microarray analysis - wt vs TF mutant
YKL112W	ABF1	YNL085W	MKT1	15343339	2004 Sep 2	N/A	N/A	Direct	Chip-on-chip
YKL112W	ABF1	YNL085W	MKT1	16709784	2006 May 19	N/A	N/A	Direct	Chip-on-chip
YKL112W	ABF1	YNL104C	LEU4	20385592	2010 Aug	Unstressed log-phase growth (control)	Positive	Indirect	Microarray analysis - wt vs TF mutant
YKL112W	ABF1	YNL110C	NOP15	20385592	2010 Aug	Unstressed log-phase growth (control)	Negative	Indirect	Microarray analysis - wt vs TF mutant
YKL112W	ABF1	YNL112W	DBP2	18305101	2008 May	Stress	Negative	Indirect	microarray
YKL112W	ABF1	YNL112W	DBP2	28158860	2017 May 5	Unstressed log-phase growth (control)	N/A	Direct	ChIP-seq
YKL112W	ABF1	YNL113W	RPC19	28158860	2017 May 5	Unstressed log-phase growth (control)	N/A	Direct	ChIP-seq
YKL112W	ABF1	YNL116W	DMA2	15343339	2004 Sep 2	N/A	N/A	Direct	Chip-on-chip
YKL112W	ABF1	YNL116W	DMA2	16709784	2006 May 19	N/A	N/A	Direct	Chip-on-chip
YKL112W	ABF1	YNL117W	MLS1	15343339	2004 Sep 2	N/A	N/A	Direct	Chip-on-chip
YKL112W	ABF1	YNL117W	MLS1	16709784	2006 May 19	N/A	N/A	Direct	Chip-on-chip
YKL112W	ABF1	YNL117W	MLS1	16880382	2006 Aug 8	Carbon source quality/availability	Positive	Indirect	Microarray analysis (WT vs TF overexpression)
YKL112W	ABF1	YNL118C	DCP2	15343339	2004 Sep 2	N/A	N/A	Direct	Chip-on-chip
YKL112W	ABF1	YNL118C	DCP2	16709784	2006 May 19	N/A	N/A	Direct	Chip-on-chip
YKL112W	ABF1	YNL119W	NCS2	15343339	2004 Sep 2	N/A	N/A	Direct	Chip-on-chip
YKL112W	ABF1	YNL119W	NCS2	16709784	2006 May 19	N/A	N/A	Direct	Chip-on-chip
YKL112W	ABF1	YNL121C	TOM70	15343339	2004 Sep 2	N/A	N/A	Direct	Chip-on-chip
YKL112W	ABF1	YNL121C	TOM70	16709784	2006 May 19	N/A	N/A	Direct	Chip-on-chip
YKL112W	ABF1	YNL145W	MFA2	16880382	2006 Aug 8	Carbon source quality/availability	Positive	Indirect	Microarray analysis (WT vs TF overexpression)
YKL112W	ABF1	YNL145W	MFA2	20385592	2010 Aug	Unstressed log-phase growth (control)	Positive	Indirect	Microarray analysis - wt vs TF mutant
YKL112W	ABF1	YNL146W	YNL146W	20385592	2010 Aug	Unstressed log-phase growth (control)	Positive	Indirect	Microarray analysis - wt vs TF mutant
YKL112W	ABF1	YNL149C	PGA2	15343339	2004 Sep 2	N/A	N/A	Direct	Chip-on-chip
YKL112W	ABF1	YNL149C	PGA2	16709784	2006 May 19	N/A	N/A	Direct	Chip-on-chip
YKL112W	ABF1	YNL149C	PGA2	17158163	2007	Stress	Positive	Indirect	Microarray analysis (WT vs TF mutant)
YKL112W	ABF1	YNL153C	GIM3	15192094	2004 Aug 13	Unstressed log-phase growth (control)	Positive	Indirect	Microarray analysis - wt vs TF mutant
YKL112W	ABF1	YNL170W	Uncharacterized	20385592	2010 Aug	Unstressed log-phase growth (control)	Positive	Indirect	Microarray analysis - wt vs TF mutant
YKL112W	ABF1	YNL183C	NPR1	15343339	2004 Sep 2	N/A	N/A	Direct	Chip-on-chip
YKL112W	ABF1	YNL189W	SRP1	15343339	2004 Sep 2	N/A	N/A	Direct	Chip-on-chip
YKL112W	ABF1	YNL212W	VID27	15343339	2004 Sep 2	N/A	N/A	Direct	Chip-on-chip
YKL112W	ABF1	YNL212W	VID27	25748434	2015 Mar 5	Stress	N/A	Direct	ChIP
YKL112W	ABF1	YNL213C	RRG9	15343339	2004 Sep 2	N/A	N/A	Direct	Chip-on-chip
YKL112W	ABF1	YNL227C	JJJ1	20385592	2010 Aug	Unstressed log-phase growth (control)	Negative	Indirect	Microarray analysis - wt vs TF mutant
YKL112W	ABF1	YNL243W	SLA2	15343339	2004 Sep 2	N/A	N/A	Direct	Chip-on-chip
YKL112W	ABF1	YNL244C	SUI1	15343339	2004 Sep 2	N/A	N/A	Direct	Chip-on-chip
YKL112W	ABF1	YNL253W	TEX1	20385592	2010 Aug	Unstressed log-phase growth (control)	Positive	Indirect	Microarray analysis - wt vs TF mutant
YKL112W	ABF1	YNL255C	GIS2	15343339	2004 Sep 2	N/A	N/A	Direct	Chip-on-chip
YKL112W	ABF1	YNL255C	GIS2	16880382	2006 Aug 8	Carbon source quality/availability	Negative	Indirect	Microarray analysis (WT vs TF overexpression)
YKL112W	ABF1	YNL258C	DSL1	15343339	2004 Sep 2	N/A	N/A	Direct	Chip-on-chip
YKL112W	ABF1	YNL258C	DSL1	16709784	2006 May 19	N/A	N/A	Direct	Chip-on-chip
YKL112W	ABF1	YNL264C	PDR17	20385592	2010 Aug	Unstressed log-phase growth (control)	Positive	Indirect	Microarray analysis - wt vs TF mutant
YKL112W	ABF1	YNL267W	PIK1	15343339	2004 Sep 2	N/A	N/A	Direct	Chip-on-chip
YKL112W	ABF1	YNL267W	PIK1	17158163	2007	Stress	Positive	Indirect	Microarray analysis (WT vs TF mutant)
YKL112W	ABF1	YNL267W	PIK1	25748434	2015 Mar 5	Stress	N/A	Direct	ChIP
YKL112W	ABF1	YNL283C	WSC2	20385592	2010 Aug	Unstressed log-phase growth (control)	Positive	Indirect	Microarray analysis - wt vs TF mutant
YKL112W	ABF1	YNL287W	SEC21	15343339	2004 Sep 2	N/A	N/A	Direct	Chip-on-chip
YKL112W	ABF1	YNL301C	RPL18B	18305101	2008 May	Stress	Negative	Indirect	microarray
YKL112W	ABF1	YNL301C	RPL18B	20385592	2010 Aug	Unstressed log-phase growth (control)	Positive	Indirect	Microarray analysis - wt vs TF mutant
YKL112W	ABF1	YNL306W	MRPS18	15343339	2004 Sep 2	N/A	N/A	Direct	Chip-on-chip
YKL112W	ABF1	YNL306W	MRPS18	16709784	2006 May 19	N/A	N/A	Direct	Chip-on-chip
YKL112W	ABF1	YNL306W	MRPS18	16880382	2006 Aug 8	Carbon source quality/availability	Negative	Indirect	Microarray analysis (WT vs TF overexpression)
YKL112W	ABF1	YNL307C	MCK1	15343339	2004 Sep 2	N/A	N/A	Direct	Chip-on-chip
YKL112W	ABF1	YNL307C	MCK1	16709784	2006 May 19	N/A	N/A	Direct	Chip-on-chip
YKL112W	ABF1	YNL312W	RFA2	15343339	2004 Sep 2	N/A	N/A	Direct	Chip-on-chip
YKL112W	ABF1	YNL312W	RFA2	16709784	2006 May 19	N/A	N/A	Direct	Chip-on-chip
YKL112W	ABF1	YNL313C	EMW1	15343339	2004 Sep 2	N/A	N/A	Direct	Chip-on-chip
YKL112W	ABF1	YNL313C	EMW1	16709784	2006 May 19	N/A	N/A	Direct	Chip-on-chip
YKL112W	ABF1	YNL321W	VNX1	15343339	2004 Sep 2	N/A	N/A	Direct	Chip-on-chip
YKL112W	ABF1	YNL322C	KRE1	15343339	2004 Sep 2	N/A	N/A	Direct	Chip-on-chip
YKL112W	ABF1	YNL322C	KRE1	20385592	2010 Aug	Unstressed log-phase growth (control)	Positive	Indirect	Microarray analysis - wt vs TF mutant
YKL112W	ABF1	YNL336W	COS1	20385592	2010 Aug	Unstressed log-phase growth (control)	Positive	Indirect	Microarray analysis - wt vs TF mutant
YKL112W	ABF1	YNL338W	Uncharacterized	20385592	2010 Aug	Unstressed log-phase growth (control)	Negative	Indirect	Microarray analysis - wt vs TF mutant
YKL112W	ABF1	YNL339C	YRF1-6	20385592	2010 Aug	Unstressed log-phase growth (control)	Positive	Indirect	Microarray analysis - wt vs TF mutant
YKL112W	ABF1	YNR017W	TIM23	20385592	2010 Aug	Unstressed log-phase growth (control)	Positive	Indirect	Microarray analysis - wt vs TF mutant
YKL112W	ABF1	YNR018W	RCF2	20385592	2010 Aug	Unstressed log-phase growth (control)	Positive	Indirect	Microarray analysis - wt vs TF mutant
YKL112W	ABF1	YNR021W	YNR021W	20385592	2010 Aug	Unstressed log-phase growth (control)	Positive	Indirect	Microarray analysis - wt vs TF mutant
YKL112W	ABF1	YNR032W	PPG1	20385592	2010 Aug	Unstressed log-phase growth (control)	Positive	Indirect	Microarray analysis - wt vs TF mutant
YKL112W	ABF1	YNR036C	MRPS12	16709784	2006 May 19	N/A	N/A	Direct	Chip-on-chip
YKL112W	ABF1	YNR037C	RSM19	15343339	2004 Sep 2	N/A	N/A	Direct	Chip-on-chip
YKL112W	ABF1	YNR037C	RSM19	16709784	2006 May 19	N/A	N/A	Direct	Chip-on-chip
YKL112W	ABF1	YNR037C	RSM19	16880382	2006 Aug 8	Carbon source quality/availability	Negative	Indirect	Microarray analysis (WT vs TF overexpression)
YKL112W	ABF1	YNR038W	DBP6	15343339	2004 Sep 2	N/A	N/A	Direct	Chip-on-chip
YKL112W	ABF1	YNR038W	DBP6	16709784	2006 May 19	N/A	N/A	Direct	Chip-on-chip
YKL112W	ABF1	YNR038W	DBP6	28158860	2017 May 5	Unstressed log-phase growth (control)	N/A	Direct	ChIP-seq
YKL112W	ABF1	YNR044W	AGA1	16880382	2006 Aug 8	Carbon source quality/availability	Positive	Indirect	Microarray analysis (WT vs TF overexpression)
YKL112W	ABF1	YNR044W	AGA1	20385592	2010 Aug	Unstressed log-phase growth (control)	Positive	Indirect	Microarray analysis - wt vs TF mutant
YKL112W	ABF1	YNR046W	TRM112	15343339	2004 Sep 2	N/A	N/A	Direct	Chip-on-chip
YKL112W	ABF1	YNR046W	TRM112	16709784	2006 May 19	N/A	N/A	Direct	Chip-on-chip
YKL112W	ABF1	YNR053C	NOG2	16709784	2006 May 19	N/A	N/A	Direct	Chip-on-chip
YKL112W	ABF1	YNR053C	NOG2	28158860	2017 May 5	Unstressed log-phase growth (control)	N/A	Direct	ChIP-seq
YKL112W	ABF1	YNR071C	YNR071C	20385592	2010 Aug	Unstressed log-phase growth (control)	Negative	Indirect	Microarray analysis - wt vs TF mutant
YKL112W	ABF1	YOL004W	SIN3	20385592	2010 Aug	Unstressed log-phase growth (control)	Negative	Indirect	Microarray analysis - wt vs TF mutant
YKL112W	ABF1	YOL013W-A	YOL013W-A	20385592	2010 Aug	Unstressed log-phase growth (control)	Positive	Indirect	Microarray analysis - wt vs TF mutant
YKL112W	ABF1	YOL014W	YOL014W	15192094	2004 Aug 13	Unstressed log-phase growth (control)	Positive	Indirect	Microarray analysis - wt vs TF mutant
YKL112W	ABF1	YOL014W	YOL014W	16880382	2006 Aug 8	Carbon source quality/availability	Positive	Indirect	Microarray analysis (WT vs TF overexpression)
YKL112W	ABF1	YOL014W	YOL014W	20385592	2010 Aug	Unstressed log-phase growth (control)	Positive	Indirect	Microarray analysis - wt vs TF mutant
YKL112W	ABF1	YOL017W	ESC8	20385592	2010 Aug	Unstressed log-phase growth (control)	Negative	Indirect	Microarray analysis - wt vs TF mutant
YKL112W	ABF1	YOL025W	LAG2	20385592	2010 Aug	Unstressed log-phase growth (control)	Negative	Indirect	Microarray analysis - wt vs TF mutant
YKL112W	ABF1	YOL026C	MIM1	15192094	2004 Aug 13	Unstressed log-phase growth (control)	Positive	Indirect	Microarray analysis - wt vs TF mutant
YKL112W	ABF1	YOL026C	MIM1	16880382	2006 Aug 8	Carbon source quality/availability	Negative	Indirect	Microarray analysis (WT vs TF overexpression)
YKL112W	ABF1	YOL030W	GAS5	20385592	2010 Aug	Unstressed log-phase growth (control)	Positive	Indirect	Microarray analysis - wt vs TF mutant
YKL112W	ABF1	YOL036W	YOL036W	15343339	2004 Sep 2	N/A	N/A	Direct	Chip-on-chip
YKL112W	ABF1	YOL036W	YOL036W	16709784	2006 May 19	N/A	N/A	Direct	Chip-on-chip
YKL112W	ABF1	YOL041C	NOP12	18305101	2008 May	Stress	Negative	Indirect	microarray
YKL112W	ABF1	YOL041C	NOP12	20385592	2010 Aug	Unstressed log-phase growth (control)	Negative	Indirect	Microarray analysis - wt vs TF mutant
YKL112W	ABF1	YOL041C	NOP12	28158860	2017 May 5	Unstressed log-phase growth (control)	N/A	Direct	ChIP
YKL112W	ABF1	YOL041C	NOP12	28158860	2017 May 5	Unstressed log-phase growth (control)	N/A	Direct	ChIP-seq
YKL112W	ABF1	YOL041C	NOP12	28158860	2017 May 5	Unstressed log-phase growth (control)	Positive	Indirect	RT-PCR - wt vs TFBS mutant
YKL112W	ABF1	YOL046C	Uncharacterized	20385592	2010 Aug	Unstressed log-phase growth (control)	Negative	Indirect	Microarray analysis - wt vs TF mutant
YKL112W	ABF1	YOL058W	ARG1	12024015	2002 Jun	Unstressed log-phase growth (control)	Positive	Indirect	lacZ - wt vs. Mutant promoter region
YKL112W	ABF1	YOL068C	HST1	15343339	2004 Sep 2	N/A	N/A	Direct	Chip-on-chip
YKL112W	ABF1	YOL068C	HST1	16709784	2006 May 19	N/A	N/A	Direct	Chip-on-chip
YKL112W	ABF1	YOL072W	THP1	20385592	2010 Aug	Unstressed log-phase growth (control)	Negative	Indirect	Microarray analysis - wt vs TF mutant
YKL112W	ABF1	YOL076W	MDM20	15343339	2004 Sep 2	N/A	N/A	Direct	Chip-on-chip
YKL112W	ABF1	YOL076W	MDM20	16709784	2006 May 19	N/A	N/A	Direct	Chip-on-chip
YKL112W	ABF1	YOL077C	BRX1	15343339	2004 Sep 2	N/A	N/A	Direct	Chip-on-chip
YKL112W	ABF1	YOL077C	BRX1	16709784	2006 May 19	N/A	N/A	Direct	Chip-on-chip
YKL112W	ABF1	YOL077C	BRX1	28158860	2017 May 5	Unstressed log-phase growth (control)	N/A	Direct	ChIP-seq
YKL112W	ABF1	YOL079W	Uncharacterized	20385592	2010 Aug	Unstressed log-phase growth (control)	Negative	Indirect	Microarray analysis - wt vs TF mutant
YKL112W	ABF1	YOL080C	REX4	20385592	2010 Aug	Unstressed log-phase growth (control)	Negative	Indirect	Microarray analysis - wt vs TF mutant
YKL112W	ABF1	YOL086C	ADH1	7663308	1995 Sep	Unstressed log-phase growth (control)	Positive	Indirect	lacZ - wt vs. Mutant promoter region
YKL112W	ABF1	YOL086C	ADH1	20385592	2010 Aug	Unstressed log-phase growth (control)	Positive	Indirect	Microarray analysis - wt vs TF mutant
YKL112W	ABF1	YOL092W	YPQ1	20385592	2010 Aug	Unstressed log-phase growth (control)	Positive	Indirect	Microarray analysis - wt vs TF mutant
YKL112W	ABF1	YOL098C	SDD3	20385592	2010 Aug	Unstressed log-phase growth (control)	Negative	Indirect	Microarray analysis - wt vs TF mutant
YKL112W	ABF1	YOL103W-B	YOL103W-B	20385592	2010 Aug	Unstressed log-phase growth (control)	Positive	Indirect	Microarray analysis - wt vs TF mutant
YKL112W	ABF1	YOL104C	NDJ1	20385592	2010 Aug	Unstressed log-phase growth (control)	Positive	Indirect	Microarray analysis - wt vs TF mutant
YKL112W	ABF1	YOL106W	Uncharacterized	20385592	2010 Aug	Unstressed log-phase growth (control)	Positive	Indirect	Microarray analysis - wt vs TF mutant
YKL112W	ABF1	YOL111C	MDY2	20385592	2010 Aug	Unstressed log-phase growth (control)	Positive	Indirect	Microarray analysis - wt vs TF mutant
YKL112W	ABF1	YOL116W	MSN1	15343339	2004 Sep 2	N/A	N/A	Direct	Chip-on-chip
YKL112W	ABF1	YOL116W	MSN1	16709784	2006 May 19	N/A	N/A	Direct	Chip-on-chip
YKL112W	ABF1	YOL119C	MCH4	20385592	2010 Aug	Unstressed log-phase growth (control)	Positive	Indirect	Microarray analysis - wt vs TF mutant
YKL112W	ABF1	YOL130W	ALR1	16880382	2006 Aug 8	Carbon source quality/availability	Positive	Indirect	Microarray analysis (WT vs TF overexpression)
YKL112W	ABF1	YOL130W	ALR1	20385592	2010 Aug	Unstressed log-phase growth (control)	Negative	Indirect	Microarray analysis - wt vs TF mutant
YKL112W	ABF1	YOL138C	RTC1	20385592	2010 Aug	Unstressed log-phase growth (control)	Negative	Indirect	Microarray analysis - wt vs TF mutant
YKL112W	ABF1	YOL141W	PPM2	20385592	2010 Aug	Unstressed log-phase growth (control)	Negative	Indirect	Microarray analysis - wt vs TF mutant
YKL112W	ABF1	YOL152W	FRE7	16880382	2006 Aug 8	Carbon source quality/availability	Positive	Indirect	Microarray analysis (WT vs TF overexpression)
YKL112W	ABF1	YOL152W	FRE7	20385592	2010 Aug	Unstressed log-phase growth (control)	Positive	Indirect	Microarray analysis - wt vs TF mutant
YKL112W	ABF1	YOL165C	AAD15	20385592	2010 Aug	Unstressed log-phase growth (control)	Positive	Indirect	Microarray analysis - wt vs TF mutant
YKL112W	ABF1	YOR010C	TIR2	16880382	2006 Aug 8	Carbon source quality/availability	Positive	Indirect	Microarray analysis (WT vs TF overexpression)
YKL112W	ABF1	YOR010C	TIR2	20385592	2010 Aug	Unstressed log-phase growth (control)	Positive	Indirect	Microarray analysis - wt vs TF mutant
YKL112W	ABF1	YOR027W	STI1	16709784	2006 May 19	N/A	N/A	Direct	Chip-on-chip
YKL112W	ABF1	YOR027W	STI1	16880382	2006 Aug 8	Carbon source quality/availability	Positive	Indirect	Microarray analysis (WT vs TF overexpression)
YKL112W	ABF1	YOR027W	STI1	20385592	2010 Aug	Unstressed log-phase growth (control)	Positive	Indirect	Microarray analysis - wt vs TF mutant
YKL112W	ABF1	YOR045W	TOM6	15343339	2004 Sep 2	N/A	N/A	Direct	Chip-on-chip
YKL112W	ABF1	YOR045W	TOM6	16880382	2006 Aug 8	Carbon source quality/availability	Negative	Indirect	Microarray analysis (WT vs TF overexpression)
YKL112W	ABF1	YOR056C	NOB1	15343339	2004 Sep 2	N/A	N/A	Direct	Chip-on-chip
YKL112W	ABF1	YOR056C	NOB1	20385592	2010 Aug	Unstressed log-phase growth (control)	Negative	Indirect	Microarray analysis - wt vs TF mutant
YKL112W	ABF1	YOR056C	NOB1	28158860	2017 May 5	Unstressed log-phase growth (control)	N/A	Direct	ChIP-seq
YKL112W	ABF1	YOR057W	SGT1	15343339	2004 Sep 2	N/A	N/A	Direct	Chip-on-chip
YKL112W	ABF1	YOR058C	ASE1	20385592	2010 Aug	Unstressed log-phase growth (control)	Negative	Indirect	Microarray analysis - wt vs TF mutant
YKL112W	ABF1	YOR063W	RPL3	3054514	1988 Oct	Unstressed log-phase growth (control)	Positive	Indirect	lacZ - wt vs. Mutant promoter region
YKL112W	ABF1	YOR063W	RPL3	9677425	1998 Jul 31	Unstressed log-phase growth (control)	N/A	Direct	DNA footprinting
YKL112W	ABF1	YOR063W	RPL3	25748434	2015 Mar 5	Stress	N/A	Direct	ChIP
YKL112W	ABF1	YOR063W	RPL3	27016735	2016 Jul 27	Unstressed log-phase growth (control)	N/A	Direct	ChIP
YKL112W	ABF1	YOR078W	BUD21	20385592	2010 Aug	Unstressed log-phase growth (control)	Negative	Indirect	Microarray analysis - wt vs TF mutant
YKL112W	ABF1	YOR078W	BUD21	28158860	2017 May 5	Unstressed log-phase growth (control)	N/A	Direct	ChIP-seq
YKL112W	ABF1	YOR085W	OST3	20385592	2010 Aug	Unstressed log-phase growth (control)	Positive	Indirect	Microarray analysis - wt vs TF mutant
YKL112W	ABF1	YOR116C	RPO31	15343339	2004 Sep 2	N/A	N/A	Direct	Chip-on-chip
YKL112W	ABF1	YOR116C	RPO31	28158860	2017 May 5	Unstressed log-phase growth (control)	N/A	Direct	ChIP-seq
YKL112W	ABF1	YOR117W	RPT5	15343339	2004 Sep 2	N/A	N/A	Direct	Chip-on-chip
YKL112W	ABF1	YOR135C	Uncharacterized	20385592	2010 Aug	Unstressed log-phase growth (control)	Negative	Indirect	Microarray analysis - wt vs TF mutant
YKL112W	ABF1	YOR142W-B	YOR142W-B	20385592	2010 Aug	Unstressed log-phase growth (control)	Positive	Indirect	Microarray analysis - wt vs TF mutant
YKL112W	ABF1	YOR145C	PNO1	28158860	2017 May 5	Unstressed log-phase growth (control)	N/A	Direct	ChIP-seq
YKL112W	ABF1	YOR151C	RPB2	8948647	1996 Nov 15	Unstressed log-phase growth (control)	Positive	Indirect	LacZ - wt vs TF mutant
YKL112W	ABF1	YOR167C	RPS28A	2677998	1989 Sep 25	N/A	N/A	Direct	DNA footprinting
YKL112W	ABF1	YOR167C	RPS28A	10684934	2000 Mar 15	Unstressed log-phase growth (control)	N/A	Direct	DNA footprinting
YKL112W	ABF1	YOR167C	RPS28A	25748434	2015 Mar 5	Stress	N/A	Direct	ChIP
YKL112W	ABF1	YOR167C	RPS28A	27016735	2016 Jul 27	Unstressed log-phase growth (control)	N/A	Direct	ChIP
YKL112W	ABF1	YOR168W	GLN4	28158860	2017 May 5	Unstressed log-phase growth (control)	N/A	Direct	ChIP-seq
YKL112W	ABF1	YOR192C-B	YOR192C-B	20385592	2010 Aug	Unstressed log-phase growth (control)	Positive	Indirect	Microarray analysis - wt vs TF mutant
YKL112W	ABF1	YOR194C	TOA1	20385592	2010 Aug	Unstressed log-phase growth (control)	Negative	Indirect	Microarray analysis - wt vs TF mutant
YKL112W	ABF1	YOR204W	DED1	2406570	1990 Mar	In vitro	N/A	Direct	EMSA
YKL112W	ABF1	YOR204W	DED1	8195216	1994 Jun 3	In vitro	N/A	Direct	EMSA
YKL112W	ABF1	YOR205C	GEP3	15343339	2004 Sep 2	N/A	N/A	Direct	Chip-on-chip
YKL112W	ABF1	YOR205C	GEP3	16709784	2006 May 19	N/A	N/A	Direct	Chip-on-chip
YKL112W	ABF1	YOR206W	NOC2	15343339	2004 Sep 2	N/A	N/A	Direct	Chip-on-chip
YKL112W	ABF1	YOR206W	NOC2	16709784	2006 May 19	N/A	N/A	Direct	Chip-on-chip
YKL112W	ABF1	YOR207C	RET1	28158860	2017 May 5	Unstressed log-phase growth (control)	N/A	Direct	ChIP-seq
YKL112W	ABF1	YOR224C	RPB8	16709784	2006 May 19	N/A	N/A	Direct	Chip-on-chip
YKL112W	ABF1	YOR224C	RPB8	28158860	2017 May 5	Unstressed log-phase growth (control)	N/A	Direct	ChIP-seq
YKL112W	ABF1	YOR226C	ISU2	20385592	2010 Aug	Unstressed log-phase growth (control)	Positive	Indirect	Microarray analysis - wt vs TF mutant
YKL112W	ABF1	YOR230W	WTM1	20385592	2010 Aug	Unstressed log-phase growth (control)	Positive	Indirect	Microarray analysis - wt vs TF mutant
YKL112W	ABF1	YOR232W	MGE1	15192094	2004 Aug 13	Unstressed log-phase growth (control)	Positive	Indirect	Microarray analysis - wt vs TF mutant
YKL112W	ABF1	YOR236W	DFR1	15192094	2004 Aug 13	Unstressed log-phase growth (control)	Positive	Indirect	Microarray analysis - wt vs TF mutant
YKL112W	ABF1	YOR247W	SRL1	20385592	2010 Aug	Unstressed log-phase growth (control)	Positive	Indirect	Microarray analysis - wt vs TF mutant
YKL112W	ABF1	YOR251C	TUM1	20385592	2010 Aug	Unstressed log-phase growth (control)	Positive	Indirect	Microarray analysis - wt vs TF mutant
YKL112W	ABF1	YOR259C	RPT4	20385592	2010 Aug	Unstressed log-phase growth (control)	Negative	Indirect	Microarray analysis - wt vs TF mutant
YKL112W	ABF1	YOR261C	RPN8	15343339	2004 Sep 2	N/A	N/A	Direct	Chip-on-chip
YKL112W	ABF1	YOR261C	RPN8	16709784	2006 May 19	N/A	N/A	Direct	Chip-on-chip
YKL112W	ABF1	YOR261C	RPN8	25748434	2015 Mar 5	Stress	N/A	Direct	ChIP
YKL112W	ABF1	YOR262W	GPN2	15343339	2004 Sep 2	N/A	N/A	Direct	Chip-on-chip
YKL112W	ABF1	YOR262W	GPN2	16709784	2006 May 19	N/A	N/A	Direct	Chip-on-chip
YKL112W	ABF1	YOR262W	GPN2	16880382	2006 Aug 8	Carbon source quality/availability	Negative	Indirect	Microarray analysis (WT vs TF overexpression)
YKL112W	ABF1	YOR289W	YOR289W	15192094	2004 Aug 13	Unstressed log-phase growth (control)	Negative	Indirect	Microarray analysis - wt vs TF mutant
YKL112W	ABF1	YOR297C	TIM18	20385592	2010 Aug	Unstressed log-phase growth (control)	Positive	Indirect	Microarray analysis - wt vs TF mutant
YKL112W	ABF1	YOR309C	Uncharacterized	15343339	2004 Sep 2	N/A	N/A	Direct	Chip-on-chip
YKL112W	ABF1	YOR310C	NOP58	15343339	2004 Sep 2	N/A	N/A	Direct	Chip-on-chip
YKL112W	ABF1	YOR323C	PRO2	20385592	2010 Aug	Unstressed log-phase growth (control)	Positive	Indirect	Microarray analysis - wt vs TF mutant
YKL112W	ABF1	YOR331C	Uncharacterized	20385592	2010 Aug	Unstressed log-phase growth (control)	Positive	Indirect	Microarray analysis - wt vs TF mutant
YKL112W	ABF1	YOR332W	VMA4	20385592	2010 Aug	Unstressed log-phase growth (control)	Positive	Indirect	Microarray analysis - wt vs TF mutant
YKL112W	ABF1	YOR343W-B	YOR343W-B	20385592	2010 Aug	Unstressed log-phase growth (control)	Positive	Indirect	Microarray analysis - wt vs TF mutant
YKL112W	ABF1	YOR348C	PUT4	15192094	2004 Aug 13	Unstressed log-phase growth (control)	Negative	Indirect	Microarray analysis - wt vs TF mutant
YKL112W	ABF1	YOR357C	SNX3	15192094	2004 Aug 13	Unstressed log-phase growth (control)	Positive	Indirect	Microarray analysis - wt vs TF mutant
YKL112W	ABF1	YOR363C	PIP2	12748191	2003 Jul 25	Carbon source quality/availability	Positive	Indirect	lacZ - wt vs. TF mutant
YKL112W	ABF1	YOR363C	PIP2	16880382	2006 Aug 8	Carbon source quality/availability	Positive	Indirect	Microarray analysis (WT vs TF overexpression)
YKL112W	ABF1	YOR374W	ALD4	20385592	2010 Aug	Unstressed log-phase growth (control)	Positive	Indirect	Microarray analysis - wt vs TF mutant
YKL112W	ABF1	YOR385W	YOR385W	20385592	2010 Aug	Unstressed log-phase growth (control)	Positive	Indirect	Microarray analysis - wt vs TF mutant
YKL112W	ABF1	YOR391C	HSP33	20385592	2010 Aug	Unstressed log-phase growth (control)	Negative	Indirect	Microarray analysis - wt vs TF mutant
YKL112W	ABF1	YPL004C	LSP1	20385592	2010 Aug	Unstressed log-phase growth (control)	Positive	Indirect	Microarray analysis - wt vs TF mutant
YKL112W	ABF1	YPL012W	RRP12	15343339	2004 Sep 2	N/A	N/A	Direct	Chip-on-chip
YKL112W	ABF1	YPL012W	RRP12	28158860	2017 May 5	Unstressed log-phase growth (control)	N/A	Direct	ChIP-seq
YKL112W	ABF1	YPL013C	MRPS16	15343339	2004 Sep 2	N/A	N/A	Direct	Chip-on-chip
YKL112W	ABF1	YPL018W	CTF19	17158163	2007	Stress	Negative	Indirect	Microarray analysis (WT vs TF mutant)
YKL112W	ABF1	YPL018W	CTF19	20385592	2010 Aug	Unstressed log-phase growth (control)	Negative	Indirect	Microarray analysis - wt vs TF mutant
YKL112W	ABF1	YPL036W	PMA2	15343339	2004 Sep 2	N/A	N/A	Direct	Chip-on-chip
YKL112W	ABF1	YPL037C	EGD1	15343339	2004 Sep 2	N/A	N/A	Direct	Chip-on-chip
YKL112W	ABF1	YPL043W	NOP4	20385592	2010 Aug	Unstressed log-phase growth (control)	Negative	Indirect	Microarray analysis - wt vs TF mutant
YKL112W	ABF1	YPL044C	Uncharacterized	20385592	2010 Aug	Unstressed log-phase growth (control)	Negative	Indirect	Microarray analysis - wt vs TF mutant
YKL112W	ABF1	YPL048W	CAM1	20385592	2010 Aug	Unstressed log-phase growth (control)	Positive	Indirect	Microarray analysis - wt vs TF mutant
YKL112W	ABF1	YPL050C	MNN9	20385592	2010 Aug	Unstressed log-phase growth (control)	Positive	Indirect	Microarray analysis - wt vs TF mutant
YKL112W	ABF1	YPL059W	GRX5	20385592	2010 Aug	Unstressed log-phase growth (control)	Positive	Indirect	Microarray analysis - wt vs TF mutant
YKL112W	ABF1	YPL087W	YDC1	20385592	2010 Aug	Unstressed log-phase growth (control)	Positive	Indirect	Microarray analysis - wt vs TF mutant
YKL112W	ABF1	YPL090C	RPS6A	20385592	2010 Aug	Unstressed log-phase growth (control)	Negative	Indirect	Microarray analysis - wt vs TF mutant
YKL112W	ABF1	YPL092W	SSU1	20385592	2010 Aug	Unstressed log-phase growth (control)	Positive	Indirect	Microarray analysis - wt vs TF mutant
YKL112W	ABF1	YPL111W	CAR1	1917865	1991 Oct	In vitro	N/A	Direct	EMSA
YKL112W	ABF1	YPL111W	CAR1	9065690	1997 Feb 20	Unstressed log-phase growth (control)	Positive	Indirect	Enzyme activity -WT vs. mutant promoter region
YKL112W	ABF1	YPL129W	TAF14	20385592	2010 Aug	Unstressed log-phase growth (control)	Positive	Indirect	Microarray analysis - wt vs TF mutant
YKL112W	ABF1	YPL131W	RPL5	15192094	2004 Aug 13	Unstressed log-phase growth (control)	Positive	Indirect	Microarray analysis - wt vs TF mutant
YKL112W	ABF1	YPL131W	RPL5	20385592	2010 Aug	Unstressed log-phase growth (control)	Positive	Indirect	Microarray analysis - wt vs TF mutant
YKL112W	ABF1	YPL136W	Uncharacterized	20385592	2010 Aug	Unstressed log-phase growth (control)	Negative	Indirect	Microarray analysis - wt vs TF mutant
YKL112W	ABF1	YPL145C	KES1	20385592	2010 Aug	Unstressed log-phase growth (control)	Positive	Indirect	Microarray analysis - wt vs TF mutant
YKL112W	ABF1	YPL156C	PRM4	20385592	2010 Aug	Unstressed log-phase growth (control)	Positive	Indirect	Microarray analysis - wt vs TF mutant
YKL112W	ABF1	YPL159C	PET20	15343339	2004 Sep 2	N/A	N/A	Direct	Chip-on-chip
YKL112W	ABF1	YPL160W	CDC60	28158860	2017 May 5	Unstressed log-phase growth (control)	N/A	Direct	ChIP-seq
YKL112W	ABF1	YPL209C	IPL1	20385592	2010 Aug	Unstressed log-phase growth (control)	Negative	Indirect	Microarray analysis - wt vs TF mutant
YKL112W	ABF1	YPL217C	BMS1	20385592	2010 Aug	Unstressed log-phase growth (control)	Negative	Indirect	Microarray analysis - wt vs TF mutant
YKL112W	ABF1	YPL218W	SAR1	20385592	2010 Aug	Unstressed log-phase growth (control)	Positive	Indirect	Microarray analysis - wt vs TF mutant
YKL112W	ABF1	YPL228W	CET1	15343339	2004 Sep 2	N/A	N/A	Direct	Chip-on-chip
YKL112W	ABF1	YPL232W	SSO1	15343339	2004 Sep 2	N/A	N/A	Direct	Chip-on-chip
YKL112W	ABF1	YPL242C	IQG1	15343339	2004 Sep 2	N/A	N/A	Direct	Chip-on-chip
YKL112W	ABF1	YPL242C	IQG1	16709784	2006 May 19	N/A	N/A	Direct	Chip-on-chip
YKL112W	ABF1	YPL254W	HFI1	20385592	2010 Aug	Unstressed log-phase growth (control)	Negative	Indirect	Microarray analysis - wt vs TF mutant
YKL112W	ABF1	YPL257W-B	YPL257W-B	20385592	2010 Aug	Unstressed log-phase growth (control)	Positive	Indirect	Microarray analysis - wt vs TF mutant
YKL112W	ABF1	YPL272C	PBI1	20385592	2010 Aug	Unstressed log-phase growth (control)	Negative	Indirect	Microarray analysis - wt vs TF mutant
YKL112W	ABF1	YPL274W	SAM3	20385592	2010 Aug	Unstressed log-phase growth (control)	Positive	Indirect	Microarray analysis - wt vs TF mutant
YKL112W	ABF1	YPL276W	YPL276W	20385592	2010 Aug	Unstressed log-phase growth (control)	Negative	Indirect	Microarray analysis - wt vs TF mutant
YKL112W	ABF1	YPR002C-A	Uncharacterized	20385592	2010 Aug	Unstressed log-phase growth (control)	Positive	Indirect	Microarray analysis - wt vs TF mutant
YKL112W	ABF1	YPR004C	AIM45	20385592	2010 Aug	Unstressed log-phase growth (control)	Positive	Indirect	Microarray analysis - wt vs TF mutant
YKL112W	ABF1	YPR016C	TIF6	28158860	2017 May 5	Unstressed log-phase growth (control)	N/A	Direct	ChIP-seq
YKL112W	ABF1	YPR017C	DSS4	15192094	2004 Aug 13	Unstressed log-phase growth (control)	Positive	Indirect	Microarray analysis - wt vs TF mutant
YKL112W	ABF1	YPR017C	DSS4	15343339	2004 Sep 2	N/A	N/A	Direct	Chip-on-chip
YKL112W	ABF1	YPR018W	RLF2	15343339	2004 Sep 2	N/A	N/A	Direct	Chip-on-chip
YKL112W	ABF1	YPR018W	RLF2	16880382	2006 Aug 8	Carbon source quality/availability	Positive	Indirect	Microarray analysis (WT vs TF overexpression)
YKL112W	ABF1	YPR019W	MCM4	20385592	2010 Aug	Unstressed log-phase growth (control)	Negative	Indirect	Microarray analysis - wt vs TF mutant
YKL112W	ABF1	YPR028W	YOP1	20385592	2010 Aug	Unstressed log-phase growth (control)	Positive	Indirect	Microarray analysis - wt vs TF mutant
YKL112W	ABF1	YPR033C	HTS1	28158860	2017 May 5	Unstressed log-phase growth (control)	N/A	Direct	ChIP-seq
YKL112W	ABF1	YPR035W	GLN1	28158860	2017 May 5	Unstressed log-phase growth (control)	N/A	Direct	ChIP-seq
YKL112W	ABF1	YPR036W	VMA13	20385592	2010 Aug	Unstressed log-phase growth (control)	Positive	Indirect	Microarray analysis - wt vs TF mutant
YKL112W	ABF1	YPR045C	THP3	16709784	2006 May 19	N/A	N/A	Direct	Chip-on-chip
YKL112W	ABF1	YPR045C	THP3	20385592	2010 Aug	Unstressed log-phase growth (control)	Negative	Indirect	Microarray analysis - wt vs TF mutant
YKL112W	ABF1	YPR046W	MCM16	16709784	2006 May 19	N/A	N/A	Direct	Chip-on-chip
YKL112W	ABF1	YPR054W	SMK1	9742114	1998 Oct	Cell cycle/morphology	Positive	Indirect	Northern - wt vs. Mutant promoter region
YKL112W	ABF1	YPR061C	JID1	20385592	2010 Aug	Unstressed log-phase growth (control)	Negative	Indirect	Microarray analysis - wt vs TF mutant
YKL112W	ABF1	YPR077C	Uncharacterized	15192094	2004 Aug 13	Unstressed log-phase growth (control)	Negative	Indirect	Microarray analysis - wt vs TF mutant
YKL112W	ABF1	YPR092W	Uncharacterized	20385592	2010 Aug	Unstressed log-phase growth (control)	Positive	Indirect	Microarray analysis - wt vs TF mutant
YKL112W	ABF1	YPR104C	FHL1	15343339	2004 Sep 2	N/A	N/A	Direct	Chip-on-chip
YKL112W	ABF1	YPR110C	RPC40	28158860	2017 May 5	Unstressed log-phase growth (control)	N/A	Direct	ChIP-seq
YKL112W	ABF1	YPR128C	ANT1	15343339	2004 Sep 2	N/A	N/A	Direct	Chip-on-chip
YKL112W	ABF1	YPR129W	SCD6	15343339	2004 Sep 2	N/A	N/A	Direct	Chip-on-chip
YKL112W	ABF1	YPR137W	RRP9	28158860	2017 May 5	Unstressed log-phase growth (control)	N/A	Direct	ChIP-seq
YKL112W	ABF1	YPR148C	YPR148C	15192094	2004 Aug 13	Unstressed log-phase growth (control)	Positive	Indirect	Microarray analysis - wt vs TF mutant
YKL112W	ABF1	YPR148C	YPR148C	17158163	2007	Stress	Positive	Indirect	Microarray analysis (WT vs TF mutant)
YKL112W	ABF1	YPR157W	TDA6	15192094	2004 Aug 13	Unstressed log-phase growth (control)	Negative	Indirect	Microarray analysis - wt vs TF mutant
YKL112W	ABF1	YPR172W	YPR172W	15192094	2004 Aug 13	Unstressed log-phase growth (control)	Positive	Indirect	Microarray analysis - wt vs TF mutant
YKL112W	ABF1	YPR176C	BET2	15343339	2004 Sep 2	N/A	N/A	Direct	Chip-on-chip
YKL112W	ABF1	YPR176C	BET2	16709784	2006 May 19	N/A	N/A	Direct	Chip-on-chip
YKL112W	ABF1	YPR176C	BET2	16880382	2006 Aug 8	Carbon source quality/availability	Negative	Indirect	Microarray analysis (WT vs TF overexpression)
YKL112W	ABF1	YPR178W	PRP4	15343339	2004 Sep 2	N/A	N/A	Direct	Chip-on-chip
YKL112W	ABF1	YPR178W	PRP4	16709784	2006 May 19	N/A	N/A	Direct	Chip-on-chip
YKL112W	ABF1	YPR186C	PZF1	15343339	2004 Sep 2	N/A	N/A	Direct	Chip-on-chip
YKL112W	ABF1	YPR186C	PZF1	16709784	2006 May 19	N/A	N/A	Direct	Chip-on-chip
YKL112W	ABF1	YPR187W	RPO26	8923739	1996 Oct	N/A	N/A
YKL112W	ABF1	YPR187W	RPO26	15343339	2004 Sep 2	N/A	N/A	Direct	Chip-on-chip
YKL112W	ABF1	YPR187W	RPO26	16709784	2006 May 19	N/A	N/A	Direct	Chip-on-chip
YKL112W	ABF1	YPR187W	RPO26	28158860	2017 May 5	Unstressed log-phase growth (control)	N/A	Direct	ChIP-seq
YER045C	ACA1	YAL012W	CYS3	20385592	2010 Aug	Unstressed log-phase growth (control)	Positive	Indirect	Microarray analysis - wt vs TF mutant
YER045C	ACA1	YAL014C	SYN8	20385592	2010 Aug	Unstressed log-phase growth (control)	Positive	Indirect	Microarray analysis - wt vs TF mutant
YER045C	ACA1	YAL018C	LDS1	20385592	2010 Aug	Unstressed log-phase growth (control)	Negative	Indirect	Microarray analysis - wt vs TF mutant
YER045C	ACA1	YAL022C	FUN26	20385592	2010 Aug	Unstressed log-phase growth (control)	Positive	Indirect	Microarray analysis - wt vs TF mutant
YER045C	ACA1	YAL042W	ERV46	20385592	2010 Aug	Unstressed log-phase growth (control)	Positive	Indirect	Microarray analysis - wt vs TF mutant
YER045C	ACA1	YAR075W	Uncharacterized	20385592	2010 Aug	Unstressed log-phase growth (control)	Positive	Indirect	Microarray analysis - wt vs TF mutant
YER045C	ACA1	YBL030C	PET9	20385592	2010 Aug	Unstressed log-phase growth (control)	Positive	Indirect	Microarray analysis - wt vs TF mutant
YER045C	ACA1	YBL032W	HEK2	20385592	2010 Aug	Unstressed log-phase growth (control)	Positive	Indirect	Microarray analysis - wt vs TF mutant
YER045C	ACA1	YBL062W	Uncharacterized	20385592	2010 Aug	Unstressed log-phase growth (control)	Negative	Indirect	Microarray analysis - wt vs TF mutant
YER045C	ACA1	YBL073W	Uncharacterized	20385592	2010 Aug	Unstressed log-phase growth (control)	Negative	Indirect	Microarray analysis - wt vs TF mutant
YER045C	ACA1	YBR011C	IPP1	20385592	2010 Aug	Unstressed log-phase growth (control)	Positive	Indirect	Microarray analysis - wt vs TF mutant
YER045C	ACA1	YBR031W	RPL4A	20385592	2010 Aug	Unstressed log-phase growth (control)	Positive	Indirect	Microarray analysis - wt vs TF mutant
YER045C	ACA1	YBR067C	TIP1	20385592	2010 Aug	Unstressed log-phase growth (control)	Positive	Indirect	Microarray analysis - wt vs TF mutant
YER045C	ACA1	YBR090C	YBR090C	20385592	2010 Aug	Unstressed log-phase growth (control)	Negative	Indirect	Microarray analysis - wt vs TF mutant
YER045C	ACA1	YBR118W	TEF2	20385592	2010 Aug	Unstressed log-phase growth (control)	Positive	Indirect	Microarray analysis - wt vs TF mutant
YER045C	ACA1	YBR187W	GDT1	20385592	2010 Aug	Unstressed log-phase growth (control)	Positive	Indirect	Microarray analysis - wt vs TF mutant
YER045C	ACA1	YBR234C	ARC40	20385592	2010 Aug	Unstressed log-phase growth (control)	Positive	Indirect	Microarray analysis - wt vs TF mutant
YER045C	ACA1	YBR240C	THI2	20385592	2010 Aug	Unstressed log-phase growth (control)	Negative	Indirect	Microarray analysis - wt vs TF mutant
YER045C	ACA1	YBR265W	TSC10	20385592	2010 Aug	Unstressed log-phase growth (control)	Positive	Indirect	Microarray analysis - wt vs TF mutant
YER045C	ACA1	YBR273C	UBX7	20385592	2010 Aug	Unstressed log-phase growth (control)	Negative	Indirect	Microarray analysis - wt vs TF mutant
YER045C	ACA1	YBR283C	SSH1	20385592	2010 Aug	Unstressed log-phase growth (control)	Positive	Indirect	Microarray analysis - wt vs TF mutant
YER045C	ACA1	YCL004W	PGS1	20385592	2010 Aug	Unstressed log-phase growth (control)	Positive	Indirect	Microarray analysis - wt vs TF mutant
YER045C	ACA1	YCL009C	ILV6	20385592	2010 Aug	Unstressed log-phase growth (control)	Positive	Indirect	Microarray analysis - wt vs TF mutant
YER045C	ACA1	YCL018W	LEU2	20385592	2010 Aug	Unstressed log-phase growth (control)	Positive	Indirect	Microarray analysis - wt vs TF mutant
YER045C	ACA1	YCL027W	FUS1	20385592	2010 Aug	Unstressed log-phase growth (control)	Positive	Indirect	Microarray analysis - wt vs TF mutant
YER045C	ACA1	YCL054W	SPB1	20385592	2010 Aug	Unstressed log-phase growth (control)	Negative	Indirect	Microarray analysis - wt vs TF mutant
YER045C	ACA1	YCL065W	Uncharacterized	20385592	2010 Aug	Unstressed log-phase growth (control)	Positive	Indirect	Microarray analysis - wt vs TF mutant
YER045C	ACA1	YCL066W	HMLALPHA1	20385592	2010 Aug	Unstressed log-phase growth (control)	Positive	Indirect	Microarray analysis - wt vs TF mutant
YER045C	ACA1	YCR013C	Uncharacterized	20385592	2010 Aug	Unstressed log-phase growth (control)	Positive	Indirect	Microarray analysis - wt vs TF mutant
YER045C	ACA1	YCR040W	MATALPHA1	20385592	2010 Aug	Unstressed log-phase growth (control)	Positive	Indirect	Microarray analysis - wt vs TF mutant
YER045C	ACA1	YCR041W	YCR041W	20385592	2010 Aug	Unstressed log-phase growth (control)	Positive	Indirect	Microarray analysis - wt vs TF mutant
YER045C	ACA1	YCR059C	YIH1	20385592	2010 Aug	Unstressed log-phase growth (control)	Positive	Indirect	Microarray analysis - wt vs TF mutant
YER045C	ACA1	YCR073W-A	SOL2	20385592	2010 Aug	Unstressed log-phase growth (control)	Positive	Indirect	Microarray analysis - wt vs TF mutant
YER045C	ACA1	YCR097W	HMRA1	20385592	2010 Aug	Unstressed log-phase growth (control)	Negative	Indirect	Microarray analysis - wt vs TF mutant
YER045C	ACA1	YCR097W-A	Uncharacterized	20385592	2010 Aug	Unstressed log-phase growth (control)	Negative	Indirect	Microarray analysis - wt vs TF mutant
YER045C	ACA1	YDL012C	YDL012C	20385592	2010 Aug	Unstressed log-phase growth (control)	Positive	Indirect	Microarray analysis - wt vs TF mutant
YER045C	ACA1	YDL015C	TSC13	20385592	2010 Aug	Unstressed log-phase growth (control)	Positive	Indirect	Microarray analysis - wt vs TF mutant
YER045C	ACA1	YDL057W	YDL057W	20385592	2010 Aug	Unstressed log-phase growth (control)	Negative	Indirect	Microarray analysis - wt vs TF mutant
YER045C	ACA1	YDL058W	USO1	20385592	2010 Aug	Unstressed log-phase growth (control)	Negative	Indirect	Microarray analysis - wt vs TF mutant
YER045C	ACA1	YDL127W	PCL2	20385592	2010 Aug	Unstressed log-phase growth (control)	Positive	Indirect	Microarray analysis - wt vs TF mutant
YER045C	ACA1	YDL131W	LYS21	20385592	2010 Aug	Unstressed log-phase growth (control)	Positive	Indirect	Microarray analysis - wt vs TF mutant
YER045C	ACA1	YDL153C	SAS10	20385592	2010 Aug	Unstressed log-phase growth (control)	Negative	Indirect	Microarray analysis - wt vs TF mutant
YER045C	ACA1	YDL190C	UFD2	20385592	2010 Aug	Unstressed log-phase growth (control)	Positive	Indirect	Microarray analysis - wt vs TF mutant
YER045C	ACA1	YDL191W	RPL35A	20385592	2010 Aug	Unstressed log-phase growth (control)	Negative	Indirect	Microarray analysis - wt vs TF mutant
YER045C	ACA1	YDL211C	YDL211C	20385592	2010 Aug	Unstressed log-phase growth (control)	Positive	Indirect	Microarray analysis - wt vs TF mutant
YER045C	ACA1	YDR012W	RPL4B	20385592	2010 Aug	Unstressed log-phase growth (control)	Positive	Indirect	Microarray analysis - wt vs TF mutant
YER045C	ACA1	YDR126W	SWF1	20385592	2010 Aug	Unstressed log-phase growth (control)	Positive	Indirect	Microarray analysis - wt vs TF mutant
YER045C	ACA1	YDR284C	DPP1	20385592	2010 Aug	Unstressed log-phase growth (control)	Positive	Indirect	Microarray analysis - wt vs TF mutant
YER045C	ACA1	YDR309C	GIC2	20385592	2010 Aug	Unstressed log-phase growth (control)	Positive	Indirect	Microarray analysis - wt vs TF mutant
YER045C	ACA1	YDR315C	IPK1	20385592	2010 Aug	Unstressed log-phase growth (control)	Negative	Indirect	Microarray analysis - wt vs TF mutant
YER045C	ACA1	YDR332W	IRC3	15343339	2004 Sep 2	N/A	N/A	Direct	Chip-on-chip
YER045C	ACA1	YDR332W	IRC3	20385592	2010 Aug	Unstressed log-phase growth (control)	Negative	Indirect	Microarray analysis - wt vs TF mutant
YER045C	ACA1	YDR344C	YDR344C	20385592	2010 Aug	Unstressed log-phase growth (control)	Negative	Indirect	Microarray analysis - wt vs TF mutant
YER045C	ACA1	YDR461W	MFA1	20385592	2010 Aug	Unstressed log-phase growth (control)	Negative	Indirect	Microarray analysis - wt vs TF mutant
YER045C	ACA1	YDR502C	SAM2	20385592	2010 Aug	Unstressed log-phase growth (control)	Positive	Indirect	Microarray analysis - wt vs TF mutant
YER045C	ACA1	YDR525W-A	SNA2	20385592	2010 Aug	Unstressed log-phase growth (control)	Positive	Indirect	Microarray analysis - wt vs TF mutant
YER045C	ACA1	YEL006W	YEA6	20385592	2010 Aug	Unstressed log-phase growth (control)	Positive	Indirect	Microarray analysis - wt vs TF mutant
YER045C	ACA1	YEL038W	UTR4	20385592	2010 Aug	Unstressed log-phase growth (control)	Positive	Indirect	Microarray analysis - wt vs TF mutant
YER045C	ACA1	YER001W	MNN1	20385592	2010 Aug	Unstressed log-phase growth (control)	Negative	Indirect	Microarray analysis - wt vs TF mutant
YER045C	ACA1	YER003C	PMI40	20385592	2010 Aug	Unstressed log-phase growth (control)	Positive	Indirect	Microarray analysis - wt vs TF mutant
YER045C	ACA1	YER010C	YER010C	20385592	2010 Aug	Unstressed log-phase growth (control)	Positive	Indirect	Microarray analysis - wt vs TF mutant
YER045C	ACA1	YER026C	CHO1	20385592	2010 Aug	Unstressed log-phase growth (control)	Positive	Indirect	Microarray analysis - wt vs TF mutant
YER045C	ACA1	YER073W	ALD5	20385592	2010 Aug	Unstressed log-phase growth (control)	Negative	Indirect	Microarray analysis - wt vs TF mutant
YER045C	ACA1	YER083C	GET2	20385592	2010 Aug	Unstressed log-phase growth (control)	Positive	Indirect	Microarray analysis - wt vs TF mutant
YER045C	ACA1	YER154W	OXA1	20385592	2010 Aug	Unstressed log-phase growth (control)	Positive	Indirect	Microarray analysis - wt vs TF mutant
YER045C	ACA1	YFL010C	WWM1	20385592	2010 Aug	Unstressed log-phase growth (control)	Positive	Indirect	Microarray analysis - wt vs TF mutant
YER045C	ACA1	YFL023W	BUD27	20385592	2010 Aug	Unstressed log-phase growth (control)	Negative	Indirect	Microarray analysis - wt vs TF mutant
YER045C	ACA1	YFL026W	STE2	20385592	2010 Aug	Unstressed log-phase growth (control)	Negative	Indirect	Microarray analysis - wt vs TF mutant
YER045C	ACA1	YFL037W	TUB2	20385592	2010 Aug	Unstressed log-phase growth (control)	Positive	Indirect	Microarray analysis - wt vs TF mutant
YER045C	ACA1	YFL052W	ZNF1	20385592	2010 Aug	Unstressed log-phase growth (control)	Negative	Indirect	Microarray analysis - wt vs TF mutant
YER045C	ACA1	YFR005C	SAD1	20385592	2010 Aug	Unstressed log-phase growth (control)	Positive	Indirect	Microarray analysis - wt vs TF mutant
YER045C	ACA1	YFR006W	YFR006W	20385592	2010 Aug	Unstressed log-phase growth (control)	Positive	Indirect	Microarray analysis - wt vs TF mutant
YER045C	ACA1	YFR044C	DUG1	20385592	2010 Aug	Unstressed log-phase growth (control)	Positive	Indirect	Microarray analysis - wt vs TF mutant
YER045C	ACA1	YGL009C	LEU1	20385592	2010 Aug	Unstressed log-phase growth (control)	Negative	Indirect	Microarray analysis - wt vs TF mutant
YER045C	ACA1	YGL032C	AGA2	20385592	2010 Aug	Unstressed log-phase growth (control)	Negative	Indirect	Microarray analysis - wt vs TF mutant
YER045C	ACA1	YGL089C	MF(ALPHA)2	20385592	2010 Aug	Unstressed log-phase growth (control)	Positive	Indirect	Microarray analysis - wt vs TF mutant
YER045C	ACA1	YGL095C	VPS45	20385592	2010 Aug	Unstressed log-phase growth (control)	Negative	Indirect	Microarray analysis - wt vs TF mutant
YER045C	ACA1	YGL104C	VPS73	20385592	2010 Aug	Unstressed log-phase growth (control)	Positive	Indirect	Microarray analysis - wt vs TF mutant
YER045C	ACA1	YGL105W	ARC1	20385592	2010 Aug	Unstressed log-phase growth (control)	Positive	Indirect	Microarray analysis - wt vs TF mutant
YER045C	ACA1	YGL148W	ARO2	20385592	2010 Aug	Unstressed log-phase growth (control)	Positive	Indirect	Microarray analysis - wt vs TF mutant
YER045C	ACA1	YGL198W	YIP4	20385592	2010 Aug	Unstressed log-phase growth (control)	Positive	Indirect	Microarray analysis - wt vs TF mutant
YER045C	ACA1	YGL199C	Uncharacterized	20385592	2010 Aug	Unstressed log-phase growth (control)	Positive	Indirect	Microarray analysis - wt vs TF mutant
YER045C	ACA1	YGL205W	POX1	20385592	2010 Aug	Unstressed log-phase growth (control)	Positive	Indirect	Microarray analysis - wt vs TF mutant
YER045C	ACA1	YGL208W	SIP2	20385592	2010 Aug	Unstressed log-phase growth (control)	Positive	Indirect	Microarray analysis - wt vs TF mutant
YER045C	ACA1	YGL225W	VRG4	20385592	2010 Aug	Unstressed log-phase growth (control)	Positive	Indirect	Microarray analysis - wt vs TF mutant
YER045C	ACA1	YGL237C	HAP2	20385592	2010 Aug	Unstressed log-phase growth (control)	Positive	Indirect	Microarray analysis - wt vs TF mutant
YER045C	ACA1	YGR038W	ORM1	20385592	2010 Aug	Unstressed log-phase growth (control)	Positive	Indirect	Microarray analysis - wt vs TF mutant
YER045C	ACA1	YGR109W-A	YGR109W-A	20385592	2010 Aug	Unstressed log-phase growth (control)	Positive	Indirect	Microarray analysis - wt vs TF mutant
YER045C	ACA1	YGR115C	Uncharacterized	20385592	2010 Aug	Unstressed log-phase growth (control)	Negative	Indirect	Microarray analysis - wt vs TF mutant
YER045C	ACA1	YGR137W	Uncharacterized	20385592	2010 Aug	Unstressed log-phase growth (control)	Positive	Indirect	Microarray analysis - wt vs TF mutant
YER045C	ACA1	YGR172C	YIP1	20385592	2010 Aug	Unstressed log-phase growth (control)	Positive	Indirect	Microarray analysis - wt vs TF mutant
YER045C	ACA1	YGR176W	Uncharacterized	20385592	2010 Aug	Unstressed log-phase growth (control)	Positive	Indirect	Microarray analysis - wt vs TF mutant
YER045C	ACA1	YGR186W	TFG1	20385592	2010 Aug	Unstressed log-phase growth (control)	Negative	Indirect	Microarray analysis - wt vs TF mutant
YER045C	ACA1	YGR192C	TDH3	20385592	2010 Aug	Unstressed log-phase growth (control)	Positive	Indirect	Microarray analysis - wt vs TF mutant
YER045C	ACA1	YGR214W	RPS0A	20385592	2010 Aug	Unstressed log-phase growth (control)	Positive	Indirect	Microarray analysis - wt vs TF mutant
YER045C	ACA1	YGR233C	PHO81	20385592	2010 Aug	Unstressed log-phase growth (control)	Negative	Indirect	Microarray analysis - wt vs TF mutant
YER045C	ACA1	YGR274C	TAF1	20385592	2010 Aug	Unstressed log-phase growth (control)	Negative	Indirect	Microarray analysis - wt vs TF mutant
YER045C	ACA1	YGR279C	SCW4	20385592	2010 Aug	Unstressed log-phase growth (control)	Positive	Indirect	Microarray analysis - wt vs TF mutant
YER045C	ACA1	YGR280C	PXR1	20385592	2010 Aug	Unstressed log-phase growth (control)	Negative	Indirect	Microarray analysis - wt vs TF mutant
YER045C	ACA1	YGR282C	BGL2	20385592	2010 Aug	Unstressed log-phase growth (control)	Positive	Indirect	Microarray analysis - wt vs TF mutant
YER045C	ACA1	YHL014C	YLF2	20385592	2010 Aug	Unstressed log-phase growth (control)	Positive	Indirect	Microarray analysis - wt vs TF mutant
YER045C	ACA1	YHL048W	COS8	12051917	2002 May 31	N/A	Negative	Indirect	lacZ wt vs TF mutant
YER045C	ACA1	YHR025W	THR1	20385592	2010 Aug	Unstressed log-phase growth (control)	Positive	Indirect	Microarray analysis - wt vs TF mutant
YER045C	ACA1	YHR026W	VMA16	20385592	2010 Aug	Unstressed log-phase growth (control)	Positive	Indirect	Microarray analysis - wt vs TF mutant
YER045C	ACA1	YHR072W-A	NOP10	20385592	2010 Aug	Unstressed log-phase growth (control)	Negative	Indirect	Microarray analysis - wt vs TF mutant
YER045C	ACA1	YHR106W	TRR2	20385592	2010 Aug	Unstressed log-phase growth (control)	Positive	Indirect	Microarray analysis - wt vs TF mutant
YER045C	ACA1	YHR123W	EPT1	20385592	2010 Aug	Unstressed log-phase growth (control)	Positive	Indirect	Microarray analysis - wt vs TF mutant
YER045C	ACA1	YHR133C	NSG1	20385592	2010 Aug	Unstressed log-phase growth (control)	Positive	Indirect	Microarray analysis - wt vs TF mutant
YER045C	ACA1	YHR142W	CHS7	20385592	2010 Aug	Unstressed log-phase growth (control)	Positive	Indirect	Microarray analysis - wt vs TF mutant
YER045C	ACA1	YHR143W-A	RPC10	20385592	2010 Aug	Unstressed log-phase growth (control)	Negative	Indirect	Microarray analysis - wt vs TF mutant
YER045C	ACA1	YHR184W	SSP1	20385592	2010 Aug	Unstressed log-phase growth (control)	Positive	Indirect	Microarray analysis - wt vs TF mutant
YER045C	ACA1	YHR188C	GPI16	20385592	2010 Aug	Unstressed log-phase growth (control)	Positive	Indirect	Microarray analysis - wt vs TF mutant
YER045C	ACA1	YHR190W	ERG9	20385592	2010 Aug	Unstressed log-phase growth (control)	Positive	Indirect	Microarray analysis - wt vs TF mutant
YER045C	ACA1	YHR200W	RPN10	20385592	2010 Aug	Unstressed log-phase growth (control)	Positive	Indirect	Microarray analysis - wt vs TF mutant
YER045C	ACA1	YHR203C	RPS4B	20385592	2010 Aug	Unstressed log-phase growth (control)	Positive	Indirect	Microarray analysis - wt vs TF mutant
YER045C	ACA1	YHR208W	BAT1	20385592	2010 Aug	Unstressed log-phase growth (control)	Negative	Indirect	Microarray analysis - wt vs TF mutant
YER045C	ACA1	YHR216W	IMD2	20385592	2010 Aug	Unstressed log-phase growth (control)	Positive	Indirect	Microarray analysis - wt vs TF mutant
YER045C	ACA1	YIL015W	BAR1	20385592	2010 Aug	Unstressed log-phase growth (control)	Negative	Indirect	Microarray analysis - wt vs TF mutant
YER045C	ACA1	YIL018W	RPL2B	20385592	2010 Aug	Unstressed log-phase growth (control)	Positive	Indirect	Microarray analysis - wt vs TF mutant
YER045C	ACA1	YIL033C	BCY1	20385592	2010 Aug	Unstressed log-phase growth (control)	Positive	Indirect	Microarray analysis - wt vs TF mutant
YER045C	ACA1	YIL084C	SDS3	20385592	2010 Aug	Unstressed log-phase growth (control)	Negative	Indirect	Microarray analysis - wt vs TF mutant
YER045C	ACA1	YIL086C	YIL086C	20385592	2010 Aug	Unstressed log-phase growth (control)	Positive	Indirect	Microarray analysis - wt vs TF mutant
YER045C	ACA1	YIL089W	YIL089W	20385592	2010 Aug	Unstressed log-phase growth (control)	Positive	Indirect	Microarray analysis - wt vs TF mutant
YER045C	ACA1	YIL146C	ATG32	20385592	2010 Aug	Unstressed log-phase growth (control)	Positive	Indirect	Microarray analysis - wt vs TF mutant
YER045C	ACA1	YIL151C	ESL1	20385592	2010 Aug	Unstressed log-phase growth (control)	Positive	Indirect	Microarray analysis - wt vs TF mutant
YER045C	ACA1	YIR004W	DJP1	20385592	2010 Aug	Unstressed log-phase growth (control)	Negative	Indirect	Microarray analysis - wt vs TF mutant
YER045C	ACA1	YIR034C	LYS1	20385592	2010 Aug	Unstressed log-phase growth (control)	Positive	Indirect	Microarray analysis - wt vs TF mutant
YER045C	ACA1	YJL068C	YJL068C	20385592	2010 Aug	Unstressed log-phase growth (control)	Positive	Indirect	Microarray analysis - wt vs TF mutant
YER045C	ACA1	YJL093C	TOK1	20385592	2010 Aug	Unstressed log-phase growth (control)	Positive	Indirect	Microarray analysis - wt vs TF mutant
YER045C	ACA1	YJL102W	MEF2	20385592	2010 Aug	Unstressed log-phase growth (control)	Negative	Indirect	Microarray analysis - wt vs TF mutant
YER045C	ACA1	YJL121C	RPE1	20385592	2010 Aug	Unstressed log-phase growth (control)	Positive	Indirect	Microarray analysis - wt vs TF mutant
YER045C	ACA1	YJL144W	ROQ1	20385592	2010 Aug	Unstressed log-phase growth (control)	Negative	Indirect	Microarray analysis - wt vs TF mutant
YER045C	ACA1	YJL158C	CIS3	20385592	2010 Aug	Unstressed log-phase growth (control)	Positive	Indirect	Microarray analysis - wt vs TF mutant
YER045C	ACA1	YJR004C	SAG1	20385592	2010 Aug	Unstressed log-phase growth (control)	Positive	Indirect	Microarray analysis - wt vs TF mutant
YER045C	ACA1	YJR009C	TDH2	20385592	2010 Aug	Unstressed log-phase growth (control)	Positive	Indirect	Microarray analysis - wt vs TF mutant
YER045C	ACA1	YJR020W	Uncharacterized	20385592	2010 Aug	Unstressed log-phase growth (control)	Positive	Indirect	Microarray analysis - wt vs TF mutant
YER045C	ACA1	YJR050W	ISY1	20385592	2010 Aug	Unstressed log-phase growth (control)	Negative	Indirect	Microarray analysis - wt vs TF mutant
YER045C	ACA1	YJR117W	STE24	20385592	2010 Aug	Unstressed log-phase growth (control)	Positive	Indirect	Microarray analysis - wt vs TF mutant
YER045C	ACA1	YJR139C	HOM6	20385592	2010 Aug	Unstressed log-phase growth (control)	Positive	Indirect	Microarray analysis - wt vs TF mutant
YER045C	ACA1	YJR145C	RPS4A	20385592	2010 Aug	Unstressed log-phase growth (control)	Positive	Indirect	Microarray analysis - wt vs TF mutant
YER045C	ACA1	YJR148W	BAT2	20385592	2010 Aug	Unstressed log-phase growth (control)	Positive	Indirect	Microarray analysis - wt vs TF mutant
YER045C	ACA1	YKL018W	SWD2	20385592	2010 Aug	Unstressed log-phase growth (control)	Positive	Indirect	Microarray analysis - wt vs TF mutant
YER045C	ACA1	YKL089W	MIF2	20385592	2010 Aug	Unstressed log-phase growth (control)	Negative	Indirect	Microarray analysis - wt vs TF mutant
YER045C	ACA1	YKL120W	OAC1	20385592	2010 Aug	Unstressed log-phase growth (control)	Negative	Indirect	Microarray analysis - wt vs TF mutant
YER045C	ACA1	YKL141W	SDH3	20385592	2010 Aug	Unstressed log-phase growth (control)	Positive	Indirect	Microarray analysis - wt vs TF mutant
YER045C	ACA1	YKL146W	AVT3	20385592	2010 Aug	Unstressed log-phase growth (control)	Positive	Indirect	Microarray analysis - wt vs TF mutant
YER045C	ACA1	YKL177W	Uncharacterized	20385592	2010 Aug	Unstressed log-phase growth (control)	Positive	Indirect	Microarray analysis - wt vs TF mutant
YER045C	ACA1	YKL178C	STE3	20385592	2010 Aug	Unstressed log-phase growth (control)	Positive	Indirect	Microarray analysis - wt vs TF mutant
YER045C	ACA1	YKL197C	PEX1	20385592	2010 Aug	Unstressed log-phase growth (control)	Negative	Indirect	Microarray analysis - wt vs TF mutant
YER045C	ACA1	YKL207W	EMC3	20385592	2010 Aug	Unstressed log-phase growth (control)	Positive	Indirect	Microarray analysis - wt vs TF mutant
YER045C	ACA1	YKL209C	STE6	20385592	2010 Aug	Unstressed log-phase growth (control)	Negative	Indirect	Microarray analysis - wt vs TF mutant
YER045C	ACA1	YKL216W	URA1	20385592	2010 Aug	Unstressed log-phase growth (control)	Negative	Indirect	Microarray analysis - wt vs TF mutant
YER045C	ACA1	YKR012C	Uncharacterized	20385592	2010 Aug	Unstressed log-phase growth (control)	Positive	Indirect	Microarray analysis - wt vs TF mutant
YER045C	ACA1	YKR013W	PRY2	20385592	2010 Aug	Unstressed log-phase growth (control)	Positive	Indirect	Microarray analysis - wt vs TF mutant
YER045C	ACA1	YKR035W-A	DID2	20385592	2010 Aug	Unstressed log-phase growth (control)	Negative	Indirect	Microarray analysis - wt vs TF mutant
YER045C	ACA1	YKR042W	UTH1	20385592	2010 Aug	Unstressed log-phase growth (control)	Positive	Indirect	Microarray analysis - wt vs TF mutant
YER045C	ACA1	YKR086W	PRP16	20385592	2010 Aug	Unstressed log-phase growth (control)	Negative	Indirect	Microarray analysis - wt vs TF mutant
YER045C	ACA1	YKR093W	PTR2	20385592	2010 Aug	Unstressed log-phase growth (control)	Positive	Indirect	Microarray analysis - wt vs TF mutant
YER045C	ACA1	YLL010C	PSR1	20385592	2010 Aug	Unstressed log-phase growth (control)	Positive	Indirect	Microarray analysis - wt vs TF mutant
YER045C	ACA1	YLL023C	POM33	20385592	2010 Aug	Unstressed log-phase growth (control)	Positive	Indirect	Microarray analysis - wt vs TF mutant
YER045C	ACA1	YLR040C	AFB1	20385592	2010 Aug	Unstressed log-phase growth (control)	Positive	Indirect	Microarray analysis - wt vs TF mutant
YER045C	ACA1	YLR041W	Uncharacterized	20385592	2010 Aug	Unstressed log-phase growth (control)	Positive	Indirect	Microarray analysis - wt vs TF mutant
YER045C	ACA1	YLR042C	YLR042C	20385592	2010 Aug	Unstressed log-phase growth (control)	Positive	Indirect	Microarray analysis - wt vs TF mutant
YER045C	ACA1	YLR051C	FCF2	20385592	2010 Aug	Unstressed log-phase growth (control)	Negative	Indirect	Microarray analysis - wt vs TF mutant
YER045C	ACA1	YLR056W	ERG3	20385592	2010 Aug	Unstressed log-phase growth (control)	Positive	Indirect	Microarray analysis - wt vs TF mutant
YER045C	ACA1	YLR064W	PER33	20385592	2010 Aug	Unstressed log-phase growth (control)	Positive	Indirect	Microarray analysis - wt vs TF mutant
YER045C	ACA1	YLR099C	ICT1	20385592	2010 Aug	Unstressed log-phase growth (control)	Positive	Indirect	Microarray analysis - wt vs TF mutant
YER045C	ACA1	YLR100W	ERG27	20385592	2010 Aug	Unstressed log-phase growth (control)	Positive	Indirect	Microarray analysis - wt vs TF mutant
YER045C	ACA1	YLR101C	Uncharacterized	20385592	2010 Aug	Unstressed log-phase growth (control)	Positive	Indirect	Microarray analysis - wt vs TF mutant
YER045C	ACA1	YLR180W	SAM1	20385592	2010 Aug	Unstressed log-phase growth (control)	Positive	Indirect	Microarray analysis - wt vs TF mutant
YER045C	ACA1	YLR185W	RPL37A	20385592	2010 Aug	Unstressed log-phase growth (control)	Negative	Indirect	Microarray analysis - wt vs TF mutant
YER045C	ACA1	YLR247C	IRC20	20385592	2010 Aug	Unstressed log-phase growth (control)	Negative	Indirect	Microarray analysis - wt vs TF mutant
YER045C	ACA1	YLR252W	Uncharacterized	20385592	2010 Aug	Unstressed log-phase growth (control)	Positive	Indirect	Microarray analysis - wt vs TF mutant
YER045C	ACA1	YLR293C	GSP1	20385592	2010 Aug	Unstressed log-phase growth (control)	Positive	Indirect	Microarray analysis - wt vs TF mutant
YER045C	ACA1	YLR302C	YLR302C	20385592	2010 Aug	Unstressed log-phase growth (control)	Positive	Indirect	Microarray analysis - wt vs TF mutant
YER045C	ACA1	YLR303W	MET17	20385592	2010 Aug	Unstressed log-phase growth (control)	Positive	Indirect	Microarray analysis - wt vs TF mutant
YER045C	ACA1	YLR339C	Uncharacterized	20385592	2010 Aug	Unstressed log-phase growth (control)	Positive	Indirect	Microarray analysis - wt vs TF mutant
YER045C	ACA1	YLR340W	RPP0	20385592	2010 Aug	Unstressed log-phase growth (control)	Positive	Indirect	Microarray analysis - wt vs TF mutant
YER045C	ACA1	YLR343W	GAS2	20385592	2010 Aug	Unstressed log-phase growth (control)	Negative	Indirect	Microarray analysis - wt vs TF mutant
YER045C	ACA1	YLR349W	Uncharacterized	20385592	2010 Aug	Unstressed log-phase growth (control)	Negative	Indirect	Microarray analysis - wt vs TF mutant
YER045C	ACA1	YLR372W	ELO3	20385592	2010 Aug	Unstressed log-phase growth (control)	Positive	Indirect	Microarray analysis - wt vs TF mutant
YER045C	ACA1	YLR374C	Uncharacterized	20385592	2010 Aug	Unstressed log-phase growth (control)	Positive	Indirect	Microarray analysis - wt vs TF mutant
YER045C	ACA1	YLR380W	CSR1	20385592	2010 Aug	Unstressed log-phase growth (control)	Positive	Indirect	Microarray analysis - wt vs TF mutant
YER045C	ACA1	YLR420W	URA4	20385592	2010 Aug	Unstressed log-phase growth (control)	Negative	Indirect	Microarray analysis - wt vs TF mutant
YER045C	ACA1	YLR439W	MRPL4	20385592	2010 Aug	Unstressed log-phase growth (control)	Positive	Indirect	Microarray analysis - wt vs TF mutant
YER045C	ACA1	YLR444C	Uncharacterized	20385592	2010 Aug	Unstressed log-phase growth (control)	Positive	Indirect	Microarray analysis - wt vs TF mutant
YER045C	ACA1	YML019W	OST6	20385592	2010 Aug	Unstressed log-phase growth (control)	Positive	Indirect	Microarray analysis - wt vs TF mutant
YER045C	ACA1	YML055W	SPC2	20385592	2010 Aug	Unstressed log-phase growth (control)	Negative	Indirect	Microarray analysis - wt vs TF mutant
YER045C	ACA1	YML056C	IMD4	20385592	2010 Aug	Unstressed log-phase growth (control)	Positive	Indirect	Microarray analysis - wt vs TF mutant
YER045C	ACA1	YML067C	ERV41	20385592	2010 Aug	Unstressed log-phase growth (control)	Positive	Indirect	Microarray analysis - wt vs TF mutant
YER045C	ACA1	YML085C	TUB1	20385592	2010 Aug	Unstressed log-phase growth (control)	Positive	Indirect	Microarray analysis - wt vs TF mutant
YER045C	ACA1	YML092C	PRE8	20385592	2010 Aug	Unstressed log-phase growth (control)	Positive	Indirect	Microarray analysis - wt vs TF mutant
YER045C	ACA1	YML112W	CTK3	20385592	2010 Aug	Unstressed log-phase growth (control)	Positive	Indirect	Microarray analysis - wt vs TF mutant
YER045C	ACA1	YML113W	DAT1	20385592	2010 Aug	Unstressed log-phase growth (control)	Positive	Indirect	Microarray analysis - wt vs TF mutant
YER045C	ACA1	YML125C	PGA3	20385592	2010 Aug	Unstressed log-phase growth (control)	Positive	Indirect	Microarray analysis - wt vs TF mutant
YER045C	ACA1	YML126C	ERG13	20385592	2010 Aug	Unstressed log-phase growth (control)	Positive	Indirect	Microarray analysis - wt vs TF mutant
YER045C	ACA1	YMR014W	BUD22	20385592	2010 Aug	Unstressed log-phase growth (control)	Negative	Indirect	Microarray analysis - wt vs TF mutant
YER045C	ACA1	YMR044W	IOC4	20385592	2010 Aug	Unstressed log-phase growth (control)	Negative	Indirect	Microarray analysis - wt vs TF mutant
YER045C	ACA1	YMR083W	ADH3	20385592	2010 Aug	Unstressed log-phase growth (control)	Positive	Indirect	Microarray analysis - wt vs TF mutant
YER045C	ACA1	YMR089C	YTA12	20385592	2010 Aug	Unstressed log-phase growth (control)	Negative	Indirect	Microarray analysis - wt vs TF mutant
YER045C	ACA1	YMR116C	ASC1	20385592	2010 Aug	Unstressed log-phase growth (control)	Positive	Indirect	Microarray analysis - wt vs TF mutant
YER045C	ACA1	YMR155W	YMR155W	20385592	2010 Aug	Unstressed log-phase growth (control)	Positive	Indirect	Microarray analysis - wt vs TF mutant
YER045C	ACA1	YMR158W	MRPS8	20385592	2010 Aug	Unstressed log-phase growth (control)	Positive	Indirect	Microarray analysis - wt vs TF mutant
YER045C	ACA1	YMR169C	ALD3	20385592	2010 Aug	Unstressed log-phase growth (control)	Positive	Indirect	Microarray analysis - wt vs TF mutant
YER045C	ACA1	YMR202W	ERG2	20385592	2010 Aug	Unstressed log-phase growth (control)	Positive	Indirect	Microarray analysis - wt vs TF mutant
YER045C	ACA1	YMR203W	TOM40	20385592	2010 Aug	Unstressed log-phase growth (control)	Positive	Indirect	Microarray analysis - wt vs TF mutant
YER045C	ACA1	YMR207C	HFA1	20385592	2010 Aug	Unstressed log-phase growth (control)	Negative	Indirect	Microarray analysis - wt vs TF mutant
YER045C	ACA1	YMR232W	FUS2	20385592	2010 Aug	Unstressed log-phase growth (control)	Positive	Indirect	Microarray analysis - wt vs TF mutant
YER045C	ACA1	YMR276W	DSK2	20385592	2010 Aug	Unstressed log-phase growth (control)	Positive	Indirect	Microarray analysis - wt vs TF mutant
YER045C	ACA1	YMR295C	YMR295C	20385592	2010 Aug	Unstressed log-phase growth (control)	Positive	Indirect	Microarray analysis - wt vs TF mutant
YER045C	ACA1	YMR303C	ADH2	20385592	2010 Aug	Unstressed log-phase growth (control)	Positive	Indirect	Microarray analysis - wt vs TF mutant
YER045C	ACA1	YMR305C	SCW10	20385592	2010 Aug	Unstressed log-phase growth (control)	Positive	Indirect	Microarray analysis - wt vs TF mutant
YER045C	ACA1	YMR312W	ELP6	20385592	2010 Aug	Unstressed log-phase growth (control)	Positive	Indirect	Microarray analysis - wt vs TF mutant
YER045C	ACA1	YMR323W	ERR3	20385592	2010 Aug	Unstressed log-phase growth (control)	Positive	Indirect	Microarray analysis - wt vs TF mutant
YER045C	ACA1	YNL045W	LAP2	20385592	2010 Aug	Unstressed log-phase growth (control)	Positive	Indirect	Microarray analysis - wt vs TF mutant
YER045C	ACA1	YNL050C	YNL050C	20385592	2010 Aug	Unstressed log-phase growth (control)	Negative	Indirect	Microarray analysis - wt vs TF mutant
YER045C	ACA1	YNL055C	POR1	20385592	2010 Aug	Unstressed log-phase growth (control)	Positive	Indirect	Microarray analysis - wt vs TF mutant
YER045C	ACA1	YNL057W	Uncharacterized	20385592	2010 Aug	Unstressed log-phase growth (control)	Positive	Indirect	Microarray analysis - wt vs TF mutant
YER045C	ACA1	YNL058C	YNL058C	20385592	2010 Aug	Unstressed log-phase growth (control)	Positive	Indirect	Microarray analysis - wt vs TF mutant
YER045C	ACA1	YNL110C	NOP15	20385592	2010 Aug	Unstressed log-phase growth (control)	Negative	Indirect	Microarray analysis - wt vs TF mutant
YER045C	ACA1	YNL146W	YNL146W	20385592	2010 Aug	Unstressed log-phase growth (control)	Negative	Indirect	Microarray analysis - wt vs TF mutant
YER045C	ACA1	YNL263C	YIF1	20385592	2010 Aug	Unstressed log-phase growth (control)	Positive	Indirect	Microarray analysis - wt vs TF mutant
YER045C	ACA1	YNL279W	PRM1	20385592	2010 Aug	Unstressed log-phase growth (control)	Positive	Indirect	Microarray analysis - wt vs TF mutant
YER045C	ACA1	YNL300W	TOS6	20385592	2010 Aug	Unstressed log-phase growth (control)	Positive	Indirect	Microarray analysis - wt vs TF mutant
YER045C	ACA1	YNL307C	MCK1	20385592	2010 Aug	Unstressed log-phase growth (control)	Positive	Indirect	Microarray analysis - wt vs TF mutant
YER045C	ACA1	YNL312W	RFA2	20385592	2010 Aug	Unstressed log-phase growth (control)	Positive	Indirect	Microarray analysis - wt vs TF mutant
YER045C	ACA1	YNL322C	KRE1	20385592	2010 Aug	Unstressed log-phase growth (control)	Positive	Indirect	Microarray analysis - wt vs TF mutant
YER045C	ACA1	YNR032W	PPG1	20385592	2010 Aug	Unstressed log-phase growth (control)	Positive	Indirect	Microarray analysis - wt vs TF mutant
YER045C	ACA1	YNR035C	ARC35	20385592	2010 Aug	Unstressed log-phase growth (control)	Positive	Indirect	Microarray analysis - wt vs TF mutant
YER045C	ACA1	YNR044W	AGA1	20385592	2010 Aug	Unstressed log-phase growth (control)	Positive	Indirect	Microarray analysis - wt vs TF mutant
YER045C	ACA1	YNR071C	YNR071C	20385592	2010 Aug	Unstressed log-phase growth (control)	Positive	Indirect	Microarray analysis - wt vs TF mutant
YER045C	ACA1	YOL019W	YOL019W	20385592	2010 Aug	Unstressed log-phase growth (control)	Positive	Indirect	Microarray analysis - wt vs TF mutant
YER045C	ACA1	YOL047C	LDS2	20385592	2010 Aug	Unstressed log-phase growth (control)	Positive	Indirect	Microarray analysis - wt vs TF mutant
YER045C	ACA1	YOL086C	ADH1	20385592	2010 Aug	Unstressed log-phase growth (control)	Positive	Indirect	Microarray analysis - wt vs TF mutant
YER045C	ACA1	YOL111C	MDY2	20385592	2010 Aug	Unstressed log-phase growth (control)	Positive	Indirect	Microarray analysis - wt vs TF mutant
YER045C	ACA1	YOL126C	MDH2	20385592	2010 Aug	Unstressed log-phase growth (control)	Negative	Indirect	Microarray analysis - wt vs TF mutant
YER045C	ACA1	YOL132W	GAS4	20385592	2010 Aug	Unstressed log-phase growth (control)	Negative	Indirect	Microarray analysis - wt vs TF mutant
YER045C	ACA1	YOL143C	RIB4	20385592	2010 Aug	Unstressed log-phase growth (control)	Negative	Indirect	Microarray analysis - wt vs TF mutant
YER045C	ACA1	YOL144W	NOP8	20385592	2010 Aug	Unstressed log-phase growth (control)	Negative	Indirect	Microarray analysis - wt vs TF mutant
YER045C	ACA1	YOR019W	YOR019W	20385592	2010 Aug	Unstressed log-phase growth (control)	Negative	Indirect	Microarray analysis - wt vs TF mutant
YER045C	ACA1	YOR034C	AKR2	20385592	2010 Aug	Unstressed log-phase growth (control)	Positive	Indirect	Microarray analysis - wt vs TF mutant
YER045C	ACA1	YOR050C	Uncharacterized	20385592	2010 Aug	Unstressed log-phase growth (control)	Negative	Indirect	Microarray analysis - wt vs TF mutant
YER045C	ACA1	YOR063W	RPL3	20385592	2010 Aug	Unstressed log-phase growth (control)	Positive	Indirect	Microarray analysis - wt vs TF mutant
YER045C	ACA1	YOR084W	LPX1	20385592	2010 Aug	Unstressed log-phase growth (control)	Positive	Indirect	Microarray analysis - wt vs TF mutant
YER045C	ACA1	YOR182C	RPS30B	20385592	2010 Aug	Unstressed log-phase growth (control)	Negative	Indirect	Microarray analysis - wt vs TF mutant
YER045C	ACA1	YOR194C	TOA1	20385592	2010 Aug	Unstressed log-phase growth (control)	Negative	Indirect	Microarray analysis - wt vs TF mutant
YER045C	ACA1	YOR197W	MCA1	20385592	2010 Aug	Unstressed log-phase growth (control)	Positive	Indirect	Microarray analysis - wt vs TF mutant
YER045C	ACA1	YOR210W	RPB10	20385592	2010 Aug	Unstressed log-phase growth (control)	Negative	Indirect	Microarray analysis - wt vs TF mutant
YER045C	ACA1	YOR221C	MCT1	20385592	2010 Aug	Unstressed log-phase growth (control)	Positive	Indirect	Microarray analysis - wt vs TF mutant
YER045C	ACA1	YOR225W	Uncharacterized	20385592	2010 Aug	Unstressed log-phase growth (control)	Negative	Indirect	Microarray analysis - wt vs TF mutant
YER045C	ACA1	YOR226C	ISU2	20385592	2010 Aug	Unstressed log-phase growth (control)	Negative	Indirect	Microarray analysis - wt vs TF mutant
YER045C	ACA1	YOR229W	WTM2	20385592	2010 Aug	Unstressed log-phase growth (control)	Positive	Indirect	Microarray analysis - wt vs TF mutant
YER045C	ACA1	YOR239W	ABP140	20385592	2010 Aug	Unstressed log-phase growth (control)	Negative	Indirect	Microarray analysis - wt vs TF mutant
YER045C	ACA1	YOR243C	PUS7	20385592	2010 Aug	Unstressed log-phase growth (control)	Negative	Indirect	Microarray analysis - wt vs TF mutant
YER045C	ACA1	YOR245C	DGA1	20385592	2010 Aug	Unstressed log-phase growth (control)	Positive	Indirect	Microarray analysis - wt vs TF mutant
YER045C	ACA1	YOR246C	ENV9	20385592	2010 Aug	Unstressed log-phase growth (control)	Positive	Indirect	Microarray analysis - wt vs TF mutant
YER045C	ACA1	YOR247W	SRL1	20385592	2010 Aug	Unstressed log-phase growth (control)	Positive	Indirect	Microarray analysis - wt vs TF mutant
YER045C	ACA1	YOR248W	Uncharacterized	20385592	2010 Aug	Unstressed log-phase growth (control)	Positive	Indirect	Microarray analysis - wt vs TF mutant
YER045C	ACA1	YOR274W	MOD5	20385592	2010 Aug	Unstressed log-phase growth (control)	Negative	Indirect	Microarray analysis - wt vs TF mutant
YER045C	ACA1	YOR351C	MEK1	20385592	2010 Aug	Unstressed log-phase growth (control)	Positive	Indirect	Microarray analysis - wt vs TF mutant
YER045C	ACA1	YOR383C	FIT3	20385592	2010 Aug	Unstressed log-phase growth (control)	Negative	Indirect	Microarray analysis - wt vs TF mutant
YER045C	ACA1	YPL019C	VTC3	20385592	2010 Aug	Unstressed log-phase growth (control)	Negative	Indirect	Microarray analysis - wt vs TF mutant
YER045C	ACA1	YPL031C	PHO85	20385592	2010 Aug	Unstressed log-phase growth (control)	Positive	Indirect	Microarray analysis - wt vs TF mutant
YER045C	ACA1	YPL043W	NOP4	20385592	2010 Aug	Unstressed log-phase growth (control)	Negative	Indirect	Microarray analysis - wt vs TF mutant
YER045C	ACA1	YPL044C	Uncharacterized	20385592	2010 Aug	Unstressed log-phase growth (control)	Negative	Indirect	Microarray analysis - wt vs TF mutant
YER045C	ACA1	YPL048W	CAM1	20385592	2010 Aug	Unstressed log-phase growth (control)	Positive	Indirect	Microarray analysis - wt vs TF mutant
YER045C	ACA1	YPL063W	TIM50	20385592	2010 Aug	Unstressed log-phase growth (control)	Positive	Indirect	Microarray analysis - wt vs TF mutant
YER045C	ACA1	YPL067C	HTC1	20385592	2010 Aug	Unstressed log-phase growth (control)	Positive	Indirect	Microarray analysis - wt vs TF mutant
YER045C	ACA1	YPL078C	ATP4	15343339	2004 Sep 2	N/A	N/A	Direct	Chip-on-chip
YER045C	ACA1	YPL092W	SSU1	20385592	2010 Aug	Unstressed log-phase growth (control)	Positive	Indirect	Microarray analysis - wt vs TF mutant
YER045C	ACA1	YPL113C	YPL113C	20385592	2010 Aug	Unstressed log-phase growth (control)	Positive	Indirect	Microarray analysis - wt vs TF mutant
YER045C	ACA1	YPL163C	SVS1	20385592	2010 Aug	Unstressed log-phase growth (control)	Positive	Indirect	Microarray analysis - wt vs TF mutant
YER045C	ACA1	YPL187W	MF(ALPHA)1	20385592	2010 Aug	Unstressed log-phase growth (control)	Positive	Indirect	Microarray analysis - wt vs TF mutant
YER045C	ACA1	YPL229W	YPL229W	20385592	2010 Aug	Unstressed log-phase growth (control)	Positive	Indirect	Microarray analysis - wt vs TF mutant
YER045C	ACA1	YPL246C	RBD2	20385592	2010 Aug	Unstressed log-phase growth (control)	Positive	Indirect	Microarray analysis - wt vs TF mutant
YER045C	ACA1	YPL251W	Uncharacterized	20385592	2010 Aug	Unstressed log-phase growth (control)	Positive	Indirect	Microarray analysis - wt vs TF mutant
YER045C	ACA1	YPL252C	YAH1	20385592	2010 Aug	Unstressed log-phase growth (control)	Positive	Indirect	Microarray analysis - wt vs TF mutant
YER045C	ACA1	YPL262W	FUM1	20385592	2010 Aug	Unstressed log-phase growth (control)	Positive	Indirect	Microarray analysis - wt vs TF mutant
YER045C	ACA1	YPL280W	HSP32	20385592	2010 Aug	Unstressed log-phase growth (control)	Positive	Indirect	Microarray analysis - wt vs TF mutant
YER045C	ACA1	YPR059C	Uncharacterized	20385592	2010 Aug	Unstressed log-phase growth (control)	Positive	Indirect	Microarray analysis - wt vs TF mutant
YER045C	ACA1	YPR097W	YPR097W	20385592	2010 Aug	Unstressed log-phase growth (control)	Positive	Indirect	Microarray analysis - wt vs TF mutant
YER045C	ACA1	YPR099C	Uncharacterized	20385592	2010 Aug	Unstressed log-phase growth (control)	Positive	Indirect	Microarray analysis - wt vs TF mutant
YER045C	ACA1	YPR140W	TAZ1	20385592	2010 Aug	Unstressed log-phase growth (control)	Negative	Indirect	Microarray analysis - wt vs TF mutant
YER045C	ACA1	YPR158W	CUR1	20385592	2010 Aug	Unstressed log-phase growth (control)	Positive	Indirect	Microarray analysis - wt vs TF mutant
YER045C	ACA1	YPR176C	BET2	20385592	2010 Aug	Unstressed log-phase growth (control)	Positive	Indirect	Microarray analysis - wt vs TF mutant
YLR131C	ACE2	snR60	SNR60	12399584	2002 Oct 25	Unstressed log-phase growth (control)	N/A	Direct	Chip-on-chip
YLR131C	ACE2	YAL012W	CYS3	20385592	2010 Aug	Unstressed log-phase growth (control)	Positive	Indirect	Microarray analysis - wt vs TF mutant
YLR131C	ACE2	YAL022C	FUN26	20385592	2010 Aug	Unstressed log-phase growth (control)	Positive	Indirect	Microarray analysis - wt vs TF mutant
YLR131C	ACE2	YAL040C	CLN3	11572776	2001 Sep 21	Unstressed log-phase growth (control)	N/A	Direct	Chip-on-chip
YLR131C	ACE2	YAL040C	CLN3	19841732	2009 Oct	Nitrogen source quality/availability	N/A	Direct	ChIP
YLR131C	ACE2	YAL040C	CLN3	24493588	2014 Feb 3	Unstressed log-phase growth (control)	N/A	Direct	ChIP
YLR131C	ACE2	YAL042W	ERV46	20385592	2010 Aug	Unstressed log-phase growth (control)	Positive	Indirect	Microarray analysis - wt vs TF mutant
YLR131C	ACE2	YAL060W	BDH1	20385592	2010 Aug	Unstressed log-phase growth (control)	Positive	Indirect	Microarray analysis - wt vs TF mutant
YLR131C	ACE2	YAL062W	GDH3	12399584	2002 Oct 25	Unstressed log-phase growth (control)	N/A	Direct	Chip-on-chip
YLR131C	ACE2	YAL062W	GDH3	15343339	2004 Sep 2	N/A	N/A	Direct	Chip-on-chip
YLR131C	ACE2	YAR075W	Uncharacterized	20385592	2010 Aug	Unstressed log-phase growth (control)	Positive	Indirect	Microarray analysis - wt vs TF mutant
YLR131C	ACE2	YBL012C	Uncharacterized	20385592	2010 Aug	Unstressed log-phase growth (control)	Negative	Indirect	Microarray analysis - wt vs TF mutant
YLR131C	ACE2	YBL023C	MCM2	12399584	2002 Oct 25	Unstressed log-phase growth (control)	N/A	Direct	Chip-on-chip
YLR131C	ACE2	YBL023C	MCM2	15343339	2004 Sep 2	N/A	N/A	Direct	Chip-on-chip
YLR131C	ACE2	YBL026W	LSM2	20385592	2010 Aug	Unstressed log-phase growth (control)	Negative	Indirect	Microarray analysis - wt vs TF mutant
YLR131C	ACE2	YBL030C	PET9	20385592	2010 Aug	Unstressed log-phase growth (control)	Positive	Indirect	Microarray analysis - wt vs TF mutant
YLR131C	ACE2	YBL032W	HEK2	20385592	2010 Aug	Unstressed log-phase growth (control)	Positive	Indirect	Microarray analysis - wt vs TF mutant
YLR131C	ACE2	YBL059C-A	CMC2	20385592	2010 Aug	Unstressed log-phase growth (control)	Negative	Indirect	Microarray analysis - wt vs TF mutant
YLR131C	ACE2	YBL062W	Uncharacterized	20385592	2010 Aug	Unstressed log-phase growth (control)	Negative	Indirect	Microarray analysis - wt vs TF mutant
YLR131C	ACE2	YBL082C	ALG3	20385592	2010 Aug	Unstressed log-phase growth (control)	Positive	Indirect	Microarray analysis - wt vs TF mutant
YLR131C	ACE2	YBR009C	HHF1	20385592	2010 Aug	Unstressed log-phase growth (control)	Negative	Indirect	Microarray analysis - wt vs TF mutant
YLR131C	ACE2	YBR011C	IPP1	20385592	2010 Aug	Unstressed log-phase growth (control)	Positive	Indirect	Microarray analysis - wt vs TF mutant
YLR131C	ACE2	YBR013C	YBR013C	20385592	2010 Aug	Unstressed log-phase growth (control)	Negative	Indirect	Microarray analysis - wt vs TF mutant
YLR131C	ACE2	YBR029C	CDS1	20385592	2010 Aug	Unstressed log-phase growth (control)	Positive	Indirect	Microarray analysis - wt vs TF mutant
YLR131C	ACE2	YBR031W	RPL4A	20385592	2010 Aug	Unstressed log-phase growth (control)	Positive	Indirect	Microarray analysis - wt vs TF mutant
YLR131C	ACE2	YBR050C	REG2	16709784	2006 May 19	N/A	N/A	Direct	Chip-on-chip
YLR131C	ACE2	YBR057C	MUM2	12399584	2002 Oct 25	Unstressed log-phase growth (control)	N/A	Direct	Chip-on-chip
YLR131C	ACE2	YBR057C	MUM2	15343339	2004 Sep 2	N/A	N/A	Direct	Chip-on-chip
YLR131C	ACE2	YBR067C	TIP1	20385592	2010 Aug	Unstressed log-phase growth (control)	Positive	Indirect	Microarray analysis - wt vs TF mutant
YLR131C	ACE2	YBR076W	ECM8	20385592	2010 Aug	Unstressed log-phase growth (control)	Negative	Indirect	Microarray analysis - wt vs TF mutant
YLR131C	ACE2	YBR084C-A	RPL19A	20385592	2010 Aug	Unstressed log-phase growth (control)	Negative	Indirect	Microarray analysis - wt vs TF mutant
YLR131C	ACE2	YBR090C	YBR090C	20385592	2010 Aug	Unstressed log-phase growth (control)	Negative	Indirect	Microarray analysis - wt vs TF mutant
YLR131C	ACE2	YBR091C	TIM12	20385592	2010 Aug	Unstressed log-phase growth (control)	Negative	Indirect	Microarray analysis - wt vs TF mutant
YLR131C	ACE2	YBR092C	PHO3	20385592	2010 Aug	Unstressed log-phase growth (control)	Positive	Indirect	Microarray analysis - wt vs TF mutant
YLR131C	ACE2	YBR118W	TEF2	20385592	2010 Aug	Unstressed log-phase growth (control)	Positive	Indirect	Microarray analysis - wt vs TF mutant
YLR131C	ACE2	YBR145W	ADH5	20385592	2010 Aug	Unstressed log-phase growth (control)	Positive	Indirect	Microarray analysis - wt vs TF mutant
YLR131C	ACE2	YBR157C	ICS2	11572776	2001 Sep 21	Unstressed log-phase growth (control)	N/A	Direct	Chip-on-chip
YLR131C	ACE2	YBR157C	ICS2	15343339	2004 Sep 2	N/A	N/A	Direct	Chip-on-chip
YLR131C	ACE2	YBR157C	ICS2	16709784	2006 May 19	N/A	N/A	Direct	Chip-on-chip
YLR131C	ACE2	YBR157C	ICS2	20385592	2010 Aug	Unstressed log-phase growth (control)	Positive	Indirect	Microarray analysis - wt vs TF mutant
YLR131C	ACE2	YBR158W	AMN1	10535956	1999 Oct 26	Cell cycle/morphology	N/A	Direct	ChIP
YLR131C	ACE2	YBR158W	AMN1	11309124	2001 Apr	Unstressed log-phase growth (control)	Positive	Indirect	Northern blot (WT vs TF deletion mutant)
YLR131C	ACE2	YBR158W	AMN1	11309124	2001 Apr	Unstressed log-phase growth (control)	Positive	Indirect	Northern blot (WT vs ace1DELTAswi5DELTA double deletion mutant)
YLR131C	ACE2	YBR158W	AMN1	11572776	2001 Sep 21	Unstressed log-phase growth (control)	N/A	Direct	Chip-on-chip
YLR131C	ACE2	YBR158W	AMN1	12399584	2002 Oct 25	Unstressed log-phase growth (control)	N/A	Direct	Chip-on-chip
YLR131C	ACE2	YBR158W	AMN1	15343339	2004 Sep 2	N/A	N/A	Direct	Chip-on-chip
YLR131C	ACE2	YBR158W	AMN1	16709784	2006 May 19	N/A	N/A	Direct	Chip-on-chip
YLR131C	ACE2	YBR158W	AMN1	17898805	2007 Oct 17	N/A	N/A	Direct	ChIP
YLR131C	ACE2	YBR158W	AMN1	20385592	2010 Aug	Unstressed log-phase growth (control)	Positive	Indirect	Microarray analysis - wt vs TF mutant
YLR131C	ACE2	YBR159W	IFA38	15343339	2004 Sep 2	N/A	N/A	Direct	Chip-on-chip
YLR131C	ACE2	YBR162W-A	YSY6	20385592	2010 Aug	Unstressed log-phase growth (control)	Negative	Indirect	Microarray analysis - wt vs TF mutant
YLR131C	ACE2	YBR196C	PGI1	20385592	2010 Aug	Unstressed log-phase growth (control)	Positive	Indirect	Microarray analysis - wt vs TF mutant
YLR131C	ACE2	YBR209W	YBR209W	20385592	2010 Aug	Unstressed log-phase growth (control)	Positive	Indirect	Microarray analysis - wt vs TF mutant
YLR131C	ACE2	YBR220C	YBR220C	20385592	2010 Aug	Unstressed log-phase growth (control)	Positive	Indirect	Microarray analysis - wt vs TF mutant
YLR131C	ACE2	YBR222C	PCS60	20385592	2010 Aug	Unstressed log-phase growth (control)	Positive	Indirect	Microarray analysis - wt vs TF mutant
YLR131C	ACE2	YBR229C	ROT2	12399584	2002 Oct 25	Unstressed log-phase growth (control)	N/A	Direct	Chip-on-chip
YLR131C	ACE2	YBR230C	OM14	12399584	2002 Oct 25	Unstressed log-phase growth (control)	N/A	Direct	Chip-on-chip
YLR131C	ACE2	YBR230C	OM14	15343339	2004 Sep 2	N/A	N/A	Direct	Chip-on-chip
YLR131C	ACE2	YBR231C	SWC5	20385592	2010 Aug	Unstressed log-phase growth (control)	Negative	Indirect	Microarray analysis - wt vs TF mutant
YLR131C	ACE2	YBR243C	ALG7	20385592	2010 Aug	Unstressed log-phase growth (control)	Positive	Indirect	Microarray analysis - wt vs TF mutant
YLR131C	ACE2	YBR249C	ARO4	20385592	2010 Aug	Unstressed log-phase growth (control)	Positive	Indirect	Microarray analysis - wt vs TF mutant
YLR131C	ACE2	YBR262C	MIC12	20385592	2010 Aug	Unstressed log-phase growth (control)	Negative	Indirect	Microarray analysis - wt vs TF mutant
YLR131C	ACE2	YBR265W	TSC10	20385592	2010 Aug	Unstressed log-phase growth (control)	Positive	Indirect	Microarray analysis - wt vs TF mutant
YLR131C	ACE2	YBR283C	SSH1	20385592	2010 Aug	Unstressed log-phase growth (control)	Positive	Indirect	Microarray analysis - wt vs TF mutant
YLR131C	ACE2	YCL004W	PGS1	20385592	2010 Aug	Unstressed log-phase growth (control)	Positive	Indirect	Microarray analysis - wt vs TF mutant
YLR131C	ACE2	YCL009C	ILV6	20385592	2010 Aug	Unstressed log-phase growth (control)	Positive	Indirect	Microarray analysis - wt vs TF mutant
YLR131C	ACE2	YCL010C	SGF29	20385592	2010 Aug	Unstressed log-phase growth (control)	Negative	Indirect	Microarray analysis - wt vs TF mutant
YLR131C	ACE2	YCL017C	NFS1	20385592	2010 Aug	Unstressed log-phase growth (control)	Positive	Indirect	Microarray analysis - wt vs TF mutant
YLR131C	ACE2	YCL018W	LEU2	20385592	2010 Aug	Unstressed log-phase growth (control)	Positive	Indirect	Microarray analysis - wt vs TF mutant
YLR131C	ACE2	YCL035C	GRX1	20385592	2010 Aug	Unstressed log-phase growth (control)	Negative	Indirect	Microarray analysis - wt vs TF mutant
YLR131C	ACE2	YCL050C	APA1	20385592	2010 Aug	Unstressed log-phase growth (control)	Positive	Indirect	Microarray analysis - wt vs TF mutant
YLR131C	ACE2	YCL065W	Uncharacterized	20385592	2010 Aug	Unstressed log-phase growth (control)	Positive	Indirect	Microarray analysis - wt vs TF mutant
YLR131C	ACE2	YCL066W	HMLALPHA1	20385592	2010 Aug	Unstressed log-phase growth (control)	Positive	Indirect	Microarray analysis - wt vs TF mutant
YLR131C	ACE2	YCR013C	Uncharacterized	20385592	2010 Aug	Unstressed log-phase growth (control)	Positive	Indirect	Microarray analysis - wt vs TF mutant
YLR131C	ACE2	YCR018C-A	Uncharacterized	20385592	2010 Aug	Unstressed log-phase growth (control)	Negative	Indirect	Microarray analysis - wt vs TF mutant
YLR131C	ACE2	YCR024C	SLM5	20385592	2010 Aug	Unstressed log-phase growth (control)	Negative	Indirect	Microarray analysis - wt vs TF mutant
YLR131C	ACE2	YCR034W	ELO2	20385592	2010 Aug	Unstressed log-phase growth (control)	Positive	Indirect	Microarray analysis - wt vs TF mutant
YLR131C	ACE2	YCR040W	MATALPHA1	20385592	2010 Aug	Unstressed log-phase growth (control)	Positive	Indirect	Microarray analysis - wt vs TF mutant
YLR131C	ACE2	YCR041W	YCR041W	20385592	2010 Aug	Unstressed log-phase growth (control)	Positive	Indirect	Microarray analysis - wt vs TF mutant
YLR131C	ACE2	YCR059C	YIH1	20385592	2010 Aug	Unstressed log-phase growth (control)	Positive	Indirect	Microarray analysis - wt vs TF mutant
YLR131C	ACE2	YCR069W	CPR4	20385592	2010 Aug	Unstressed log-phase growth (control)	Positive	Indirect	Microarray analysis - wt vs TF mutant
YLR131C	ACE2	YCR088W	ABP1	20385592	2010 Aug	Unstressed log-phase growth (control)	Positive	Indirect	Microarray analysis - wt vs TF mutant
YLR131C	ACE2	YCR097W	HMRA1	20385592	2010 Aug	Unstressed log-phase growth (control)	Negative	Indirect	Microarray analysis - wt vs TF mutant
YLR131C	ACE2	YCR097W-A	Uncharacterized	20385592	2010 Aug	Unstressed log-phase growth (control)	Negative	Indirect	Microarray analysis - wt vs TF mutant
YLR131C	ACE2	YDL015C	TSC13	20385592	2010 Aug	Unstressed log-phase growth (control)	Positive	Indirect	Microarray analysis - wt vs TF mutant
YLR131C	ACE2	YDL041W	Uncharacterized	12399584	2002 Oct 25	Unstressed log-phase growth (control)	N/A	Direct	Chip-on-chip
YLR131C	ACE2	YDL055C	PSA1	11572776	2001 Sep 21	Unstressed log-phase growth (control)	N/A	Direct	Chip-on-chip
YLR131C	ACE2	YDL061C	RPS29B	20385592	2010 Aug	Unstressed log-phase growth (control)	Negative	Indirect	Microarray analysis - wt vs TF mutant
YLR131C	ACE2	YDL075W	RPL31A	20385592	2010 Aug	Unstressed log-phase growth (control)	Negative	Indirect	Microarray analysis - wt vs TF mutant
YLR131C	ACE2	YDL081C	RPP1A	20385592	2010 Aug	Unstressed log-phase growth (control)	Negative	Indirect	Microarray analysis - wt vs TF mutant
YLR131C	ACE2	YDL121C	EXP1	20385592	2010 Aug	Unstressed log-phase growth (control)	Negative	Indirect	Microarray analysis - wt vs TF mutant
YLR131C	ACE2	YDL127W	PCL2	10535956	1999 Oct 26	Cell cycle/morphology	N/A	Direct	ChIP
YLR131C	ACE2	YDL127W	PCL2	11572776	2001 Sep 21	Unstressed log-phase growth (control)	N/A	Direct	Chip-on-chip
YLR131C	ACE2	YDL127W	PCL2	15343339	2004 Sep 2	N/A	N/A	Direct	Chip-on-chip
YLR131C	ACE2	YDL131W	LYS21	20385592	2010 Aug	Unstressed log-phase growth (control)	Positive	Indirect	Microarray analysis - wt vs TF mutant
YLR131C	ACE2	YDL133C-A	RPL41B	20385592	2010 Aug	Unstressed log-phase growth (control)	Negative	Indirect	Microarray analysis - wt vs TF mutant
YLR131C	ACE2	YDL136W	RPL35B	20385592	2010 Aug	Unstressed log-phase growth (control)	Negative	Indirect	Microarray analysis - wt vs TF mutant
YLR131C	ACE2	YDL182W	LYS20	20385592	2010 Aug	Unstressed log-phase growth (control)	Positive	Indirect	Microarray analysis - wt vs TF mutant
YLR131C	ACE2	YDL184C	RPL41A	20385592	2010 Aug	Unstressed log-phase growth (control)	Negative	Indirect	Microarray analysis - wt vs TF mutant
YLR131C	ACE2	YDL191W	RPL35A	20385592	2010 Aug	Unstressed log-phase growth (control)	Negative	Indirect	Microarray analysis - wt vs TF mutant
YLR131C	ACE2	YDL198C	GGC1	20385592	2010 Aug	Unstressed log-phase growth (control)	Positive	Indirect	Microarray analysis - wt vs TF mutant
YLR131C	ACE2	YDL220C	CDC13	20385592	2010 Aug	Unstressed log-phase growth (control)	Negative	Indirect	Microarray analysis - wt vs TF mutant
YLR131C	ACE2	YDL227C	HO	8657150	1996 Apr	In vitro	N/A	Direct	DNA footprinting
YLR131C	ACE2	YDL227C	HO	10535956	1999 Oct 26	Cell cycle/morphology	N/A	Direct	ChIP
YLR131C	ACE2	YDL227C	HO	17898805	2007 Oct 17	N/A	N/A	Direct	Chip-on-chip
YLR131C	ACE2	YDL229W	SSB1	20385592	2010 Aug	Unstressed log-phase growth (control)	Positive	Indirect	Microarray analysis - wt vs TF mutant
YLR131C	ACE2	YDR010C	YDR010C	12399584	2002 Oct 25	Unstressed log-phase growth (control)	N/A	Direct	Chip-on-chip
YLR131C	ACE2	YDR010C	YDR010C	15343339	2004 Sep 2	N/A	N/A	Direct	Chip-on-chip
[truncated: 313,497+ more rows]
